# Supplementary material for: Correlations of surface tension for mixtures of n-alkanes as a function of the composition: applicability and performance analysis of existing models
Source: Royal Society of Chemistry journal article supplement (doi:10.1039/d5cp01354b), 2025-01-01
Supplement: d5cp01354b1.xlsx [file d5cp01354b1.xlsx]

## Sheet: CASE 1A
MIXTURE	REFERENCES	T / K	N-data	model	Nº of coefficients	Coefficients Value	AAD (%)	PDm (%)
decane(1)+docosane(2)	WW2005QUE1 = Queimada et al. (2005)	323.15	5	EBE	1	{0.67}	0.54	1.71
decane(1)+docosane(2)	WW2005QUE1 = Queimada et al. (2005)	323.15	5	WSD	1	{1.055}	0.44	1.44
decane(1)+docosane(2)	WW2005QUE1 = Queimada et al. (2005)	323.15	5	JOAC1	1	{0.12}	0.37	1.23
decane(1)+docosane(2)	WW2005QUE1 = Queimada et al. (2005)	323.15	5	BCRG	1	{0.445}	0.57	1.8
decane(1)+docosane(2)	WW2005QUE1 = Queimada et al. (2005)	323.15	5	CW	2	{-1.582, 0.629}	0.26	0.99
decane(1)+docosane(2)	WW2005QUE1 = Queimada et al. (2005)	323.15	5	RK2	2	{2.166, 1.161}	0.23	0.85
decane(1)+docosane(2)	WW2005QUE1 = Queimada et al. (2005)	323.15	5	JOAC2	2	{0.118, -0.032}	0.24	0.89
decane(1)+docosane(2)	WW2005QUE1 = Queimada et al. (2005)	323.15	5	FLW	2	{0.554, 1.443}	0.17	0.55
decane(1)+docosane(2)	WW2005QUE1 = Queimada et al. (2005)	323.15	5	QYDH	2	{0.823, 1.235}	0.25	0.94
decane(1)+docosane(2)	WW2005QUE1 = Queimada et al. (2005)	323.15	5	SIGMO	2	{0.847, 1.338}	0.26	1
decane(1)+docosane(2)	WW2005QUE1 = Queimada et al. (2005)	323.15	5	RK3	3	{2.368, 2.167, -2.238}	0.1	0.41
decane(1)+docosane(2)	WW2005QUE1 = Queimada et al. (2005)	323.15	5	JOAC3	3	{0.126, -0.078, -0.1}	0.11	0.43
decane(1)+docosane(2)	WW2005QUE1 = Queimada et al. (2005)	323.15	5	SFF	3	{-0.472, 0.971, 3.678}	0.08	0.33
decane(1)+docosane(2)	WW2005QUE1 = Queimada et al. (2005)	333.15	5	EBE	1	{0.662}	0.41	1.19
decane(1)+docosane(2)	WW2005QUE1 = Queimada et al. (2005)	333.15	5	WSD	1	{1.061}	0.28	1.03
decane(1)+docosane(2)	WW2005QUE1 = Queimada et al. (2005)	333.15	5	JOAC1	1	{0.137}	0.25	0.89
decane(1)+docosane(2)	WW2005QUE1 = Queimada et al. (2005)	333.15	5	BCRG	1	{0.433}	0.45	1.23
decane(1)+docosane(2)	WW2005QUE1 = Queimada et al. (2005)	333.15	5	CW	2	{-4.11, 1.244}	0.16	0.44
decane(1)+docosane(2)	WW2005QUE1 = Queimada et al. (2005)	333.15	5	RK2	2	{2.465, 0.259}	0.24	0.93
decane(1)+docosane(2)	WW2005QUE1 = Queimada et al. (2005)	333.15	5	JOAC2	2	{0.137, 0.005}	0.25	0.93
decane(1)+docosane(2)	WW2005QUE1 = Queimada et al. (2005)	333.15	5	FLW	2	{0.7, 1.194}	0.36	1.08
decane(1)+docosane(2)	WW2005QUE1 = Queimada et al. (2005)	333.15	5	QYDH	2	{0.723, 1.127}	0.22	0.88
decane(1)+docosane(2)	WW2005QUE1 = Queimada et al. (2005)	333.15	5	SIGMO	2	{0.396, 1.529}	0.21	0.46
decane(1)+docosane(2)	WW2005QUE1 = Queimada et al. (2005)	333.15	5	RK3	3	{2.392, 1.479, 2.383}	0.07	0.26
decane(1)+docosane(2)	WW2005QUE1 = Queimada et al. (2005)	333.15	5	JOAC3	3	{0.133, -0.041, 0.097}	0.07	0.23
decane(1)+docosane(2)	WW2005QUE1 = Queimada et al. (2005)	333.15	5	SFF	3	{-0.44, 0.084, 1.334}	0.24	0.94
decane(1)+docosane(2)	WW2005QUE1 = Queimada et al. (2005)	343.15	5	EBE	1	{0.606}	0.39	0.94
decane(1)+docosane(2)	WW2005QUE1 = Queimada et al. (2005)	343.15	5	WSD	1	{1.079}	0.46	0.64
decane(1)+docosane(2)	WW2005QUE1 = Queimada et al. (2005)	343.15	5	JOAC1	1	{0.178}	0.51	0.86
decane(1)+docosane(2)	WW2005QUE1 = Queimada et al. (2005)	343.15	5	BCRG	1	{0.366}	0.35	1.02
decane(1)+docosane(2)	WW2005QUE1 = Queimada et al. (2005)	343.15	5	CW	2	{0.657, 0.302}	0.28	1.25
decane(1)+docosane(2)	WW2005QUE1 = Queimada et al. (2005)	343.15	5	RK2	2	{2.833, -1.625}	0.33	1.42
decane(1)+docosane(2)	WW2005QUE1 = Queimada et al. (2005)	343.15	5	JOAC2	2	{0.16, 0.089}	0.36	1.48
decane(1)+docosane(2)	WW2005QUE1 = Queimada et al. (2005)	343.15	5	FLW	2	{1.701, 0.588}	0.54	1.13
decane(1)+docosane(2)	WW2005QUE1 = Queimada et al. (2005)	343.15	5	QYDH	2	{0.557, 0.835}	0.33	1.48
decane(1)+docosane(2)	WW2005QUE1 = Queimada et al. (2005)	343.15	5	SIGMO	2	{4.703, 1.452}	0.48	0.96
decane(1)+docosane(2)	WW2005QUE1 = Queimada et al. (2005)	343.15	5	RK3	3	{2.685, 0.167, 3.653}	0.15	0.38
decane(1)+docosane(2)	WW2005QUE1 = Queimada et al. (2005)	343.15	5	JOAC3	3	{0.153, 0.019, 0.161}	0.14	0.35
decane(1)+docosane(2)	WW2005QUE1 = Queimada et al. (2005)	343.15	5	SFF	3	{-0.383, -0.524, 3.252}	0.26	1.11
decane(1)+dodecane(2)	WW76R1 = Ramakrishnan et al. (1976)	303.15	5	EBE	1	{1.036}	0.05	0.15
decane(1)+dodecane(2)	WW76R1 = Ramakrishnan et al. (1976)	303.15	5	WSD	1	{0.999}	0.05	0.13
decane(1)+dodecane(2)	WW76R1 = Ramakrishnan et al. (1976)	303.15	5	JOAC1	1	{0.0}	0.05	0.15
decane(1)+dodecane(2)	WW76R1 = Ramakrishnan et al. (1976)	303.15	5	BCRG	1	{1.073}	0.05	0.15
decane(1)+dodecane(2)	WW76R1 = Ramakrishnan et al. (1976)	303.15	5	CW	2	{-29.052, -0.531}	0.05	0.16
decane(1)+dodecane(2)	WW76R1 = Ramakrishnan et al. (1976)	303.15	5	RK2	2	{-0.053, -0.073}	0.05	0.17
decane(1)+dodecane(2)	WW76R1 = Ramakrishnan et al. (1976)	303.15	5	JOAC2	2	{0., 0.003}	0.05	0.17
decane(1)+dodecane(2)	WW76R1 = Ramakrishnan et al. (1976)	303.15	5	FLW	2	{1.841, 0.561}	0.16	0.51
decane(1)+dodecane(2)	WW76R1 = Ramakrishnan et al. (1976)	303.15	5	QYDH	2	{0.992, 0.941}	0.05	0.18
decane(1)+dodecane(2)	WW76R1 = Ramakrishnan et al. (1976)	303.15	5	SIGMO	2	{5.494, 0.975}	0.05	0.16
decane(1)+dodecane(2)	WW76R1 = Ramakrishnan et al. (1976)	303.15	5	RK3	3	{-0.055, -0.014, 0.099}	0.05	0.16
decane(1)+dodecane(2)	WW76R1 = Ramakrishnan et al. (1976)	303.15	5	JOAC3	3	{0., 0.001, 0.004}	0.05	0.17
decane(1)+dodecane(2)	WW76R1 = Ramakrishnan et al. (1976)	303.15	5	SFF	3	{0.079, -0.092, 1.03}	0.05	0.17
decane(1)+eicosane(2)	WW2005QUE1 = Queimada et al. (2005)	313.15	5	EBE	1	{0.654}	0.39	1.08
decane(1)+eicosane(2)	WW2005QUE1 = Queimada et al. (2005)	313.15	5	WSD	1	{1.049}	0.28	0.96
decane(1)+eicosane(2)	WW2005QUE1 = Queimada et al. (2005)	313.15	5	JOAC1	1	{0.108}	0.25	0.86
decane(1)+eicosane(2)	WW2005QUE1 = Queimada et al. (2005)	313.15	5	BCRG	1	{0.422}	0.43	1.12
decane(1)+eicosane(2)	WW2005QUE1 = Queimada et al. (2005)	313.15	5	CW	2	{-6.227, 1.616}	0.16	0.39
decane(1)+eicosane(2)	WW2005QUE1 = Queimada et al. (2005)	313.15	5	RK2	2	{2.202, 0.336}	0.25	0.81
decane(1)+eicosane(2)	WW2005QUE1 = Queimada et al. (2005)	313.15	5	JOAC2	2	{0.11, -0.002}	0.26	0.81
decane(1)+eicosane(2)	WW2005QUE1 = Queimada et al. (2005)	313.15	5	FLW	2	{0.63, 1.336}	0.31	0.9
decane(1)+eicosane(2)	WW2005QUE1 = Queimada et al. (2005)	313.15	5	QYDH	2	{0.736, 1.171}	0.23	0.73
decane(1)+eicosane(2)	WW2005QUE1 = Queimada et al. (2005)	313.15	5	SIGMO	2	{0.278, 1.62}	0.22	0.39
decane(1)+eicosane(2)	WW2005QUE1 = Queimada et al. (2005)	313.15	5	RK3	3	{1.988, 1.481, 2.503}	0.08	0.21
decane(1)+eicosane(2)	WW2005QUE1 = Queimada et al. (2005)	313.15	5	JOAC3	3	{0.1, -0.045, 0.097}	0.08	0.24
decane(1)+eicosane(2)	WW2005QUE1 = Queimada et al. (2005)	313.15	5	SFF	3	{-0.499, 0.136, 0.616}	0.25	0.84
decane(1)+eicosane(2)	WW2005QUE1 = Queimada et al. (2005)	323.15	5	EBE	1	{0.605}	0.54	1.11
decane(1)+eicosane(2)	WW2005QUE1 = Queimada et al. (2005)	323.15	5	WSD	1	{1.06}	0.39	0.8
decane(1)+eicosane(2)	WW2005QUE1 = Queimada et al. (2005)	323.15	5	JOAC1	1	{0.13}	0.31	0.66
decane(1)+eicosane(2)	WW2005QUE1 = Queimada et al. (2005)	323.15	5	BCRG	1	{0.358}	0.6	1.25
decane(1)+eicosane(2)	WW2005QUE1 = Queimada et al. (2005)	323.15	5	CW	2	{-2.051, 0.912}	0.13	0.25
decane(1)+eicosane(2)	WW2005QUE1 = Queimada et al. (2005)	323.15	5	RK2	2	{2.479, 1.687}	0.04	0.11
decane(1)+eicosane(2)	WW2005QUE1 = Queimada et al. (2005)	323.15	5	JOAC2	2	{0.125, -0.056}	0.05	0.12
decane(1)+eicosane(2)	WW2005QUE1 = Queimada et al. (2005)	323.15	5	FLW	2	{0.556, 1.438}	0.07	0.15
decane(1)+eicosane(2)	WW2005QUE1 = Queimada et al. (2005)	323.15	5	QYDH	2	{0.849, 1.459}	0.05	0.11
decane(1)+eicosane(2)	WW2005QUE1 = Queimada et al. (2005)	323.15	5	SIGMO	2	{0.237, 1.701}	0.08	0.17
decane(1)+eicosane(2)	WW2005QUE1 = Queimada et al. (2005)	323.15	5	RK3	3	{2.504, 1.613, -0.24}	0.02	0.08
decane(1)+eicosane(2)	WW2005QUE1 = Queimada et al. (2005)	323.15	5	JOAC3	3	{0.126, -0.054, -0.014}	0.03	0.1
decane(1)+eicosane(2)	WW2005QUE1 = Queimada et al. (2005)	323.15	5	SFF	3	{-0.723, 0.592, 1.265}	0.02	0.09
decane(1)+eicosane(2)	WW2005QUE1 = Queimada et al. (2005)	333.15	5	EBE	1	{0.711}	0.56	1.4
decane(1)+eicosane(2)	WW2005QUE1 = Queimada et al. (2005)	333.15	5	WSD	1	{1.047}	0.5	1.25
decane(1)+eicosane(2)	WW2005QUE1 = Queimada et al. (2005)	333.15	5	JOAC1	1	{0.108}	0.45	1.13
decane(1)+eicosane(2)	WW2005QUE1 = Queimada et al. (2005)	333.15	5	BCRG	1	{0.506}	0.57	1.44
decane(1)+eicosane(2)	WW2005QUE1 = Queimada et al. (2005)	333.15	5	CW	2	{-5.799, 1.568}	0.12	0.52
decane(1)+eicosane(2)	WW2005QUE1 = Queimada et al. (2005)	333.15	5	RK2	2	{2.208, 1.75}	0.23	0.6
decane(1)+eicosane(2)	WW2005QUE1 = Queimada et al. (2005)	333.15	5	JOAC2	2	{0.12, -0.061}	0.22	0.59
decane(1)+eicosane(2)	WW2005QUE1 = Queimada et al. (2005)	333.15	5	FLW	2	{0.531, 1.492}	0.33	0.77
decane(1)+eicosane(2)	WW2005QUE1 = Queimada et al. (2005)	333.15	5	QYDH	2	{0.887, 1.434}	0.21	0.59
decane(1)+eicosane(2)	WW2005QUE1 = Queimada et al. (2005)	333.15	5	SIGMO	2	{0.221, 1.665}	0.18	0.57
decane(1)+eicosane(2)	WW2005QUE1 = Queimada et al. (2005)	333.15	5	RK3	3	{2.093, 2.022, 1.513}	0.12	0.47
decane(1)+eicosane(2)	WW2005QUE1 = Queimada et al. (2005)	333.15	5	JOAC3	3	{0.116, -0.072, 0.056}	0.12	0.48
decane(1)+eicosane(2)	WW2005QUE1 = Queimada et al. (2005)	333.15	5	SFF	3	{-0.794, 0.658, 0.814}	0.23	0.62
decane(1)+eicosane(2)	WW2005QUE1 = Queimada et al. (2005)	343.15	5	EBE	1	{0.701}	0.69	1.31
decane(1)+eicosane(2)	WW2005QUE1 = Queimada et al. (2005)	343.15	5	WSD	1	{1.05}	0.61	1.19
decane(1)+eicosane(2)	WW2005QUE1 = Queimada et al. (2005)	343.15	5	JOAC1	1	{0.112}	0.54	1.14
decane(1)+eicosane(2)	WW2005QUE1 = Queimada et al. (2005)	343.15	5	BCRG	1	{0.488}	0.72	1.34
decane(1)+eicosane(2)	WW2005QUE1 = Queimada et al. (2005)	343.15	5	CW	2	{-9.246, 1.981}	0.19	0.8
decane(1)+eicosane(2)	WW2005QUE1 = Queimada et al. (2005)	343.15	5	RK2	2	{2.116, 2.661}	0.27	0.7
decane(1)+eicosane(2)	WW2005QUE1 = Queimada et al. (2005)	343.15	5	JOAC2	2	{0.121, -0.099}	0.25	0.6
decane(1)+eicosane(2)	WW2005QUE1 = Queimada et al. (2005)	343.15	5	FLW	2	{0.423, 1.754}	0.28	0.61
decane(1)+eicosane(2)	WW2005QUE1 = Queimada et al. (2005)	343.15	5	QYDH	2	{1.013, 1.592}	0.25	0.59
decane(1)+eicosane(2)	WW2005QUE1 = Queimada et al. (2005)	343.15	5	SIGMO	2	{0.08, 1.815}	0.23	0.52
decane(1)+eicosane(2)	WW2005QUE1 = Queimada et al. (2005)	343.15	5	RK3	3	{1.886, 1.898, 1.917}	0.14	0.71
decane(1)+eicosane(2)	WW2005QUE1 = Queimada et al. (2005)	343.15	5	JOAC3	3	{0.112, -0.068, 0.077}	0.15	0.73
decane(1)+eicosane(2)	WW2005QUE1 = Queimada et al. (2005)	343.15	5	SFF	3	{-1.426, 1.383, 0.396}	0.23	0.58
decane(1)+hexadecane(2)	WW2002ROL1 = Rolo et al. (2002)	293.15	3	EBE	1	{1.11}	0.08	0.15
decane(1)+hexadecane(2)	WW2002ROL1 = Rolo et al. (2002)	293.15	3	WSD	1	{0.995}	0.07	0.15
decane(1)+hexadecane(2)	WW2002ROL1 = Rolo et al. (2002)	293.15	3	JOAC1	1	{-0.005}	0.08	0.15
decane(1)+hexadecane(2)	WW2002ROL1 = Rolo et al. (2002)	293.15	3	BCRG	1	{1.232}	0.08	0.15
decane(1)+hexadecane(2)	WW2002ROL1 = Rolo et al. (2002)	293.15	3	CW	2	{0.63, -0.072}	0.03	0.09
decane(1)+hexadecane(2)	WW2002ROL1 = Rolo et al. (2002)	293.15	3	RK2	2	{-0.341, 0.306}	0.01	0.04
decane(1)+hexadecane(2)	WW2002ROL1 = Rolo et al. (2002)	293.15	3	JOAC2	2	{-0.004, -0.012}	0.01	0.02
decane(1)+hexadecane(2)	WW2002ROL1 = Rolo et al. (2002)	293.15	3	FLW	2	{1.425, 0.731}	0.17	0.52
decane(1)+hexadecane(2)	WW2002ROL1 = Rolo et al. (2002)	293.15	3	QYDH	2	{1.178, 1.081}	0	0.01
decane(1)+hexadecane(2)	WW2002ROL1 = Rolo et al. (2002)	293.15	3	SIGMO	2	{0.439, 1.126}	0.01	0.02
decane(1)+hexadecane(2)	WW2002ROL1 = Rolo et al. (2002)	293.15	3	RK3	3	{-0.38, 0.305, 0.156}	0	0
decane(1)+hexadecane(2)	WW2002ROL1 = Rolo et al. (2002)	293.15	3	JOAC3	3	{-0.005, -0.012, 0.005}	0	0
decane(1)+hexadecane(2)	WW2002ROL1 = Rolo et al. (2002)	293.15	3	SFF	3	{-0.002, 0.169, 0.738}	0.01	0.02
decane(1)+hexadecane(2)	WW2002ROL1 = Rolo et al. (2002)	303.15	3	EBE	1	{0.876}	0.27	0.62
decane(1)+hexadecane(2)	WW2002ROL1 = Rolo et al. (2002)	303.15	3	WSD	1	{1.013}	0.27	0.59
decane(1)+hexadecane(2)	WW2002ROL1 = Rolo et al. (2002)	303.15	3	JOAC1	1	{0.032}	0.28	0.58
decane(1)+hexadecane(2)	WW2002ROL1 = Rolo et al. (2002)	303.15	3	BCRG	1	{0.769}	0.27	0.62
decane(1)+hexadecane(2)	WW2002ROL1 = Rolo et al. (2002)	303.15	3	CW	2	{0.584, 0.077}	0.27	0.7
decane(1)+hexadecane(2)	WW2002ROL1 = Rolo et al. (2002)	303.15	3	RK2	2	{0.355, -0.304}	0.25	0.75
decane(1)+hexadecane(2)	WW2002ROL1 = Rolo et al. (2002)	303.15	3	JOAC2	2	{0.025, 0.014}	0.25	0.75
decane(1)+hexadecane(2)	WW2002ROL1 = Rolo et al. (2002)	303.15	3	FLW	2	{1.045, 0.928}	0.11	0.19
decane(1)+hexadecane(2)	WW2002ROL1 = Rolo et al. (2002)	303.15	3	QYDH	2	{0.858, 0.93}	0.24	0.72
decane(1)+hexadecane(2)	WW2002ROL1 = Rolo et al. (2002)	303.15	3	SIGMO	2	{6.145, 1.121}	0.31	0.51
decane(1)+hexadecane(2)	WW2002ROL1 = Rolo et al. (2002)	303.15	3	RK3	3	{1.12, -0.292, -3.037}	0	0
decane(1)+hexadecane(2)	WW2002ROL1 = Rolo et al. (2002)	303.15	3	JOAC3	3	{0.055, 0.013, -0.12}	0	0.01
decane(1)+hexadecane(2)	WW2002ROL1 = Rolo et al. (2002)	303.15	3	SFF	3	{0.151, -0.314, 0.305}	0.24	0.72
decane(1)+hexadecane(2)	WW2002ROL1 = Rolo et al. (2002)	313.15	3	EBE	1	{0.806}	0.3	0.81
decane(1)+hexadecane(2)	WW2002ROL1 = Rolo et al. (2002)	313.15	3	WSD	1	{1.019}	0.3	0.85
decane(1)+hexadecane(2)	WW2002ROL1 = Rolo et al. (2002)	313.15	3	JOAC1	1	{0.044}	0.28	0.85
decane(1)+hexadecane(2)	WW2002ROL1 = Rolo et al. (2002)	313.15	3	BCRG	1	{0.643}	0.31	0.79
decane(1)+hexadecane(2)	WW2002ROL1 = Rolo et al. (2002)	313.15	3	CW	2	{-0.122, 0.21}	0.28	0.87
decane(1)+hexadecane(2)	WW2002ROL1 = Rolo et al. (2002)	313.15	3	RK2	2	{0.755, 0.043}	0.28	0.87
decane(1)+hexadecane(2)	WW2002ROL1 = Rolo et al. (2002)	313.15	3	JOAC2	2	{0.043, 0.001}	0.28	0.88
decane(1)+hexadecane(2)	WW2002ROL1 = Rolo et al. (2002)	313.15	3	FLW	2	{0.916, 1.027}	0.12	0.35
decane(1)+hexadecane(2)	WW2002ROL1 = Rolo et al. (2002)	313.15	3	QYDH	2	{0.839, 1.029}	0.3	0.89
decane(1)+hexadecane(2)	WW2002ROL1 = Rolo et al. (2002)	313.15	3	SIGMO	2	{5.451, 1.171}	0.33	0.78
decane(1)+hexadecane(2)	WW2002ROL1 = Rolo et al. (2002)	313.15	3	RK3	3	{1.62, 0.057, -3.434}	0	0
decane(1)+hexadecane(2)	WW2002ROL1 = Rolo et al. (2002)	313.15	3	JOAC3	3	{0.078, 0.001, -0.139}	0	0.01
decane(1)+hexadecane(2)	WW2002ROL1 = Rolo et al. (2002)	313.15	3	SFF	3	{-0.226, 0.114, 4.237}	0.28	0.79
decane(1)+hexadecane(2)	WW2002ROL1 = Rolo et al. (2002)	323.15	3	EBE	1	{0.736}	0.28	0.53
decane(1)+hexadecane(2)	WW2002ROL1 = Rolo et al. (2002)	323.15	3	WSD	1	{1.028}	0.25	0.46
decane(1)+hexadecane(2)	WW2002ROL1 = Rolo et al. (2002)	323.15	3	JOAC1	1	{0.061}	0.21	0.4
decane(1)+hexadecane(2)	WW2002ROL1 = Rolo et al. (2002)	323.15	3	BCRG	1	{0.539}	0.3	0.56
decane(1)+hexadecane(2)	WW2002ROL1 = Rolo et al. (2002)	323.15	3	CW	2	{-2.032, 0.602}	0.09	0.24
decane(1)+hexadecane(2)	WW2002ROL1 = Rolo et al. (2002)	323.15	3	RK2	2	{1.049, 0.898}	0.03	0.1
decane(1)+hexadecane(2)	WW2002ROL1 = Rolo et al. (2002)	323.15	3	JOAC2	2	{0.057, -0.034}	0.04	0.11
decane(1)+hexadecane(2)	WW2002ROL1 = Rolo et al. (2002)	323.15	3	FLW	2	{0.572, 1.509}	0.12	0.35
decane(1)+hexadecane(2)	WW2002ROL1 = Rolo et al. (2002)	323.15	3	QYDH	2	{0.926, 1.27}	0.06	0.16
decane(1)+hexadecane(2)	WW2002ROL1 = Rolo et al. (2002)	323.15	3	SIGMO	2	{0.387, 1.408}	0.07	0.21
decane(1)+hexadecane(2)	WW2002ROL1 = Rolo et al. (2002)	323.15	3	RK3	3	{1.14, 0.899, -0.362}	0	0
decane(1)+hexadecane(2)	WW2002ROL1 = Rolo et al. (2002)	323.15	3	JOAC3	3	{0.061, -0.034, -0.019}	0.01	0.01
decane(1)+hexadecane(2)	WW2002ROL1 = Rolo et al. (2002)	323.15	3	SFF	3	{-0.439, 0.467, 1.794}	0	0
decane(1)+hexadecane(2)	WW2002ROL1 = Rolo et al. (2002)	333.15	3	EBE	1	{0.674}	0.3	0.86
decane(1)+hexadecane(2)	WW2002ROL1 = Rolo et al. (2002)	333.15	3	WSD	1	{1.035}	0.25	0.67
decane(1)+hexadecane(2)	WW2002ROL1 = Rolo et al. (2002)	333.15	3	JOAC1	1	{0.074}	0.23	0.56
decane(1)+hexadecane(2)	WW2002ROL1 = Rolo et al. (2002)	333.15	3	BCRG	1	{0.45}	0.33	0.92
decane(1)+hexadecane(2)	WW2002ROL1 = Rolo et al. (2002)	333.15	3	CW	2	{-2.093, 0.562}	0.21	0.48
decane(1)+hexadecane(2)	WW2002ROL1 = Rolo et al. (2002)	333.15	3	RK2	2	{1.022, 0.764}	0.17	0.5
decane(1)+hexadecane(2)	WW2002ROL1 = Rolo et al. (2002)	333.15	3	JOAC2	2	{0.059, -0.029}	0.17	0.51
decane(1)+hexadecane(2)	WW2002ROL1 = Rolo et al. (2002)	333.15	3	FLW	2	{0.602, 1.437}	0.01	0.02
decane(1)+hexadecane(2)	WW2002ROL1 = Rolo et al. (2002)	333.15	3	QYDH	2	{0.908, 1.228}	0.19	0.58
decane(1)+hexadecane(2)	WW2002ROL1 = Rolo et al. (2002)	333.15	3	SIGMO	2	{0.507, 1.347}	0.2	0.6
decane(1)+hexadecane(2)	WW2002ROL1 = Rolo et al. (2002)	333.15	3	RK3	3	{1.48, 0.771, -1.818}	0	0
decane(1)+hexadecane(2)	WW2002ROL1 = Rolo et al. (2002)	333.15	3	JOAC3	3	{0.08, -0.029, -0.082}	0.01	0.01
decane(1)+hexadecane(2)	WW2002ROL1 = Rolo et al. (2002)	333.15	3	SFF	3	{-0.449, 0.776, 3.583}	0.08	0.22
decane(1)+tetracosane(2)	WW2005QUE1 = Queimada et al. (2005)	333.15	5	EBE	1	{0.651}	0.27	0.58
decane(1)+tetracosane(2)	WW2005QUE1 = Queimada et al. (2005)	333.15	5	WSD	1	{1.07}	0.2	0.36
decane(1)+tetracosane(2)	WW2005QUE1 = Queimada et al. (2005)	333.15	5	JOAC1	1	{0.157}	0.16	0.48
decane(1)+tetracosane(2)	WW2005QUE1 = Queimada et al. (2005)	333.15	5	BCRG	1	{0.424}	0.28	0.64
decane(1)+tetracosane(2)	WW2005QUE1 = Queimada et al. (2005)	333.15	5	CW	2	{-0.663, 0.589}	0.14	0.53
decane(1)+tetracosane(2)	WW2005QUE1 = Queimada et al. (2005)	333.15	5	RK2	2	{2.877, 0.649}	0.14	0.51
decane(1)+tetracosane(2)	WW2005QUE1 = Queimada et al. (2005)	333.15	5	JOAC2	2	{0.157, -0.007}	0.14	0.51
decane(1)+tetracosane(2)	WW2005QUE1 = Queimada et al. (2005)	333.15	5	FLW	2	{1.205, 0.78}	0.21	0.8
decane(1)+tetracosane(2)	WW2005QUE1 = Queimada et al. (2005)	333.15	5	QYDH	2	{0.735, 1.205}	0.14	0.52
decane(1)+tetracosane(2)	WW2005QUE1 = Queimada et al. (2005)	333.15	5	SIGMO	2	{5.3, 1.356}	0.16	0.52
decane(1)+tetracosane(2)	WW2005QUE1 = Queimada et al. (2005)	333.15	5	RK3	3	{2.878, 0.746, 0.158}	0.13	0.54
decane(1)+tetracosane(2)	WW2005QUE1 = Queimada et al. (2005)	333.15	5	JOAC3	3	{0.157, -0.011, 0.007}	0.14	0.54
decane(1)+tetracosane(2)	WW2005QUE1 = Queimada et al. (2005)	333.15	5	SFF	3	{-0.564, 0.219, 0.852}	0.14	0.52
decane(1)+tetracosane(2)	WW2005QUE1 = Queimada et al. (2005)	343.15	5	EBE	1	{0.673}	0.19	0.37
decane(1)+tetracosane(2)	WW2005QUE1 = Queimada et al. (2005)	343.15	5	WSD	1	{1.072}	0.2	0.7
decane(1)+tetracosane(2)	WW2005QUE1 = Queimada et al. (2005)	343.15	5	JOAC1	1	{0.154}	0.26	0.61
decane(1)+tetracosane(2)	WW2005QUE1 = Queimada et al. (2005)	343.15	5	BCRG	1	{0.448}	0.21	0.42
decane(1)+tetracosane(2)	WW2005QUE1 = Queimada et al. (2005)	343.15	5	CW	2	{0.243, 0.344}	0.18	0.4
decane(1)+tetracosane(2)	WW2005QUE1 = Queimada et al. (2005)	343.15	5	RK2	2	{2.568, -0.387}	0.18	0.39
decane(1)+tetracosane(2)	WW2005QUE1 = Queimada et al. (2005)	343.15	5	JOAC2	2	{0.152, 0.04}	0.18	0.41
decane(1)+tetracosane(2)	WW2005QUE1 = Queimada et al. (2005)	343.15	5	FLW	2	{1.555, 0.643}	0.3	0.51
decane(1)+tetracosane(2)	WW2005QUE1 = Queimada et al. (2005)	343.15	5	QYDH	2	{0.686, 1.029}	0.17	0.41
decane(1)+tetracosane(2)	WW2005QUE1 = Queimada et al. (2005)	343.15	5	SIGMO	2	{5.901, 1.316}	0.33	0.65
decane(1)+tetracosane(2)	WW2005QUE1 = Queimada et al. (2005)	343.15	5	RK3	3	{2.572, 0.076, 0.76}	0.15	0.52
decane(1)+tetracosane(2)	WW2005QUE1 = Queimada et al. (2005)	343.15	5	JOAC3	3	{0.152, 0.018, 0.037}	0.14	0.51
decane(1)+tetracosane(2)	WW2005QUE1 = Queimada et al. (2005)	343.15	5	SFF	3	{-0.354, -0.1, 1.401}	0.17	0.4
heptane(1)+decane(2)	WW2002ROL1 = Rolo et al. (2002)	293.15	3	EBE	1	{0.813}	0.27	0.71
heptane(1)+decane(2)	WW2002ROL1 = Rolo et al. (2002)	293.15	3	WSD	1	{1.023}	0.28	0.78
heptane(1)+decane(2)	WW2002ROL1 = Rolo et al. (2002)	293.15	3	JOAC1	1	{0.055}	0.28	0.85
heptane(1)+decane(2)	WW2002ROL1 = Rolo et al. (2002)	293.15	3	BCRG	1	{0.665}	0.27	0.69
heptane(1)+decane(2)	WW2002ROL1 = Rolo et al. (2002)	293.15	3	CW	2	{0.577, 0.124}	0.26	0.55
heptane(1)+decane(2)	WW2002ROL1 = Rolo et al. (2002)	293.15	3	RK2	2	{0.37, -0.977}	0.2	0.59
heptane(1)+decane(2)	WW2002ROL1 = Rolo et al. (2002)	293.15	3	JOAC2	2	{0.033, 0.046}	0.19	0.57
heptane(1)+decane(2)	WW2002ROL1 = Rolo et al. (2002)	293.15	3	FLW	2	{1.099, 0.89}	0.26	0.41
heptane(1)+decane(2)	WW2002ROL1 = Rolo et al. (2002)	293.15	3	QYDH	2	{0.764, 0.785}	0.16	0.48
heptane(1)+decane(2)	WW2002ROL1 = Rolo et al. (2002)	293.15	3	SIGMO	2	{6.152, 1.176}	0.36	1
heptane(1)+decane(2)	WW2002ROL1 = Rolo et al. (2002)	293.15	3	RK3	3	{0.906, -0.965, -2.136}	0	0
heptane(1)+decane(2)	WW2002ROL1 = Rolo et al. (2002)	293.15	3	JOAC3	3	{0.055, 0.045, -0.09}	0.01	0.01
heptane(1)+decane(2)	WW2002ROL1 = Rolo et al. (2002)	293.15	3	SFF	3	{0.346, -0.656, 0.526}	0.17	0.52
heptane(1)+decane(2)	WW2002ROL1 = Rolo et al. (2002)	303.15	3	EBE	1	{0.859}	0.28	0.71
heptane(1)+decane(2)	WW2002ROL1 = Rolo et al. (2002)	303.15	3	WSD	1	{1.018}	0.31	0.72
heptane(1)+decane(2)	WW2002ROL1 = Rolo et al. (2002)	303.15	3	JOAC1	1	{0.043}	0.33	0.77
heptane(1)+decane(2)	WW2002ROL1 = Rolo et al. (2002)	303.15	3	BCRG	1	{0.738}	0.28	0.7
heptane(1)+decane(2)	WW2002ROL1 = Rolo et al. (2002)	303.15	3	CW	2	{0.99999999999999999999' 25, 0.09}	0.07	0.13
heptane(1)+decane(2)	WW2002ROL1 = Rolo et al. (2002)	303.15	3	RK2	2	{0.878, -1.026}	0.11	0.34
heptane(1)+decane(2)	WW2002ROL1 = Rolo et al. (2002)	303.15	3	JOAC2	2	{0.058, 0.052}	0.12	0.36
heptane(1)+decane(2)	WW2002ROL1 = Rolo et al. (2002)	303.15	3	FLW	2	{1.165, 0.848}	0.42	0.92
heptane(1)+decane(2)	WW2002ROL1 = Rolo et al. (2002)	303.15	3	QYDH	2	{0.673, 0.785}	0.14	0.42
heptane(1)+decane(2)	WW2002ROL1 = Rolo et al. (2002)	303.15	3	SIGMO	2	{8.147, 1.114}	0.38	0.81
heptane(1)+decane(2)	WW2002ROL1 = Rolo et al. (2002)	303.15	3	RK3	3	{0.587, -1.033, 1.161}	0	0
heptane(1)+decane(2)	WW2002ROL1 = Rolo et al. (2002)	303.15	3	JOAC3	3	{0.044, 0.053, 0.058}	0.01	0.01
heptane(1)+decane(2)	WW2002ROL1 = Rolo et al. (2002)	303.15	3	SFF	3	{0.028, -0.525, 1.051}	0.11	0.33
heptane(1)+decane(2)	WW70P1 = Pugachevich and Belyarov (1970)	303.15	5	EBE	1	{0.821}	0.07	0.15
heptane(1)+decane(2)	WW70P1 = Pugachevich and Belyarov (1970)	303.15	5	WSD	1	{1.019}	0.06	0.12
heptane(1)+decane(2)	WW70P1 = Pugachevich and Belyarov (1970)	303.15	5	JOAC1	1	{0.042}	0.06	0.2
heptane(1)+decane(2)	WW70P1 = Pugachevich and Belyarov (1970)	303.15	5	BCRG	1	{0.67}	0.07	0.17
heptane(1)+decane(2)	WW70P1 = Pugachevich and Belyarov (1970)	303.15	5	CW	2	{-0.324, 0.193}	0.06	0.23
heptane(1)+decane(2)	WW70P1 = Pugachevich and Belyarov (1970)	303.15	5	RK2	2	{0.586, 0.082}	0.06	0.22
heptane(1)+decane(2)	WW70P1 = Pugachevich and Belyarov (1970)	303.15	5	JOAC2	2	{0.041, -0.001}	0.06	0.23
heptane(1)+decane(2)	WW70P1 = Pugachevich and Belyarov (1970)	303.15	5	FLW	2	{1.268, 0.78}	0.15	0.51
heptane(1)+decane(2)	WW70P1 = Pugachevich and Belyarov (1970)	303.15	5	QYDH	2	{0.863, 1.027}	0.06	0.21
heptane(1)+decane(2)	WW70P1 = Pugachevich and Belyarov (1970)	303.15	5	SIGMO	2	{6.858, 1.122}	0.09	0.29
heptane(1)+decane(2)	WW70P1 = Pugachevich and Belyarov (1970)	303.15	5	RK3	3	{0.649, 0.094, -0.147}	0.05	0.18
heptane(1)+decane(2)	WW70P1 = Pugachevich and Belyarov (1970)	303.15	5	JOAC3	3	{0.044, -0.001, -0.007}	0.06	0.18
heptane(1)+decane(2)	WW70P1 = Pugachevich and Belyarov (1970)	303.15	5	SFF	3	{-0.19, 0.993, 15.566}	0.05	0.11
heptane(1)+decane(2)	WW2002ROL1 = Rolo et al. (2002)	313.15	3	EBE	1	{0.824}	0.36	0.56
heptane(1)+decane(2)	WW2002ROL1 = Rolo et al. (2002)	313.15	3	WSD	1	{1.023}	0.39	0.6
heptane(1)+decane(2)	WW2002ROL1 = Rolo et al. (2002)	313.15	3	JOAC1	1	{0.056}	0.42	0.63
heptane(1)+decane(2)	WW2002ROL1 = Rolo et al. (2002)	313.15	3	BCRG	1	{0.677}	0.35	0.53
heptane(1)+decane(2)	WW2002ROL1 = Rolo et al. (2002)	313.15	3	CW	2	{0.942, 0.103}	0.13	0.37
heptane(1)+decane(2)	WW2002ROL1 = Rolo et al. (2002)	313.15	3	RK2	2	{0.744, -1.268}	0.01	0.03
heptane(1)+decane(2)	WW2002ROL1 = Rolo et al. (2002)	313.15	3	JOAC2	2	{0.056, 0.066}	0.01	0.01
heptane(1)+decane(2)	WW2002ROL1 = Rolo et al. (2002)	313.15	3	FLW	2	{1.057, 0.923}	0.4	1.05
heptane(1)+decane(2)	WW2002ROL1 = Rolo et al. (2002)	313.15	3	QYDH	2	{0.67, 0.732}	0.03	0.09
heptane(1)+decane(2)	WW2002ROL1 = Rolo et al. (2002)	313.15	3	SIGMO	2	{6.823, 1.147}	0.48	0.75
heptane(1)+decane(2)	WW2002ROL1 = Rolo et al. (2002)	313.15	3	RK3	3	{0.767, -1.268, -0.091}	0	0
heptane(1)+decane(2)	WW2002ROL1 = Rolo et al. (2002)	313.15	3	JOAC3	3	{0.056, 0.066, 0.002}	0	0
heptane(1)+decane(2)	WW2002ROL1 = Rolo et al. (2002)	313.15	3	SFF	3	{0.174, -0.671, 0.864}	0	0
heptane(1)+decane(2)	WW70P1 = Pugachevich and Belyarov (1970)	313.15	5	EBE	1	{0.61}	0.52	1.27
heptane(1)+decane(2)	WW70P1 = Pugachevich and Belyarov (1970)	313.15	5	WSD	1	{1.042}	0.63	1.02
heptane(1)+decane(2)	WW70P1 = Pugachevich and Belyarov (1970)	313.15	5	JOAC1	1	{0.087}	0.67	1.11
heptane(1)+decane(2)	WW70P1 = Pugachevich and Belyarov (1970)	313.15	5	BCRG	1	{0.38}	0.49	1.18
heptane(1)+decane(2)	WW70P1 = Pugachevich and Belyarov (1970)	313.15	5	CW	2	{0.874, 0.157}	0.36	0.88
heptane(1)+decane(2)	WW70P1 = Pugachevich and Belyarov (1970)	313.15	5	RK2	2	{1.302, -1.268}	0.38	0.71
heptane(1)+decane(2)	WW70P1 = Pugachevich and Belyarov (1970)	313.15	5	JOAC2	2	{0.082, 0.071}	0.39	0.75
heptane(1)+decane(2)	WW70P1 = Pugachevich and Belyarov (1970)	313.15	5	FLW	2	{1.713, 0.571}	0.64	1.86
heptane(1)+decane(2)	WW70P1 = Pugachevich and Belyarov (1970)	313.15	5	QYDH	2	{0.577, 0.735}	0.41	0.82
heptane(1)+decane(2)	WW70P1 = Pugachevich and Belyarov (1970)	313.15	5	SIGMO	2	{6.738, 1.246}	0.7	1.46
heptane(1)+decane(2)	WW70P1 = Pugachevich and Belyarov (1970)	313.15	5	RK3	3	{0.684, -0.371, 2.643}	0.25	1.05
heptane(1)+decane(2)	WW70P1 = Pugachevich and Belyarov (1970)	313.15	5	JOAC3	3	{0.051, 0.035, 0.143}	0.25	0.9
heptane(1)+decane(2)	WW70P1 = Pugachevich and Belyarov (1970)	313.15	5	SFF	3	{-0.2, -0.704, 3.348}	0.33	0.84
heptane(1)+decane(2)	WW2002ROL1 = Rolo et al. (2002)	323.15	3	EBE	1	{0.744}	0.43	0.71
heptane(1)+decane(2)	WW2002ROL1 = Rolo et al. (2002)	323.15	3	WSD	1	{1.037}	0.49	0.79
heptane(1)+decane(2)	WW2002ROL1 = Rolo et al. (2002)	323.15	3	JOAC1	1	{0.084}	0.54	0.88
heptane(1)+decane(2)	WW2002ROL1 = Rolo et al. (2002)	323.15	3	BCRG	1	{0.552}	0.41	0.68
heptane(1)+decane(2)	WW2002ROL1 = Rolo et al. (2002)	323.15	3	CW	2	{0.892, 0.162}	0.12	0.34
heptane(1)+decane(2)	WW2002ROL1 = Rolo et al. (2002)	323.15	3	RK2	2	{1.25, -1.532}	0.02	0.05
heptane(1)+decane(2)	WW2002ROL1 = Rolo et al. (2002)	323.15	3	JOAC2	2	{0.088, 0.086}	0.04	0.11
heptane(1)+decane(2)	WW2002ROL1 = Rolo et al. (2002)	323.15	3	FLW	2	{1.177, 0.828}	0.49	1.26
heptane(1)+decane(2)	WW2002ROL1 = Rolo et al. (2002)	323.15	3	QYDH	2	{0.59, 0.707}	0.05	0.15
heptane(1)+decane(2)	WW2002ROL1 = Rolo et al. (2002)	323.15	3	SIGMO	2	{6.534, 1.228}	0.63	0.97
heptane(1)+decane(2)	WW2002ROL1 = Rolo et al. (2002)	323.15	3	RK3	3	{1.207, -1.532, 0.174}	0	0
heptane(1)+decane(2)	WW2002ROL1 = Rolo et al. (2002)	323.15	3	JOAC3	3	{0.084, 0.086, 0.018}	0.01	0.01
heptane(1)+decane(2)	WW2002ROL1 = Rolo et al. (2002)	323.15	3	SFF	3	{0.015, -0.717, 1.218}	0	0
heptane(1)+decane(2)	WW70P1 = Pugachevich and Belyarov (1970)	323.15	5	EBE	1	{0.642}	0.64	1.3
heptane(1)+decane(2)	WW70P1 = Pugachevich and Belyarov (1970)	323.15	5	WSD	1	{1.044}	0.74	1.2
heptane(1)+decane(2)	WW70P1 = Pugachevich and Belyarov (1970)	323.15	5	JOAC1	1	{0.091}	0.78	1.39
heptane(1)+decane(2)	WW70P1 = Pugachevich and Belyarov (1970)	323.15	5	BCRG	1	{0.426}	0.62	1.19
heptane(1)+decane(2)	WW70P1 = Pugachevich and Belyarov (1970)	323.15	5	CW	2	{0.961, 0.098}	0.46	1.47
heptane(1)+decane(2)	WW70P1 = Pugachevich and Belyarov (1970)	323.15	5	RK2	2	{1.057, -1.289}	0.47	1.04
heptane(1)+decane(2)	WW70P1 = Pugachevich and Belyarov (1970)	323.15	5	JOAC2	2	{0.076, 0.075}	0.48	1.01
heptane(1)+decane(2)	WW70P1 = Pugachevich and Belyarov (1970)	323.15	5	FLW	2	{1.668, 0.587}	0.76	1.99
heptane(1)+decane(2)	WW70P1 = Pugachevich and Belyarov (1970)	323.15	5	QYDH	2	{0.611, 0.716}	0.52	1.04
heptane(1)+decane(2)	WW70P1 = Pugachevich and Belyarov (1970)	323.15	5	SIGMO	2	{7.37, 1.112}	0.8	2.27
heptane(1)+decane(2)	WW70P1 = Pugachevich and Belyarov (1970)	323.15	5	RK3	3	{0.585, -0.237, 2.561}	0.38	1.47
heptane(1)+decane(2)	WW70P1 = Pugachevich and Belyarov (1970)	323.15	5	JOAC3	3	{0.05, 0.022, 0.133}	0.37	1.44
heptane(1)+decane(2)	WW70P1 = Pugachevich and Belyarov (1970)	323.15	5	SFF	3	{-0.126, -0.692, 3.35}	0.42	1.31
heptane(1)+decane(2)	WW2002ROL1 = Rolo et al. (2002)	333.15	3	EBE	1	{0.669}	0.21	0.4
heptane(1)+decane(2)	WW2002ROL1 = Rolo et al. (2002)	333.15	3	WSD	1	{1.05}	0.32	0.53
heptane(1)+decane(2)	WW2002ROL1 = Rolo et al. (2002)	333.15	3	JOAC1	1	{0.111}	0.39	0.63
heptane(1)+decane(2)	WW2002ROL1 = Rolo et al. (2002)	333.15	3	BCRG	1	{0.443}	0.17	0.36
heptane(1)+decane(2)	WW2002ROL1 = Rolo et al. (2002)	333.15	3	CW	2	{0.569, 0.284}	0.1	0.28
heptane(1)+decane(2)	WW2002ROL1 = Rolo et al. (2002)	333.15	3	RK2	2	{1.544, -0.969}	0.04	0.11
heptane(1)+decane(2)	WW2002ROL1 = Rolo et al. (2002)	333.15	3	JOAC2	2	{0.109, 0.062}	0.02	0.06
heptane(1)+decane(2)	WW2002ROL1 = Rolo et al. (2002)	333.15	3	FLW	2	{1.337, 0.732}	0.28	0.86
heptane(1)+decane(2)	WW2002ROL1 = Rolo et al. (2002)	333.15	3	QYDH	2	{0.611, 0.846}	0.03	0.08
heptane(1)+decane(2)	WW2002ROL1 = Rolo et al. (2002)	333.15	3	SIGMO	2	{6.205, 1.318}	0.49	0.85
heptane(1)+decane(2)	WW2002ROL1 = Rolo et al. (2002)	333.15	3	RK3	3	{1.626, -0.967, -0.327}	0	0
heptane(1)+decane(2)	WW2002ROL1 = Rolo et al. (2002)	333.15	3	JOAC3	3	{0.111, 0.062, -0.01}	0.01	0.01
heptane(1)+decane(2)	WW2002ROL1 = Rolo et al. (2002)	333.15	3	SFF	3	{32.433, -32.99, 0.007}	0.03	0.08
heptane(1)+decane(2)	WW70P1 = Pugachevich and Belyarov (1970)	333.15	5	EBE	1	{0.63}	0.67	1.3
heptane(1)+decane(2)	WW70P1 = Pugachevich and Belyarov (1970)	333.15	5	WSD	1	{1.051}	0.77	1.29
heptane(1)+decane(2)	WW70P1 = Pugachevich and Belyarov (1970)	333.15	5	JOAC1	1	{0.106}	0.82	1.4
heptane(1)+decane(2)	WW70P1 = Pugachevich and Belyarov (1970)	333.15	5	BCRG	1	{0.411}	0.65	1.18
heptane(1)+decane(2)	WW70P1 = Pugachevich and Belyarov (1970)	333.15	5	CW	2	{0.909, 0.126}	0.49	1.48
heptane(1)+decane(2)	WW70P1 = Pugachevich and Belyarov (1970)	333.15	5	RK2	2	{1.172, -1.249}	0.51	1.12
heptane(1)+decane(2)	WW70P1 = Pugachevich and Belyarov (1970)	333.15	5	JOAC2	2	{0.087, 0.078}	0.52	1.07
heptane(1)+decane(2)	WW70P1 = Pugachevich and Belyarov (1970)	333.15	5	FLW	2	{1.847, 0.538}	0.79	2.01
heptane(1)+decane(2)	WW70P1 = Pugachevich and Belyarov (1970)	333.15	5	QYDH	2	{0.602, 0.734}	0.55	1.13
heptane(1)+decane(2)	WW70P1 = Pugachevich and Belyarov (1970)	333.15	5	SIGMO	2	{7.067, 1.264}	0.85	1.81
heptane(1)+decane(2)	WW70P1 = Pugachevich and Belyarov (1970)	333.15	5	RK3	3	{0.679, -0.152, 2.669}	0.41	1.58
heptane(1)+decane(2)	WW70P1 = Pugachevich and Belyarov (1970)	333.15	5	JOAC3	3	{0.059, 0.02, 0.145}	0.4	1.54
heptane(1)+decane(2)	WW70P1 = Pugachevich and Belyarov (1970)	333.15	5	SFF	3	{-0.161, -0.67, 3.341}	0.46	1.39
heptane(1)+decane(2)	WW70P1 = Pugachevich and Belyarov (1970)	343.15	5	EBE	1	{0.547}	0.76	1.34
heptane(1)+decane(2)	WW70P1 = Pugachevich and Belyarov (1970)	343.15	5	WSD	1	{1.072}	0.96	1.49
heptane(1)+decane(2)	WW70P1 = Pugachevich and Belyarov (1970)	343.15	5	JOAC1	1	{0.145}	1.04	1.78
heptane(1)+decane(2)	WW70P1 = Pugachevich and Belyarov (1970)	343.15	5	BCRG	1	{0.315}	0.72	1.12
heptane(1)+decane(2)	WW70P1 = Pugachevich and Belyarov (1970)	343.15	5	CW	2	{0.866, 0.199}	0.55	1.56
heptane(1)+decane(2)	WW70P1 = Pugachevich and Belyarov (1970)	343.15	5	RK2	2	{1.683, -1.795}	0.56	1.34
heptane(1)+decane(2)	WW70P1 = Pugachevich and Belyarov (1970)	343.15	5	JOAC2	2	{0.126, 0.119}	0.57	1.4
heptane(1)+decane(2)	WW70P1 = Pugachevich and Belyarov (1970)	343.15	5	FLW	2	{2.152, 0.463}	0.87	2.04
heptane(1)+decane(2)	WW70P1 = Pugachevich and Belyarov (1970)	343.15	5	QYDH	2	{0.516, 0.665}	0.6	1.5
heptane(1)+decane(2)	WW70P1 = Pugachevich and Belyarov (1970)	343.15	5	SIGMO	2	{6.795, 1.367}	1.06	2.19
heptane(1)+decane(2)	WW70P1 = Pugachevich and Belyarov (1970)	343.15	5	RK3	3	{1.304, -0.37, 2.905}	0.49	1.63
heptane(1)+decane(2)	WW70P1 = Pugachevich and Belyarov (1970)	343.15	5	JOAC3	3	{0.102, 0.047, 0.178}	0.47	1.46
heptane(1)+decane(2)	WW70P1 = Pugachevich and Belyarov (1970)	343.15	5	SFF	3	{-0.172, -0.802, 2.072}	0.5	1.34
heptane(1)+decane(2)	WW70P1 = Pugachevich and Belyarov (1970)	353.15	5	EBE	1	{0.475}	0.63	1.44
heptane(1)+decane(2)	WW70P1 = Pugachevich and Belyarov (1970)	353.15	5	WSD	1	{1.089}	0.98	1.92
heptane(1)+decane(2)	WW70P1 = Pugachevich and Belyarov (1970)	353.15	5	JOAC1	1	{0.177}	1.08	2.38
heptane(1)+decane(2)	WW70P1 = Pugachevich and Belyarov (1970)	353.15	5	BCRG	1	{0.242}	0.57	1.1
heptane(1)+decane(2)	WW70P1 = Pugachevich and Belyarov (1970)	353.15	5	CW	2	{0.698, 0.388}	0.51	1.18
heptane(1)+decane(2)	WW70P1 = Pugachevich and Belyarov (1970)	353.15	5	RK2	2	{2.71, -1.69}	0.55	1.03
heptane(1)+decane(2)	WW70P1 = Pugachevich and Belyarov (1970)	353.15	5	JOAC2	2	{0.199, 0.129}	0.57	1.15
heptane(1)+decane(2)	WW70P1 = Pugachevich and Belyarov (1970)	353.15	5	FLW	2	{2.528, 0.397}	0.74	2.12
heptane(1)+decane(2)	WW70P1 = Pugachevich and Belyarov (1970)	353.15	5	QYDH	2	{0.461, 0.823}	0.55	1.04
heptane(1)+decane(2)	WW70P1 = Pugachevich and Belyarov (1970)	353.15	5	SIGMO	2	{5.519, 1.435}	1.09	2.76
heptane(1)+decane(2)	WW70P1 = Pugachevich and Belyarov (1970)	353.15	5	RK3	3	{1.883, -0.802, 3.082}	0.34	1.6
heptane(1)+decane(2)	WW70P1 = Pugachevich and Belyarov (1970)	353.15	5	JOAC3	3	{0.146, 0.082, 0.202}	0.32	1.42
heptane(1)+decane(2)	WW70P1 = Pugachevich and Belyarov (1970)	353.15	5	SFF	3	{-0.474, -0.83, 3.322}	0.48	1.31
heptane(1)+docosane(2)	WW2003QUE1 = Queimada et al. (2003)	323.15	3	EBE	1	{0.648}	0.14	0.4
heptane(1)+docosane(2)	WW2003QUE1 = Queimada et al. (2003)	323.15	3	WSD	1	{1.124}	0.39	0.71
heptane(1)+docosane(2)	WW2003QUE1 = Queimada et al. (2003)	323.15	3	JOAC1	1	{0.29}	0.75	1.19
heptane(1)+docosane(2)	WW2003QUE1 = Queimada et al. (2003)	323.15	3	BCRG	1	{0.428}	0.14	0.23
heptane(1)+docosane(2)	WW2003QUE1 = Queimada et al. (2003)	323.15	3	CW	2	{0.518, 0.293}	0.14	0.36
heptane(1)+docosane(2)	WW2003QUE1 = Queimada et al. (2003)	323.15	3	RK2	2	{4.053, -1.467}	0.09	0.26
heptane(1)+docosane(2)	WW2003QUE1 = Queimada et al. (2003)	323.15	3	JOAC2	2	{0.286, 0.119}	0.03	0.09
heptane(1)+docosane(2)	WW2003QUE1 = Queimada et al. (2003)	323.15	3	FLW	2	{1.472, 0.667}	0.21	0.51
heptane(1)+docosane(2)	WW2003QUE1 = Queimada et al. (2003)	323.15	3	QYDH	2	{0.637, 0.938}	0.1	0.29
heptane(1)+docosane(2)	WW2003QUE1 = Queimada et al. (2003)	323.15	3	SIGMO	2	{5.754, 1.349}	0.73	1.32
heptane(1)+docosane(2)	WW2003QUE1 = Queimada et al. (2003)	323.15	3	RK3	3	{4.3, -1.467, -0.987}	0	0
heptane(1)+docosane(2)	WW2003QUE1 = Queimada et al. (2003)	323.15	3	JOAC3	3	{0.29, 0.119, -0.014}	0.01	0.01
heptane(1)+docosane(2)	WW2003QUE1 = Queimada et al. (2003)	323.15	3	SFF	3	{-0.088, -0.454, 0.449}	0.06	0.1
heptane(1)+docosane(2)	WW2003QUE1 = Queimada et al. (2003)	333.15	3	EBE	1	{0.607}	0.07	0.13
heptane(1)+docosane(2)	WW2003QUE1 = Queimada et al. (2003)	333.15	3	WSD	1	{1.147}	0.31	0.71
heptane(1)+docosane(2)	WW2003QUE1 = Queimada et al. (2003)	333.15	3	JOAC1	1	{0.338}	0.76	1.46
heptane(1)+docosane(2)	WW2003QUE1 = Queimada et al. (2003)	333.15	3	BCRG	1	{0.366}	0.15	0.27
heptane(1)+docosane(2)	WW2003QUE1 = Queimada et al. (2003)	333.15	3	CW	2	{0.343, 0.414}	0.06	0.18
heptane(1)+docosane(2)	WW2003QUE1 = Queimada et al. (2003)	333.15	3	RK2	2	{5.147, -1.067}	0.08	0.25
heptane(1)+docosane(2)	WW2003QUE1 = Queimada et al. (2003)	333.15	3	JOAC2	2	{0.356, 0.121}	0.16	0.46
heptane(1)+docosane(2)	WW2003QUE1 = Queimada et al. (2003)	333.15	3	FLW	2	{2.192, 0.499}	0.23	0.66
heptane(1)+docosane(2)	WW2003QUE1 = Queimada et al. (2003)	333.15	3	QYDH	2	{0.61, 1.021}	0.06	0.17
heptane(1)+docosane(2)	WW2003QUE1 = Queimada et al. (2003)	333.15	3	SIGMO	2	{5.959, 1.399}	0.68	1.18
heptane(1)+docosane(2)	WW2003QUE1 = Queimada et al. (2003)	333.15	3	RK3	3	{4.92, -1.067, 0.907}	0	0
heptane(1)+docosane(2)	WW2003QUE1 = Queimada et al. (2003)	333.15	3	JOAC3	3	{0.338, 0.121, 0.073}	0.01	0.01
heptane(1)+docosane(2)	WW2003QUE1 = Queimada et al. (2003)	333.15	3	SFF	3	{-0.448, -0.247, 2.822}	0	0
heptane(1)+docosane(2)	WW2003QUE1 = Queimada et al. (2003)	343.15	3	EBE	1	{0.563}	0.3	0.56
heptane(1)+docosane(2)	WW2003QUE1 = Queimada et al. (2003)	343.15	3	WSD	1	{1.182}	0.21	0.58
heptane(1)+docosane(2)	WW2003QUE1 = Queimada et al. (2003)	343.15	3	JOAC1	1	{0.41}	0.78	1.59
heptane(1)+docosane(2)	WW2003QUE1 = Queimada et al. (2003)	343.15	3	BCRG	1	{0.307}	0.47	0.72
heptane(1)+docosane(2)	WW2003QUE1 = Queimada et al. (2003)	343.15	3	CW	2	{0.181, 0.534}	0.11	0.33
heptane(1)+docosane(2)	WW2003QUE1 = Queimada et al. (2003)	343.15	3	RK2	2	{6.16, -0.613}	0.11	0.34
heptane(1)+docosane(2)	WW2003QUE1 = Queimada et al. (2003)	343.15	3	JOAC2	2	{0.433, 0.125}	0.2	0.59
heptane(1)+docosane(2)	WW2003QUE1 = Queimada et al. (2003)	343.15	3	FLW	2	{2.451, 0.46}	0.3	0.52
heptane(1)+docosane(2)	WW2003QUE1 = Queimada et al. (2003)	343.15	3	QYDH	2	{0.597, 1.115}	0.08	0.22
heptane(1)+docosane(2)	WW2003QUE1 = Queimada et al. (2003)	343.15	3	SIGMO	2	{5.782, 1.474}	0.59	1.11
heptane(1)+docosane(2)	WW2003QUE1 = Queimada et al. (2003)	343.15	3	RK3	3	{5.86, -0.613, 1.2}	0	0
heptane(1)+docosane(2)	WW2003QUE1 = Queimada et al. (2003)	343.15	3	JOAC3	3	{0.41, 0.125, 0.094}	0.01	0.01
heptane(1)+docosane(2)	WW2003QUE1 = Queimada et al. (2003)	343.15	3	SFF	3	{-0.558, -0.207, 4.335}	0.04	0.1
heptane(1)+eicosane(2)	WW2003QUE1 = Queimada et al. (2003)	313.15	3	EBE	1	{0.715}	0.09	0.2
heptane(1)+eicosane(2)	WW2003QUE1 = Queimada et al. (2003)	313.15	3	WSD	1	{1.088}	0.05	0.09
heptane(1)+eicosane(2)	WW2003QUE1 = Queimada et al. (2003)	313.15	3	JOAC1	1	{0.211}	0.27	0.43
heptane(1)+eicosane(2)	WW2003QUE1 = Queimada et al. (2003)	313.15	3	BCRG	1	{0.509}	0.14	0.28
heptane(1)+eicosane(2)	WW2003QUE1 = Queimada et al. (2003)	313.15	3	CW	2	{0.109, 0.31}	0.01	0.04
heptane(1)+eicosane(2)	WW2003QUE1 = Queimada et al. (2003)	313.15	3	RK2	2	{3.007, -0.174}	0.01	0.03
heptane(1)+eicosane(2)	WW2003QUE1 = Queimada et al. (2003)	313.15	3	JOAC2	2	{0.212, 0.044}	0.01	0.03
heptane(1)+eicosane(2)	WW2003QUE1 = Queimada et al. (2003)	313.15	3	FLW	2	{1.934, 0.568}	0.16	0.45
heptane(1)+eicosane(2)	WW2003QUE1 = Queimada et al. (2003)	313.15	3	QYDH	2	{0.737, 1.033}	0.03	0.08
heptane(1)+eicosane(2)	WW2003QUE1 = Queimada et al. (2003)	313.15	3	SIGMO	2	{7.603, 1.262}	0.32	0.57
heptane(1)+eicosane(2)	WW2003QUE1 = Queimada et al. (2003)	313.15	3	RK3	3	{3.04, -0.174, -0.132}	0	0
heptane(1)+eicosane(2)	WW2003QUE1 = Queimada et al. (2003)	313.15	3	JOAC3	3	{0.211, 0.044, 0.005}	0	0
heptane(1)+eicosane(2)	WW2003QUE1 = Queimada et al. (2003)	313.15	3	SFF	3	{-0.293, -0.052, 0.503}	0.01	0.02
heptane(1)+eicosane(2)	WW2003QUE1 = Queimada et al. (2003)	323.15	3	EBE	1	{0.656}	0.27	0.57
heptane(1)+eicosane(2)	WW2003QUE1 = Queimada et al. (2003)	323.15	3	WSD	1	{1.111}	0.33	0.52
heptane(1)+eicosane(2)	WW2003QUE1 = Queimada et al. (2003)	323.15	3	JOAC1	1	{0.238}	0.45	1.35
heptane(1)+eicosane(2)	WW2003QUE1 = Queimada et al. (2003)	323.15	3	BCRG	1	{0.438}	0.27	0.44
heptane(1)+eicosane(2)	WW2003QUE1 = Queimada et al. (2003)	323.15	3	CW	2	{0.218, 0.388}	0.26	0.78
heptane(1)+eicosane(2)	WW2003QUE1 = Queimada et al. (2003)	323.15	3	RK2	2	{4.046, -0.495}	0.26	0.79
heptane(1)+eicosane(2)	WW2003QUE1 = Queimada et al. (2003)	323.15	3	JOAC2	2	{0.274, 0.072}	0.3	0.9
heptane(1)+eicosane(2)	WW2003QUE1 = Queimada et al. (2003)	323.15	3	FLW	2	{1.066, 0.807}	0.47	1.38
heptane(1)+eicosane(2)	WW2003QUE1 = Queimada et al. (2003)	323.15	3	QYDH	2	{0.664, 1.04}	0.25	0.73
heptane(1)+eicosane(2)	WW2003QUE1 = Queimada et al. (2003)	323.15	3	SIGMO	2	{6.564, 1.285}	0.48	1.26
heptane(1)+eicosane(2)	WW2003QUE1 = Queimada et al. (2003)	323.15	3	RK3	3	{3.32, -0.489, 2.915}	0	0
heptane(1)+eicosane(2)	WW2003QUE1 = Queimada et al. (2003)	323.15	3	JOAC3	3	{0.238, 0.072, 0.145}	0	0
heptane(1)+eicosane(2)	WW2003QUE1 = Queimada et al. (2003)	323.15	3	SFF	3	{-0.411, -0.161, 4.146}	0.22	0.62
heptane(1)+eicosane(2)	WW2003QUE1 = Queimada et al. (2003)	333.15	3	EBE	1	{0.631}	0.12	0.31
heptane(1)+eicosane(2)	WW2003QUE1 = Queimada et al. (2003)	333.15	3	WSD	1	{1.129}	0.19	0.54
heptane(1)+eicosane(2)	WW2003QUE1 = Queimada et al. (2003)	333.15	3	JOAC1	1	{0.297}	0.55	1.19
heptane(1)+eicosane(2)	WW2003QUE1 = Queimada et al. (2003)	333.15	3	BCRG	1	{0.396}	0.19	0.43
heptane(1)+eicosane(2)	WW2003QUE1 = Queimada et al. (2003)	333.15	3	CW	2	{0.226, 0.424}	0.11	0.32
heptane(1)+eicosane(2)	WW2003QUE1 = Queimada et al. (2003)	333.15	3	RK2	2	{4.526, -0.576}	0.12	0.34
heptane(1)+eicosane(2)	WW2003QUE1 = Queimada et al. (2003)	333.15	3	JOAC2	2	{0.317, 0.088}	0.17	0.5
heptane(1)+eicosane(2)	WW2003QUE1 = Queimada et al. (2003)	333.15	3	FLW	2	{2.345, 0.481}	0.28	0.78
heptane(1)+eicosane(2)	WW2003QUE1 = Queimada et al. (2003)	333.15	3	QYDH	2	{0.64, 1.052}	0.09	0.27
heptane(1)+eicosane(2)	WW2003QUE1 = Queimada et al. (2003)	333.15	3	SIGMO	2	{5.666, 1.365}	0.53	1
heptane(1)+eicosane(2)	WW2003QUE1 = Queimada et al. (2003)	333.15	3	RK3	3	{4.22, -0.574, 1.227}	0	0
heptane(1)+eicosane(2)	WW2003QUE1 = Queimada et al. (2003)	333.15	3	JOAC3	3	{0.297, 0.088, 0.079}	0	0
heptane(1)+eicosane(2)	WW2003QUE1 = Queimada et al. (2003)	333.15	3	SFF	3	{-0.447, -1.962, 11.929}	0.01	0.02
heptane(1)+eicosane(2)	WW2003QUE1 = Queimada et al. (2003)	343.15	3	EBE	1	{0.55}	0.79	2.02
heptane(1)+eicosane(2)	WW2003QUE1 = Queimada et al. (2003)	343.15	3	WSD	1	{1.166}	0.37	0.75
heptane(1)+eicosane(2)	WW2003QUE1 = Queimada et al. (2003)	343.15	3	JOAC1	1	{0.381}	0.31	0.75
heptane(1)+eicosane(2)	WW2003QUE1 = Queimada et al. (2003)	343.15	3	BCRG	1	{0.292}	0.96	2.42
heptane(1)+eicosane(2)	WW2003QUE1 = Queimada et al. (2003)	343.15	3	CW	2	{-0.362, 0.6}	0.27	0.81
heptane(1)+eicosane(2)	WW2003QUE1 = Queimada et al. (2003)	343.15	3	RK2	2	{4.953, 0.759}	0.26	0.77
heptane(1)+eicosane(2)	WW2003QUE1 = Queimada et al. (2003)	343.15	3	JOAC2	2	{0.361, 0.04}	0.23	0.68
heptane(1)+eicosane(2)	WW2003QUE1 = Queimada et al. (2003)	343.15	3	FLW	2	{0.715, 0.984}	0.06	0.15
heptane(1)+eicosane(2)	WW2003QUE1 = Queimada et al. (2003)	343.15	3	QYDH	2	{0.692, 1.212}	0.28	0.85
heptane(1)+eicosane(2)	WW2003QUE1 = Queimada et al. (2003)	343.15	3	SIGMO	2	{4.213, 1.436}	0.36	0.66
heptane(1)+eicosane(2)	WW2003QUE1 = Queimada et al. (2003)	343.15	3	RK3	3	{5.62, 0.754, -2.68}	0	0
heptane(1)+eicosane(2)	WW2003QUE1 = Queimada et al. (2003)	343.15	3	JOAC3	3	{0.388, 0.04, -0.109}	0.01	0.01
heptane(1)+eicosane(2)	WW2003QUE1 = Queimada et al. (2003)	343.15	3	SFF	3	{-0.582, 1.938, 9.975}	0.08	0.25
heptane(1)+hexadecane(2)	WW2002ROL1 = Rolo et al. (2002)	293.15	3	EBE	1	{0.794}	0.06	0.12
heptane(1)+hexadecane(2)	WW2002ROL1 = Rolo et al. (2002)	293.15	3	WSD	1	{1.049}	0.12	0.2
heptane(1)+hexadecane(2)	WW2002ROL1 = Rolo et al. (2002)	293.15	3	JOAC1	1	{0.12}	0.22	0.33
heptane(1)+hexadecane(2)	WW2002ROL1 = Rolo et al. (2002)	293.15	3	BCRG	1	{0.63}	0.04	0.1
heptane(1)+hexadecane(2)	WW2002ROL1 = Rolo et al. (2002)	293.15	3	CW	2	{0.304, 0.194}	0.03	0.09
heptane(1)+hexadecane(2)	WW2002ROL1 = Rolo et al. (2002)	293.15	3	RK2	2	{1.687, -0.438}	0.02	0.05
heptane(1)+hexadecane(2)	WW2002ROL1 = Rolo et al. (2002)	293.15	3	JOAC2	2	{0.12, 0.034}	0	0
heptane(1)+hexadecane(2)	WW2002ROL1 = Rolo et al. (2002)	293.15	3	FLW	2	{1.279, 0.775}	0.21	0.37
heptane(1)+hexadecane(2)	WW2002ROL1 = Rolo et al. (2002)	293.15	3	QYDH	2	{0.782, 0.971}	0.01	0.03
heptane(1)+hexadecane(2)	WW2002ROL1 = Rolo et al. (2002)	293.15	3	SIGMO	2	{6.592, 1.176}	0.3	0.55
heptane(1)+hexadecane(2)	WW2002ROL1 = Rolo et al. (2002)	293.15	3	RK3	3	{1.74, -0.438, -0.146}	0	0
heptane(1)+hexadecane(2)	WW2002ROL1 = Rolo et al. (2002)	293.15	3	JOAC3	3	{0.12, 0.034, 0.}	0	0
heptane(1)+hexadecane(2)	WW2002ROL1 = Rolo et al. (2002)	293.15	3	SFF	3	{-0.114, -0.16, 0.477}	0	0.01
heptane(1)+hexadecane(2)	WW2011MOH3 = Mohsen-Nia (2011)	293.15	7	EBE	1	{0.853}	0.98	3.86
heptane(1)+hexadecane(2)	WW2011MOH3 = Mohsen-Nia (2011)	293.15	7	WSD	1	{1.03}	0.96	3.83
heptane(1)+hexadecane(2)	WW2011MOH3 = Mohsen-Nia (2011)	293.15	7	JOAC1	1	{0.077}	0.9	3.76
heptane(1)+hexadecane(2)	WW2011MOH3 = Mohsen-Nia (2011)	293.15	7	BCRG	1	{0.728}	0.98	3.87
heptane(1)+hexadecane(2)	WW2011MOH3 = Mohsen-Nia (2011)	293.15	7	CW	2	{-6.492, 0.577}	0.86	3.63
heptane(1)+hexadecane(2)	WW2011MOH3 = Mohsen-Nia (2011)	293.15	7	RK2	2	{0.854, 2.396}	0.69	2.94
heptane(1)+hexadecane(2)	WW2011MOH3 = Mohsen-Nia (2011)	293.15	7	JOAC2	2	{0.062, -0.053}	0.71	3.22
heptane(1)+hexadecane(2)	WW2011MOH3 = Mohsen-Nia (2011)	293.15	7	FLW	2	{4.115, 0.347}	0.17	0.45
heptane(1)+hexadecane(2)	WW2011MOH3 = Mohsen-Nia (2011)	293.15	7	QYDH	2	{1.051, 1.211}	0.75	3.32
heptane(1)+hexadecane(2)	WW2011MOH3 = Mohsen-Nia (2011)	293.15	7	SIGMO	2	{0.333, 1.32}	0.77	3.36
heptane(1)+hexadecane(2)	WW2011MOH3 = Mohsen-Nia (2011)	293.15	7	RK3	3	{1.024, 2.5, -4.762}	0.28	1.68
heptane(1)+hexadecane(2)	WW2011MOH3 = Mohsen-Nia (2011)	293.15	7	JOAC3	3	{0.077, -0.098, -0.209}	0.31	1.8
heptane(1)+hexadecane(2)	WW2011MOH3 = Mohsen-Nia (2011)	293.15	7	SFF	3	{-0.197, 2.705, 6.057}	0.04	0.12
heptane(1)+hexadecane(2)	WW58K1 = Koefoed and Villadsen (1958)	293.35	4	EBE	1	{0.729}	0.11	0.28
heptane(1)+hexadecane(2)	WW58K1 = Koefoed and Villadsen (1958)	293.35	4	WSD	1	{1.058}	0.08	0.15
heptane(1)+hexadecane(2)	WW58K1 = Koefoed and Villadsen (1958)	293.35	4	JOAC1	1	{0.137}	0.13	0.27
heptane(1)+hexadecane(2)	WW58K1 = Koefoed and Villadsen (1958)	293.35	4	BCRG	1	{0.529}	0.15	0.35
heptane(1)+hexadecane(2)	WW58K1 = Koefoed and Villadsen (1958)	293.35	4	CW	2	{0.135, 0.292}	0.06	0.22
heptane(1)+hexadecane(2)	WW58K1 = Koefoed and Villadsen (1958)	293.35	4	RK2	2	{2.217, -0.183}	0.06	0.22
heptane(1)+hexadecane(2)	WW58K1 = Koefoed and Villadsen (1958)	293.35	4	JOAC2	2	{0.137, 0.024}	0.06	0.18
heptane(1)+hexadecane(2)	WW58K1 = Koefoed and Villadsen (1958)	293.35	4	FLW	2	{1.827, 0.579}	0.16	0.51
heptane(1)+hexadecane(2)	WW58K1 = Koefoed and Villadsen (1958)	293.35	4	QYDH	2	{0.744, 1.021}	0.07	0.22
heptane(1)+hexadecane(2)	WW58K1 = Koefoed and Villadsen (1958)	293.35	4	SIGMO	2	{6.122, 1.248}	0.2	0.49
heptane(1)+hexadecane(2)	WW58K1 = Koefoed and Villadsen (1958)	293.35	4	RK3	3	{2.225, -0.184, -0.023}	0.05	0.21
heptane(1)+hexadecane(2)	WW58K1 = Koefoed and Villadsen (1958)	293.35	4	JOAC3	3	{0.137, 0.026, 0.004}	0.05	0.21
heptane(1)+hexadecane(2)	WW58K1 = Koefoed and Villadsen (1958)	293.35	4	SFF	3	{-0.29, -0.05, 1.23}	0.06	0.22
heptane(1)+hexadecane(2)	WW2011MOH3 = Mohsen-Nia (2011)	298.15	7	EBE	1	{0.703}	0.24	0.66
heptane(1)+hexadecane(2)	WW2011MOH3 = Mohsen-Nia (2011)	298.15	7	WSD	1	{1.072}	0.22	0.52
heptane(1)+hexadecane(2)	WW2011MOH3 = Mohsen-Nia (2011)	298.15	7	JOAC1	1	{0.167}	0.22	0.52
heptane(1)+hexadecane(2)	WW2011MOH3 = Mohsen-Nia (2011)	298.15	7	BCRG	1	{0.495}	0.27	0.73
heptane(1)+hexadecane(2)	WW2011MOH3 = Mohsen-Nia (2011)	298.15	7	CW	2	{-0.084, 0.38}	0.22	0.49
heptane(1)+hexadecane(2)	WW2011MOH3 = Mohsen-Nia (2011)	298.15	7	RK2	2	{2.771, 0.271}	0.22	0.45
heptane(1)+hexadecane(2)	WW2011MOH3 = Mohsen-Nia (2011)	298.15	7	JOAC2	2	{0.164, 0.037}	0.21	0.55
heptane(1)+hexadecane(2)	WW2011MOH3 = Mohsen-Nia (2011)	298.15	7	FLW	2	{0.881, 0.986}	0.07	0.17
heptane(1)+hexadecane(2)	WW2011MOH3 = Mohsen-Nia (2011)	298.15	7	QYDH	2	{0.707, 1.012}	0.23	0.65
heptane(1)+hexadecane(2)	WW2011MOH3 = Mohsen-Nia (2011)	298.15	7	SIGMO	2	{5.527, 1.279}	0.28	0.73
heptane(1)+hexadecane(2)	WW2011MOH3 = Mohsen-Nia (2011)	298.15	7	RK3	3	{2.814, 0.113, -1.859}	0.03	0.07
heptane(1)+hexadecane(2)	WW2011MOH3 = Mohsen-Nia (2011)	298.15	7	JOAC3	3	{0.172, 0.014, -0.08}	0.02	0.08
heptane(1)+hexadecane(2)	WW2011MOH3 = Mohsen-Nia (2011)	298.15	7	SFF	3	{-0.377, 0.322, 5.897}	0.12	0.38
heptane(1)+hexadecane(2)	WW58K1 = Koefoed and Villadsen (1958)	303.05	4	EBE	1	{0.74}	0.26	0.39
heptane(1)+hexadecane(2)	WW58K1 = Koefoed and Villadsen (1958)	303.05	4	WSD	1	{1.061}	0.16	0.25
heptane(1)+hexadecane(2)	WW58K1 = Koefoed and Villadsen (1958)	303.05	4	JOAC1	1	{0.146}	0.05	0.09
heptane(1)+hexadecane(2)	WW58K1 = Koefoed and Villadsen (1958)	303.05	4	BCRG	1	{0.545}	0.28	0.44
heptane(1)+hexadecane(2)	WW58K1 = Koefoed and Villadsen (1958)	303.05	4	CW	2	{-0.55, 0.384}	0.04	0.12
heptane(1)+hexadecane(2)	WW58K1 = Koefoed and Villadsen (1958)	303.05	4	RK2	2	{2.203, 0.54}	0.04	0.09
heptane(1)+hexadecane(2)	WW58K1 = Koefoed and Villadsen (1958)	303.05	4	JOAC2	2	{0.146, -0.003}	0.04	0.1
heptane(1)+hexadecane(2)	WW58K1 = Koefoed and Villadsen (1958)	303.05	4	FLW	2	{1.882, 0.573}	0.19	0.46
heptane(1)+hexadecane(2)	WW58K1 = Koefoed and Villadsen (1958)	303.05	4	QYDH	2	{0.794, 1.1}	0.04	0.15
heptane(1)+hexadecane(2)	WW58K1 = Koefoed and Villadsen (1958)	303.05	4	SIGMO	2	{5.79, 1.236}	0.1	0.22
heptane(1)+hexadecane(2)	WW58K1 = Koefoed and Villadsen (1958)	303.05	4	RK3	3	{2.202, 0.447, 0.167}	0.04	0.15
heptane(1)+hexadecane(2)	WW58K1 = Koefoed and Villadsen (1958)	303.05	4	JOAC3	3	{0.146, 0.002, 0.008}	0.04	0.15
heptane(1)+hexadecane(2)	WW58K1 = Koefoed and Villadsen (1958)	303.05	4	SFF	3	{-0.435, 0.183, 0.448}	0.04	0.13
heptane(1)+hexadecane(2)	WW2002ROL1 = Rolo et al. (2002)	303.15	3	EBE	1	{0.732}	0.15	0.31
heptane(1)+hexadecane(2)	WW2002ROL1 = Rolo et al. (2002)	303.15	3	WSD	1	{1.06}	0.18	0.45
heptane(1)+hexadecane(2)	WW2002ROL1 = Rolo et al. (2002)	303.15	3	JOAC1	1	{0.14}	0.28	0.74
heptane(1)+hexadecane(2)	WW2002ROL1 = Rolo et al. (2002)	303.15	3	BCRG	1	{0.526}	0.12	0.37
heptane(1)+hexadecane(2)	WW2002ROL1 = Rolo et al. (2002)	303.15	3	CW	2	{0.596, 0.189}	0.11	0.32
heptane(1)+hexadecane(2)	WW2002ROL1 = Rolo et al. (2002)	303.15	3	RK2	2	{2.437, -0.5}	0.14	0.42
heptane(1)+hexadecane(2)	WW2002ROL1 = Rolo et al. (2002)	303.15	3	JOAC2	2	{0.16, 0.044}	0.17	0.5
heptane(1)+hexadecane(2)	WW2002ROL1 = Rolo et al. (2002)	303.15	3	FLW	2	{1.431, 0.693}	0.35	0.9
heptane(1)+hexadecane(2)	WW2002ROL1 = Rolo et al. (2002)	303.15	3	QYDH	2	{0.717, 0.987}	0.14	0.41
heptane(1)+hexadecane(2)	WW2002ROL1 = Rolo et al. (2002)	303.15	3	SIGMO	2	{6.48, 1.209}	0.37	0.76
heptane(1)+hexadecane(2)	WW2002ROL1 = Rolo et al. (2002)	303.15	3	RK3	3	{2.04, -0.5, 1.104}	0	0
heptane(1)+hexadecane(2)	WW2002ROL1 = Rolo et al. (2002)	303.15	3	JOAC3	3	{0.14, 0.044, 0.054}	0.01	0.01
heptane(1)+hexadecane(2)	WW2002ROL1 = Rolo et al. (2002)	303.15	3	SFF	3	{-0.269, -1.004, 10.661}	0.02	0.06
heptane(1)+hexadecane(2)	WW2011MOH3 = Mohsen-Nia (2011)	305.15	7	EBE	1	{0.703}	0.24	0.59
heptane(1)+hexadecane(2)	WW2011MOH3 = Mohsen-Nia (2011)	305.15	7	WSD	1	{1.076}	0.23	0.45
heptane(1)+hexadecane(2)	WW2011MOH3 = Mohsen-Nia (2011)	305.15	7	JOAC1	1	{0.174}	0.22	0.55
heptane(1)+hexadecane(2)	WW2011MOH3 = Mohsen-Nia (2011)	305.15	7	BCRG	1	{0.494}	0.26	0.66
heptane(1)+hexadecane(2)	WW2011MOH3 = Mohsen-Nia (2011)	305.15	7	CW	2	{-0.09, 0.381}	0.22	0.41
heptane(1)+hexadecane(2)	WW2011MOH3 = Mohsen-Nia (2011)	305.15	7	RK2	2	{2.792, 0.208}	0.22	0.46
heptane(1)+hexadecane(2)	WW2011MOH3 = Mohsen-Nia (2011)	305.15	7	JOAC2	2	{0.173, 0.043}	0.21	0.5
heptane(1)+hexadecane(2)	WW2011MOH3 = Mohsen-Nia (2011)	305.15	7	FLW	2	{0.906, 0.963}	0.06	0.17
heptane(1)+hexadecane(2)	WW2011MOH3 = Mohsen-Nia (2011)	305.15	7	QYDH	2	{0.702, 0.999}	0.24	0.6
heptane(1)+hexadecane(2)	WW2011MOH3 = Mohsen-Nia (2011)	305.15	7	SIGMO	2	{7.503, 1.276}	0.28	0.77
heptane(1)+hexadecane(2)	WW2011MOH3 = Mohsen-Nia (2011)	305.15	7	RK3	3	{2.809, -0.039, -1.661}	0.05	0.13
heptane(1)+hexadecane(2)	WW2011MOH3 = Mohsen-Nia (2011)	305.15	7	JOAC3	3	{0.181, 0.017, -0.086}	0.04	0.11
heptane(1)+hexadecane(2)	WW2011MOH3 = Mohsen-Nia (2011)	305.15	7	SFF	3	{-0.374, 0.265, 6.059}	0.14	0.41
heptane(1)+hexadecane(2)	WW2002ROL1 = Rolo et al. (2002)	313.15	3	EBE	1	{0.669}	0.47	0.87
heptane(1)+hexadecane(2)	WW2002ROL1 = Rolo et al. (2002)	313.15	3	WSD	1	{1.094}	0.46	1.29
heptane(1)+hexadecane(2)	WW2002ROL1 = Rolo et al. (2002)	313.15	3	JOAC1	1	{0.2}	0.52	0.96
heptane(1)+hexadecane(2)	WW2002ROL1 = Rolo et al. (2002)	313.15	3	BCRG	1	{0.459}	0.46	0.73
heptane(1)+hexadecane(2)	WW2002ROL1 = Rolo et al. (2002)	313.15	3	CW	2	{-0.042, 0.465}	0.46	1.37
heptane(1)+hexadecane(2)	WW2002ROL1 = Rolo et al. (2002)	313.15	3	RK2	2	{3.531, 0.073}	0.45	1.36
heptane(1)+hexadecane(2)	WW2002ROL1 = Rolo et al. (2002)	313.15	3	JOAC2	2	{0.219, 0.031}	0.49	1.44
heptane(1)+hexadecane(2)	WW2002ROL1 = Rolo et al. (2002)	313.15	3	FLW	2	{1.848, 0.562}	0.67	1.56
heptane(1)+hexadecane(2)	WW2002ROL1 = Rolo et al. (2002)	313.15	3	QYDH	2	{0.685, 1.106}	0.43	1.27
heptane(1)+hexadecane(2)	WW2002ROL1 = Rolo et al. (2002)	313.15	3	SIGMO	2	{5.007, 1.286}	0.47	0.85
heptane(1)+hexadecane(2)	WW2002ROL1 = Rolo et al. (2002)	313.15	3	RK3	3	{2.28, 0.073, 3.476}	0	0
heptane(1)+hexadecane(2)	WW2002ROL1 = Rolo et al. (2002)	313.15	3	JOAC3	3	{0.162, 0.031, 0.158}	0.01	0.01
heptane(1)+hexadecane(2)	WW2002ROL1 = Rolo et al. (2002)	313.15	3	SFF	3	{-0.497, 0.051, 0.213}	0.45	1.35
heptane(1)+hexadecane(2)	WW2011MOH3 = Mohsen-Nia (2011)	318.15	7	EBE	1	{0.724}	0.27	0.67
heptane(1)+hexadecane(2)	WW2011MOH3 = Mohsen-Nia (2011)	318.15	7	WSD	1	{1.077}	0.26	0.53
heptane(1)+hexadecane(2)	WW2011MOH3 = Mohsen-Nia (2011)	318.15	7	JOAC1	1	{0.179}	0.26	0.6
heptane(1)+hexadecane(2)	WW2011MOH3 = Mohsen-Nia (2011)	318.15	7	BCRG	1	{0.525}	0.28	0.73
heptane(1)+hexadecane(2)	WW2011MOH3 = Mohsen-Nia (2011)	318.15	7	CW	2	{-0.033, 0.337}	0.26	0.52
heptane(1)+hexadecane(2)	WW2011MOH3 = Mohsen-Nia (2011)	318.15	7	RK2	2	{2.583, 0.042}	0.26	0.53
heptane(1)+hexadecane(2)	WW2011MOH3 = Mohsen-Nia (2011)	318.15	7	JOAC2	2	{0.18, 0.05}	0.24	0.61
heptane(1)+hexadecane(2)	WW2011MOH3 = Mohsen-Nia (2011)	318.15	7	FLW	2	{0.872, 0.988}	0.08	0.16
heptane(1)+hexadecane(2)	WW2011MOH3 = Mohsen-Nia (2011)	318.15	7	QYDH	2	{0.717, 0.982}	0.27	0.71
heptane(1)+hexadecane(2)	WW2011MOH3 = Mohsen-Nia (2011)	318.15	7	SIGMO	2	{10.045, 1.243}	0.33	0.82
heptane(1)+hexadecane(2)	WW2011MOH3 = Mohsen-Nia (2011)	318.15	7	RK3	3	{2.639, -0.064, -1.911}	0.05	0.14
heptane(1)+hexadecane(2)	WW2011MOH3 = Mohsen-Nia (2011)	318.15	7	JOAC3	3	{0.188, 0.027, -0.089}	0.04	0.11
heptane(1)+hexadecane(2)	WW2011MOH3 = Mohsen-Nia (2011)	318.15	7	SFF	3	{-0.333, 0.321, 7.558}	0.17	0.45
heptane(1)+hexadecane(2)	WW2002ROL1 = Rolo et al. (2002)	323.15	3	EBE	1	{0.616}	0.88	1.54
heptane(1)+hexadecane(2)	WW2002ROL1 = Rolo et al. (2002)	323.15	3	WSD	1	{1.121}	0.88	1.81
heptane(1)+hexadecane(2)	WW2002ROL1 = Rolo et al. (2002)	323.15	3	JOAC1	1	{0.297}	0.87	2.56
heptane(1)+hexadecane(2)	WW2002ROL1 = Rolo et al. (2002)	323.15	3	BCRG	1	{0.391}	0.87	1.69
heptane(1)+hexadecane(2)	WW2002ROL1 = Rolo et al. (2002)	323.15	3	CW	2	{-0.54, 0.795}	0.82	2.45
heptane(1)+hexadecane(2)	WW2002ROL1 = Rolo et al. (2002)	323.15	3	RK2	2	{5., 1.063}	0.85	2.54
heptane(1)+hexadecane(2)	WW2002ROL1 = Rolo et al. (2002)	323.15	3	JOAC2	2	{0.299, 0.002}	0.88	2.61
heptane(1)+hexadecane(2)	WW2002ROL1 = Rolo et al. (2002)	323.15	3	FLW	2	{1.983, 0.523}	1.1	1.81
heptane(1)+hexadecane(2)	WW2002ROL1 = Rolo et al. (2002)	323.15	3	QYDH	2	{0.654, 1.273}	0.83	2.17
heptane(1)+hexadecane(2)	WW2002ROL1 = Rolo et al. (2002)	323.15	3	SIGMO	2	{1.598, 1.532}	0.78	2.34
heptane(1)+hexadecane(2)	WW2002ROL1 = Rolo et al. (2002)	323.15	3	RK3	3	{2.76, 1.063, 6.222}	0	0
heptane(1)+hexadecane(2)	WW2002ROL1 = Rolo et al. (2002)	323.15	3	JOAC3	3	{0.196, 0.002, 0.285}	0	0
heptane(1)+hexadecane(2)	WW2002ROL1 = Rolo et al. (2002)	323.15	3	SFF	3	{-1.432, 0.93, 0.163}	0.79	2.23
heptane(1)+hexadecane(2)	WW2011MOH3 = Mohsen-Nia (2011)	323.15	7	EBE	1	{0.723}	0.26	0.57
heptane(1)+hexadecane(2)	WW2011MOH3 = Mohsen-Nia (2011)	323.15	7	WSD	1	{1.081}	0.25	0.46
heptane(1)+hexadecane(2)	WW2011MOH3 = Mohsen-Nia (2011)	323.15	7	JOAC1	1	{0.189}	0.25	0.67
heptane(1)+hexadecane(2)	WW2011MOH3 = Mohsen-Nia (2011)	323.15	7	BCRG	1	{0.524}	0.27	0.64
heptane(1)+hexadecane(2)	WW2011MOH3 = Mohsen-Nia (2011)	323.15	7	CW	2	{-0.1, 0.352}	0.25	0.53
heptane(1)+hexadecane(2)	WW2011MOH3 = Mohsen-Nia (2011)	323.15	7	RK2	2	{2.625, 0.125}	0.25	0.52
heptane(1)+hexadecane(2)	WW2011MOH3 = Mohsen-Nia (2011)	323.15	7	JOAC2	2	{0.188, 0.052}	0.23	0.49
heptane(1)+hexadecane(2)	WW2011MOH3 = Mohsen-Nia (2011)	323.15	7	FLW	2	{0.87, 0.985}	0.07	0.18
heptane(1)+hexadecane(2)	WW2011MOH3 = Mohsen-Nia (2011)	323.15	7	QYDH	2	{0.718, 0.985}	0.26	0.6
heptane(1)+hexadecane(2)	WW2011MOH3 = Mohsen-Nia (2011)	323.15	7	SIGMO	2	{7.273, 1.247}	0.33	0.87
heptane(1)+hexadecane(2)	WW2011MOH3 = Mohsen-Nia (2011)	323.15	7	RK3	3	{2.633, -0.172, -1.679}	0.07	0.17
heptane(1)+hexadecane(2)	WW2011MOH3 = Mohsen-Nia (2011)	323.15	7	JOAC3	3	{0.197, 0.026, -0.096}	0.06	0.17
heptane(1)+hexadecane(2)	WW2011MOH3 = Mohsen-Nia (2011)	323.15	7	SFF	3	{-0.339, 0.218, 5.827}	0.17	0.49
heptane(1)+hexadecane(2)	WW2002ROL1 = Rolo et al. (2002)	333.15	3	EBE	1	{0.531}	1.01	1.64
heptane(1)+hexadecane(2)	WW2002ROL1 = Rolo et al. (2002)	333.15	3	WSD	1	{1.167}	1.02	2.92
heptane(1)+hexadecane(2)	WW2002ROL1 = Rolo et al. (2002)	333.15	3	JOAC1	1	{0.333}	1.15	2.33
heptane(1)+hexadecane(2)	WW2002ROL1 = Rolo et al. (2002)	333.15	3	BCRG	1	{0.294}	0.98	1.61
heptane(1)+hexadecane(2)	WW2002ROL1 = Rolo et al. (2002)	333.15	3	CW	2	{0.824, 0.256}	0.83	2.5
heptane(1)+hexadecane(2)	WW2002ROL1 = Rolo et al. (2002)	333.15	3	RK2	2	{6.031, 0.156}	1.01	3.04
heptane(1)+hexadecane(2)	WW2002ROL1 = Rolo et al. (2002)	333.15	3	JOAC2	2	{0.368, 0.058}	1.08	3.23
heptane(1)+hexadecane(2)	WW2002ROL1 = Rolo et al. (2002)	333.15	3	FLW	2	{2.284, 0.454}	1.22	2.33
heptane(1)+hexadecane(2)	WW2002ROL1 = Rolo et al. (2002)	333.15	3	QYDH	2	{0.555, 1.198}	0.98	2.41
heptane(1)+hexadecane(2)	WW2002ROL1 = Rolo et al. (2002)	333.15	3	SIGMO	2	{4.841, 1.602}	1.04	2.29
heptane(1)+hexadecane(2)	WW2002ROL1 = Rolo et al. (2002)	333.15	3	RK3	3	{3.44, 0.156, 7.198}	0	0
heptane(1)+hexadecane(2)	WW2002ROL1 = Rolo et al. (2002)	333.15	3	JOAC3	3	{0.241, 0.058, 0.353}	0	0
heptane(1)+hexadecane(2)	WW2002ROL1 = Rolo et al. (2002)	333.15	3	SFF	3	{-0.779, 0.038, 1.397}	1.02	3.05
heptane(1)+tetracosane(2)	WW2003QUE1 = Queimada et al. (2003)	323.15	3	EBE	1	{0.458}	1.5	2.29
heptane(1)+tetracosane(2)	WW2003QUE1 = Queimada et al. (2003)	323.15	3	WSD	1	{1.182}	0.78	1.53
heptane(1)+tetracosane(2)	WW2003QUE1 = Queimada et al. (2003)	323.15	3	JOAC1	1	{0.393}	0.32	0.9
heptane(1)+tetracosane(2)	WW2003QUE1 = Queimada et al. (2003)	323.15	3	BCRG	1	{0.203}	1.75	2.55
heptane(1)+tetracosane(2)	WW2003QUE1 = Queimada et al. (2003)	323.15	3	CW	2	{-1.325, 1.292}	0.11	0.33
heptane(1)+tetracosane(2)	WW2003QUE1 = Queimada et al. (2003)	323.15	3	RK2	2	{7.493, 2.987}	0.22	0.64
heptane(1)+tetracosane(2)	WW2003QUE1 = Queimada et al. (2003)	323.15	3	JOAC2	2	{0.417, -0.048}	0.22	0.66
heptane(1)+tetracosane(2)	WW2003QUE1 = Queimada et al. (2003)	323.15	3	FLW	2	{0.53, 1.112}	0.35	1.04
heptane(1)+tetracosane(2)	WW2003QUE1 = Queimada et al. (2003)	323.15	3	QYDH	2	{0.654, 1.515}	0.34	1.01
heptane(1)+tetracosane(2)	WW2003QUE1 = Queimada et al. (2003)	323.15	3	SIGMO	2	{0.274, 1.969}	0.27	0.52
heptane(1)+tetracosane(2)	WW2003QUE1 = Queimada et al. (2003)	323.15	3	RK3	3	{6.88, 2.987, 2.453}	0	0
heptane(1)+tetracosane(2)	WW2003QUE1 = Queimada et al. (2003)	323.15	3	JOAC3	3	{0.391, -0.048, 0.105}	0	0
heptane(1)+tetracosane(2)	WW2003QUE1 = Queimada et al. (2003)	323.15	3	SFF	3	{-1.039, 0.617, 1.585}	0.28	0.88
heptane(1)+tetracosane(2)	WW2003QUE1 = Queimada et al. (2003)	333.15	3	EBE	1	{0.575}	0.33	0.6
heptane(1)+tetracosane(2)	WW2003QUE1 = Queimada et al. (2003)	333.15	3	WSD	1	{1.167}	0.12	0.25
heptane(1)+tetracosane(2)	WW2003QUE1 = Queimada et al. (2003)	333.15	3	JOAC1	1	{0.379}	0.63	1.14
heptane(1)+tetracosane(2)	WW2003QUE1 = Queimada et al. (2003)	333.15	3	BCRG	1	{0.321}	0.49	0.95
heptane(1)+tetracosane(2)	WW2003QUE1 = Queimada et al. (2003)	333.15	3	CW	2	{0.129, 0.509}	0.02	0.05
heptane(1)+tetracosane(2)	WW2003QUE1 = Queimada et al. (2003)	333.15	3	RK2	2	{5.787, -0.4}	0.02	0.05
heptane(1)+tetracosane(2)	WW2003QUE1 = Queimada et al. (2003)	333.15	3	JOAC2	2	{0.389, 0.101}	0.08	0.25
heptane(1)+tetracosane(2)	WW2003QUE1 = Queimada et al. (2003)	333.15	3	FLW	2	{1.536, 0.62}	0.23	0.66
heptane(1)+tetracosane(2)	WW2003QUE1 = Queimada et al. (2003)	333.15	3	QYDH	2	{0.623, 1.11}	0.02	0.05
heptane(1)+tetracosane(2)	WW2003QUE1 = Queimada et al. (2003)	333.15	3	SIGMO	2	{5.444, 1.454}	0.5	0.76
heptane(1)+tetracosane(2)	WW2003QUE1 = Queimada et al. (2003)	333.15	3	RK3	3	{5.74, -0.4, 0.187}	0	0
heptane(1)+tetracosane(2)	WW2003QUE1 = Queimada et al. (2003)	333.15	3	JOAC3	3	{0.379, 0.101, 0.039}	0	0
heptane(1)+tetracosane(2)	WW2003QUE1 = Queimada et al. (2003)	333.15	3	SFF	3	{-0.521, -0.075, 1.957}	0	0.01
heptane(1)+tetracosane(2)	WW2003QUE1 = Queimada et al. (2003)	343.15	3	EBE	1	{0.485}	0.36	0.66
heptane(1)+tetracosane(2)	WW2003QUE1 = Queimada et al. (2003)	343.15	3	WSD	1	{1.225}	0.42	0.85
heptane(1)+tetracosane(2)	WW2003QUE1 = Queimada et al. (2003)	343.15	3	JOAC1	1	{0.491}	1.15	2.13
heptane(1)+tetracosane(2)	WW2003QUE1 = Queimada et al. (2003)	343.15	3	BCRG	1	{0.22}	0.65	1.32
heptane(1)+tetracosane(2)	WW2003QUE1 = Queimada et al. (2003)	343.15	3	CW	2	{0.314, 0.593}	0.04	0.12
heptane(1)+tetracosane(2)	WW2003QUE1 = Queimada et al. (2003)	343.15	3	RK2	2	{7.733, -1.44}	0.06	0.19
heptane(1)+tetracosane(2)	WW2003QUE1 = Queimada et al. (2003)	343.15	3	JOAC2	2	{0.514, 0.184}	0.2	0.57
heptane(1)+tetracosane(2)	WW2003QUE1 = Queimada et al. (2003)	343.15	3	FLW	2	{1.783, 0.528}	0.24	0.68
heptane(1)+tetracosane(2)	WW2003QUE1 = Queimada et al. (2003)	343.15	3	QYDH	2	{0.528, 1.122}	0	0
heptane(1)+tetracosane(2)	WW2003QUE1 = Queimada et al. (2003)	343.15	3	SIGMO	2	{5.104, 1.614}	0.78	1.33
heptane(1)+tetracosane(2)	WW2003QUE1 = Queimada et al. (2003)	343.15	3	RK3	3	{7.56, -1.44, 0.693}	0	0
heptane(1)+tetracosane(2)	WW2003QUE1 = Queimada et al. (2003)	343.15	3	JOAC3	3	{0.491, 0.184, 0.09}	0	0
heptane(1)+tetracosane(2)	WW2003QUE1 = Queimada et al. (2003)	343.15	3	SFF	3	{-0.626, -0.263, 1.963}	0	0
hexadecane(1)+eicosane(2)	WW2002ROL1 = Rolo et al. (2002)	313.15	5	EBE	1	{0.86}	0.16	0.44
hexadecane(1)+eicosane(2)	WW2002ROL1 = Rolo et al. (2002)	313.15	5	WSD	1	{1.004}	0.16	0.43
hexadecane(1)+eicosane(2)	WW2002ROL1 = Rolo et al. (2002)	313.15	5	JOAC1	1	{0.008}	0.16	0.42
hexadecane(1)+eicosane(2)	WW2002ROL1 = Rolo et al. (2002)	313.15	5	BCRG	1	{0.736}	0.16	0.44
hexadecane(1)+eicosane(2)	WW2002ROL1 = Rolo et al. (2002)	313.15	5	CW	2	{-0.975, 0.167}	0.16	0.39
hexadecane(1)+eicosane(2)	WW2002ROL1 = Rolo et al. (2002)	313.15	5	RK2	2	{0.04, 0.921}	0.15	0.45
hexadecane(1)+eicosane(2)	WW2002ROL1 = Rolo et al. (2002)	313.15	5	JOAC2	2	{0.003, -0.035}	0.15	0.45
hexadecane(1)+eicosane(2)	WW2002ROL1 = Rolo et al. (2002)	313.15	5	FLW	2	{2.288, 0.449}	0.11	0.36
hexadecane(1)+eicosane(2)	WW2002ROL1 = Rolo et al. (2002)	313.15	5	QYDH	2	{1.048, 1.111}	0.16	0.31
hexadecane(1)+eicosane(2)	WW2002ROL1 = Rolo et al. (2002)	313.15	5	SIGMO	2	{0.618, 1.156}	0.16	0.31
hexadecane(1)+eicosane(2)	WW2002ROL1 = Rolo et al. (2002)	313.15	5	RK3	3	{0.223, 0.625, -1.004}	0.09	0.27
hexadecane(1)+eicosane(2)	WW2002ROL1 = Rolo et al. (2002)	313.15	5	JOAC3	3	{0.009, -0.023, -0.038}	0.09	0.29
hexadecane(1)+eicosane(2)	WW2002ROL1 = Rolo et al. (2002)	313.15	5	SFF	3	{-0.23, 2.102, 5.571}	0.09	0.2
hexadecane(1)+eicosane(2)	WW2002ROL1 = Rolo et al. (2002)	323.15	5	EBE	1	{0.618}	0.27	0.53
hexadecane(1)+eicosane(2)	WW2002ROL1 = Rolo et al. (2002)	323.15	5	WSD	1	{1.013}	0.24	0.44
hexadecane(1)+eicosane(2)	WW2002ROL1 = Rolo et al. (2002)	323.15	5	JOAC1	1	{0.026}	0.24	0.42
hexadecane(1)+eicosane(2)	WW2002ROL1 = Rolo et al. (2002)	323.15	5	BCRG	1	{0.375}	0.28	0.56
hexadecane(1)+eicosane(2)	WW2002ROL1 = Rolo et al. (2002)	323.15	5	CW	2	{-22.956, 4.596}	0.11	0.25
hexadecane(1)+eicosane(2)	WW2002ROL1 = Rolo et al. (2002)	323.15	5	RK2	2	{0.623, 1.121}	0.07	0.18
hexadecane(1)+eicosane(2)	WW2002ROL1 = Rolo et al. (2002)	323.15	5	JOAC2	2	{0.025, -0.042}	0.07	0.17
hexadecane(1)+eicosane(2)	WW2002ROL1 = Rolo et al. (2002)	323.15	5	FLW	2	{2.317, 0.439}	0.2	0.56
hexadecane(1)+eicosane(2)	WW2002ROL1 = Rolo et al. (2002)	323.15	5	QYDH	2	{1.226, 1.756}	0.07	0.21
hexadecane(1)+eicosane(2)	WW2002ROL1 = Rolo et al. (2002)	323.15	5	SIGMO	2	{-0.105, 2.263}	0.06	0.2
hexadecane(1)+eicosane(2)	WW2002ROL1 = Rolo et al. (2002)	323.15	5	RK3	3	{0.471, 1.096, 0.38}	0.05	0.2
hexadecane(1)+eicosane(2)	WW2002ROL1 = Rolo et al. (2002)	323.15	5	JOAC3	3	{0.02, -0.041, 0.013}	0.05	0.19
hexadecane(1)+eicosane(2)	WW2002ROL1 = Rolo et al. (2002)	323.15	5	SFF	3	{-2.463, 2.682, 0.32}	0.05	0.22
hexadecane(1)+eicosane(2)	WW2002ROL1 = Rolo et al. (2002)	333.15	5	EBE	1	{0.798}	0.15	0.28
hexadecane(1)+eicosane(2)	WW2002ROL1 = Rolo et al. (2002)	333.15	5	WSD	1	{1.008}	0.15	0.28
hexadecane(1)+eicosane(2)	WW2002ROL1 = Rolo et al. (2002)	333.15	5	JOAC1	1	{0.016}	0.14	0.27
hexadecane(1)+eicosane(2)	WW2002ROL1 = Rolo et al. (2002)	333.15	5	BCRG	1	{0.638}	0.15	0.3
hexadecane(1)+eicosane(2)	WW2002ROL1 = Rolo et al. (2002)	333.15	5	CW	2	{-5.298, 0.96}	0.1	0.23
hexadecane(1)+eicosane(2)	WW2002ROL1 = Rolo et al. (2002)	333.15	5	RK2	2	{0.459, 0.504}	0.09	0.24
hexadecane(1)+eicosane(2)	WW2002ROL1 = Rolo et al. (2002)	333.15	5	JOAC2	2	{0.02, -0.019}	0.09	0.23
hexadecane(1)+eicosane(2)	WW2002ROL1 = Rolo et al. (2002)	333.15	5	FLW	2	{1.322, 0.753}	0.11	0.46
hexadecane(1)+eicosane(2)	WW2002ROL1 = Rolo et al. (2002)	333.15	5	QYDH	2	{0.939, 1.319}	0.1	0.21
hexadecane(1)+eicosane(2)	WW2002ROL1 = Rolo et al. (2002)	333.15	5	SIGMO	2	{0.353, 1.446}	0.1	0.21
hexadecane(1)+eicosane(2)	WW2002ROL1 = Rolo et al. (2002)	333.15	5	RK3	3	{0.52, 0.717, -0.458}	0.06	0.32
hexadecane(1)+eicosane(2)	WW2002ROL1 = Rolo et al. (2002)	333.15	5	JOAC3	3	{0.023, -0.028, -0.019}	0.07	0.33
hexadecane(1)+eicosane(2)	WW2002ROL1 = Rolo et al. (2002)	333.15	5	SFF	3	{-0.525, 0.958, 2.306}	0.06	0.31
hexadecane(1)+eicosane(2)	WW2002ROL1 = Rolo et al. (2002)	343.15	5	EBE	1	{0.597}	0.28	0.45
hexadecane(1)+eicosane(2)	WW2002ROL1 = Rolo et al. (2002)	343.15	5	WSD	1	{1.016}	0.26	0.36
hexadecane(1)+eicosane(2)	WW2002ROL1 = Rolo et al. (2002)	343.15	5	JOAC1	1	{0.033}	0.25	0.35
hexadecane(1)+eicosane(2)	WW2002ROL1 = Rolo et al. (2002)	343.15	5	BCRG	1	{0.343}	0.31	0.5
hexadecane(1)+eicosane(2)	WW2002ROL1 = Rolo et al. (2002)	343.15	5	CW	2	{-8.997, 2.207}	0.12	0.41
hexadecane(1)+eicosane(2)	WW2002ROL1 = Rolo et al. (2002)	343.15	5	RK2	2	{0.805, 0.884}	0.13	0.24
hexadecane(1)+eicosane(2)	WW2002ROL1 = Rolo et al. (2002)	343.15	5	JOAC2	2	{0.035, -0.035}	0.13	0.24
hexadecane(1)+eicosane(2)	WW2002ROL1 = Rolo et al. (2002)	343.15	5	FLW	2	{0.36, 2.475}	0.12	0.22
hexadecane(1)+eicosane(2)	WW2002ROL1 = Rolo et al. (2002)	343.15	5	QYDH	2	{0.951, 1.519}	0.13	0.41
hexadecane(1)+eicosane(2)	WW2002ROL1 = Rolo et al. (2002)	343.15	5	SIGMO	2	{0.057, 1.892}	0.12	0.39
hexadecane(1)+eicosane(2)	WW2002ROL1 = Rolo et al. (2002)	343.15	5	RK3	3	{0.599, 0.85, 0.515}	0.1	0.45
hexadecane(1)+eicosane(2)	WW2002ROL1 = Rolo et al. (2002)	343.15	5	JOAC3	3	{0.027, -0.034, 0.02}	0.1	0.44
hexadecane(1)+eicosane(2)	WW2002ROL1 = Rolo et al. (2002)	343.15	5	SFF	3	{-2.382, 2.397, 0.262}	0.11	0.44
hexane(1)+decane(2)	WW70P1 = Pugachevich and Belyarov (1970)	303.15	5	EBE	1	{0.771}	0.2	0.49
hexane(1)+decane(2)	WW70P1 = Pugachevich and Belyarov (1970)	303.15	5	WSD	1	{1.044}	0.14	0.4
hexane(1)+decane(2)	WW70P1 = Pugachevich and Belyarov (1970)	303.15	5	JOAC1	1	{0.098}	0.07	0.15
hexane(1)+decane(2)	WW70P1 = Pugachevich and Belyarov (1970)	303.15	5	BCRG	1	{0.591}	0.22	0.53
hexane(1)+decane(2)	WW70P1 = Pugachevich and Belyarov (1970)	303.15	5	CW	2	{-0.728, 0.32}	0.06	0.12
hexane(1)+decane(2)	WW70P1 = Pugachevich and Belyarov (1970)	303.15	5	RK2	2	{1.289, 0.321}	0.05	0.14
hexane(1)+decane(2)	WW70P1 = Pugachevich and Belyarov (1970)	303.15	5	JOAC2	2	{0.099, -0.004}	0.05	0.13
hexane(1)+decane(2)	WW70P1 = Pugachevich and Belyarov (1970)	303.15	5	FLW	2	{2.171, 0.516}	0.17	0.45
hexane(1)+decane(2)	WW70P1 = Pugachevich and Belyarov (1970)	303.15	5	QYDH	2	{0.843, 1.089}	0.07	0.12
hexane(1)+decane(2)	WW70P1 = Pugachevich and Belyarov (1970)	303.15	5	SIGMO	2	{4.948, 1.168}	0.09	0.18
hexane(1)+decane(2)	WW70P1 = Pugachevich and Belyarov (1970)	303.15	5	RK3	3	{1.357, 0.249, -0.254}	0.04	0.19
hexane(1)+decane(2)	WW70P1 = Pugachevich and Belyarov (1970)	303.15	5	JOAC3	3	{0.103, -0.001, -0.012}	0.04	0.19
hexane(1)+decane(2)	WW70P1 = Pugachevich and Belyarov (1970)	303.15	5	SFF	3	{-0.267, 0.121, 2.977}	0.04	0.18
hexane(1)+decane(2)	WW70P1 = Pugachevich and Belyarov (1970)	313.15	5	EBE	1	{0.729}	0.1	0.24
hexane(1)+decane(2)	WW70P1 = Pugachevich and Belyarov (1970)	313.15	5	WSD	1	{1.056}	0.08	0.13
hexane(1)+decane(2)	WW70P1 = Pugachevich and Belyarov (1970)	313.15	5	JOAC1	1	{0.134}	0.16	0.27
hexane(1)+decane(2)	WW70P1 = Pugachevich and Belyarov (1970)	313.15	5	BCRG	1	{0.521}	0.13	0.35
hexane(1)+decane(2)	WW70P1 = Pugachevich and Belyarov (1970)	313.15	5	CW	2	{0.14, 0.299}	0.07	0.21
hexane(1)+decane(2)	WW70P1 = Pugachevich and Belyarov (1970)	313.15	5	RK2	2	{1.798, -0.135}	0.07	0.22
hexane(1)+decane(2)	WW70P1 = Pugachevich and Belyarov (1970)	313.15	5	JOAC2	2	{0.136, 0.023}	0.07	0.2
hexane(1)+decane(2)	WW70P1 = Pugachevich and Belyarov (1970)	313.15	5	FLW	2	{0.991, 0.914}	0.16	0.34
hexane(1)+decane(2)	WW70P1 = Pugachevich and Belyarov (1970)	313.15	5	QYDH	2	{0.739, 1.024}	0.07	0.2
hexane(1)+decane(2)	WW70P1 = Pugachevich and Belyarov (1970)	313.15	5	SIGMO	2	{6.899, 1.246}	0.26	0.44
hexane(1)+decane(2)	WW70P1 = Pugachevich and Belyarov (1970)	313.15	5	RK3	3	{1.82, -0.137, -0.049}	0.07	0.23
hexane(1)+decane(2)	WW70P1 = Pugachevich and Belyarov (1970)	313.15	5	JOAC3	3	{0.136, 0.025, 0.002}	0.07	0.22
hexane(1)+decane(2)	WW70P1 = Pugachevich and Belyarov (1970)	313.15	5	SFF	3	{-0.301, -0.047, 1.235}	0.07	0.21
hexane(1)+decane(2)	WW70P1 = Pugachevich and Belyarov (1970)	323.15	5	EBE	1	{0.738}	0.19	0.46
hexane(1)+decane(2)	WW70P1 = Pugachevich and Belyarov (1970)	323.15	5	WSD	1	{1.055}	0.11	0.21
hexane(1)+decane(2)	WW70P1 = Pugachevich and Belyarov (1970)	323.15	5	JOAC1	1	{0.129}	0.09	0.2
hexane(1)+decane(2)	WW70P1 = Pugachevich and Belyarov (1970)	323.15	5	BCRG	1	{0.535}	0.23	0.56
hexane(1)+decane(2)	WW70P1 = Pugachevich and Belyarov (1970)	323.15	5	CW	2	{-0.221, 0.317}	0.07	0.15
hexane(1)+decane(2)	WW70P1 = Pugachevich and Belyarov (1970)	323.15	5	RK2	2	{1.596, 0.161}	0.07	0.15
hexane(1)+decane(2)	WW70P1 = Pugachevich and Belyarov (1970)	323.15	5	JOAC2	2	{0.134, 0.009}	0.07	0.14
hexane(1)+decane(2)	WW70P1 = Pugachevich and Belyarov (1970)	323.15	5	FLW	2	{1.866, 0.576}	0.11	0.21
hexane(1)+decane(2)	WW70P1 = Pugachevich and Belyarov (1970)	323.15	5	QYDH	2	{0.787, 1.059}	0.08	0.19
hexane(1)+decane(2)	WW70P1 = Pugachevich and Belyarov (1970)	323.15	5	SIGMO	2	{7.89, 1.219}	0.18	0.31
hexane(1)+decane(2)	WW70P1 = Pugachevich and Belyarov (1970)	323.15	5	RK3	3	{1.683, 0.282, -0.401}	0.04	0.16
hexane(1)+decane(2)	WW70P1 = Pugachevich and Belyarov (1970)	323.15	5	JOAC3	3	{0.138, 0.002, -0.02}	0.05	0.17
hexane(1)+decane(2)	WW70P1 = Pugachevich and Belyarov (1970)	323.15	5	SFF	3	{-0.312, 0.057, 1.238}	0.07	0.14
hexane(1)+decane(2)	WW70P1 = Pugachevich and Belyarov (1970)	333.15	5	EBE	1	{0.666}	0.07	0.12
hexane(1)+decane(2)	WW70P1 = Pugachevich and Belyarov (1970)	333.15	5	WSD	1	{1.085}	0.2	0.36
hexane(1)+decane(2)	WW70P1 = Pugachevich and Belyarov (1970)	333.15	5	JOAC1	1	{0.192}	0.41	0.64
hexane(1)+decane(2)	WW70P1 = Pugachevich and Belyarov (1970)	333.15	5	BCRG	1	{0.456}	0.1	0.27
hexane(1)+decane(2)	WW70P1 = Pugachevich and Belyarov (1970)	333.15	5	CW	2	{0.306, 0.345}	0.07	0.18
hexane(1)+decane(2)	WW70P1 = Pugachevich and Belyarov (1970)	333.15	5	RK2	2	{2.428, -0.442}	0.07	0.19
hexane(1)+decane(2)	WW70P1 = Pugachevich and Belyarov (1970)	333.15	5	JOAC2	2	{0.197, 0.048}	0.08	0.22
hexane(1)+decane(2)	WW70P1 = Pugachevich and Belyarov (1970)	333.15	5	FLW	2	{1.522, 0.647}	0.17	0.33
hexane(1)+decane(2)	WW70P1 = Pugachevich and Belyarov (1970)	333.15	5	QYDH	2	{0.667, 1.008}	0.07	0.16
hexane(1)+decane(2)	WW70P1 = Pugachevich and Belyarov (1970)	333.15	5	SIGMO	2	{7.014, 1.318}	0.5	0.68
hexane(1)+decane(2)	WW70P1 = Pugachevich and Belyarov (1970)	333.15	5	RK3	3	{2.436, -0.443, -0.019}	0.07	0.2
hexane(1)+decane(2)	WW70P1 = Pugachevich and Belyarov (1970)	333.15	5	JOAC3	3	{0.197, 0.056, 0.012}	0.07	0.19
hexane(1)+decane(2)	WW70P1 = Pugachevich and Belyarov (1970)	333.15	5	SFF	3	{-0.338, -0.15, 1.001}	0.07	0.19
hexane(1)+decane(2)	WW70P1 = Pugachevich and Belyarov (1970)	343.15	5	EBE	1	{0.573}	0.1	0.21
hexane(1)+decane(2)	WW70P1 = Pugachevich and Belyarov (1970)	343.15	5	WSD	1	{1.117}	0.49	0.93
hexane(1)+decane(2)	WW70P1 = Pugachevich and Belyarov (1970)	343.15	5	JOAC1	1	{0.258}	0.82	1.48
hexane(1)+decane(2)	WW70P1 = Pugachevich and Belyarov (1970)	343.15	5	BCRG	1	{0.335}	0.04	0.1
hexane(1)+decane(2)	WW70P1 = Pugachevich and Belyarov (1970)	343.15	5	CW	2	{0.492, 0.396}	0.03	0.08
hexane(1)+decane(2)	WW70P1 = Pugachevich and Belyarov (1970)	343.15	5	RK2	2	{3.308, -1.145}	0.06	0.16
hexane(1)+decane(2)	WW70P1 = Pugachevich and Belyarov (1970)	343.15	5	JOAC2	2	{0.277, 0.116}	0.12	0.24
hexane(1)+decane(2)	WW70P1 = Pugachevich and Belyarov (1970)	343.15	5	FLW	2	{1.795, 0.549}	0.25	0.63
hexane(1)+decane(2)	WW70P1 = Pugachevich and Belyarov (1970)	343.15	5	QYDH	2	{0.565, 0.957}	0.04	0.15
hexane(1)+decane(2)	WW70P1 = Pugachevich and Belyarov (1970)	343.15	5	SIGMO	2	{5.667, 1.411}	0.85	1.36
hexane(1)+decane(2)	WW70P1 = Pugachevich and Belyarov (1970)	343.15	5	RK3	3	{3.237, -1.027, 0.496}	0.02	0.07
hexane(1)+decane(2)	WW70P1 = Pugachevich and Belyarov (1970)	343.15	5	JOAC3	3	{0.268, 0.112, 0.054}	0.02	0.05
hexane(1)+decane(2)	WW70P1 = Pugachevich and Belyarov (1970)	343.15	5	SFF	3	{-0.417, -0.344, 1.657}	0.02	0.06
hexane(1)+decane(2)	WW70P1 = Pugachevich and Belyarov (1970)	353.15	5	EBE	1	{0.523}	0.03	0.11
hexane(1)+decane(2)	WW70P1 = Pugachevich and Belyarov (1970)	353.15	5	WSD	1	{1.149}	0.64	1.26
hexane(1)+decane(2)	WW70P1 = Pugachevich and Belyarov (1970)	353.15	5	JOAC1	1	{0.324}	1.08	2.02
hexane(1)+decane(2)	WW70P1 = Pugachevich and Belyarov (1970)	353.15	5	BCRG	1	{0.28}	0.17	0.29
hexane(1)+decane(2)	WW70P1 = Pugachevich and Belyarov (1970)	353.15	5	CW	2	{0.49, 0.469}	0.02	0.06
hexane(1)+decane(2)	WW70P1 = Pugachevich and Belyarov (1970)	353.15	5	RK2	2	{4.061, -1.292}	0.08	0.21
hexane(1)+decane(2)	WW70P1 = Pugachevich and Belyarov (1970)	353.15	5	JOAC2	2	{0.353, 0.148}	0.16	0.36
hexane(1)+decane(2)	WW70P1 = Pugachevich and Belyarov (1970)	353.15	5	FLW	2	{1.97, 0.5}	0.2	0.57
hexane(1)+decane(2)	WW70P1 = Pugachevich and Belyarov (1970)	353.15	5	QYDH	2	{0.522, 0.992}	0.03	0.07
hexane(1)+decane(2)	WW70P1 = Pugachevich and Belyarov (1970)	353.15	5	SIGMO	2	{5.295, 1.498}	1.01	1.72
hexane(1)+decane(2)	WW70P1 = Pugachevich and Belyarov (1970)	353.15	5	RK3	3	{3.918, -1.342, 0.522}	0.02	0.09
hexane(1)+decane(2)	WW70P1 = Pugachevich and Belyarov (1970)	353.15	5	JOAC3	3	{0.338, 0.154, 0.07}	0.03	0.11
hexane(1)+decane(2)	WW70P1 = Pugachevich and Belyarov (1970)	353.15	5	SFF	3	{-0.494, -0.412, 1.745}	0.02	0.09
hexane(1)+heptane(2)	WW70P1 = Pugachevich and Belyarov (1970)	303.15	7	EBE	1	{1.018}	0.07	0.16
hexane(1)+heptane(2)	WW70P1 = Pugachevich and Belyarov (1970)	303.15	7	WSD	1	{1.0}	0.07	0.14
hexane(1)+heptane(2)	WW70P1 = Pugachevich and Belyarov (1970)	303.15	7	JOAC1	1	{0.003}	0.07	0.15
hexane(1)+heptane(2)	WW70P1 = Pugachevich and Belyarov (1970)	303.15	7	BCRG	1	{1.036}	0.07	0.16
hexane(1)+heptane(2)	WW70P1 = Pugachevich and Belyarov (1970)	303.15	7	CW	2	{0.943, -0.008}	0.07	0.14
hexane(1)+heptane(2)	WW70P1 = Pugachevich and Belyarov (1970)	303.15	7	RK2	2	{-0.014, 0.111}	0.06	0.14
hexane(1)+heptane(2)	WW70P1 = Pugachevich and Belyarov (1970)	303.15	7	JOAC2	2	{0.004, -0.006}	0.06	0.14
hexane(1)+heptane(2)	WW70P1 = Pugachevich and Belyarov (1970)	303.15	7	FLW	2	{0.435, 2.085}	0.15	0.37
hexane(1)+heptane(2)	WW70P1 = Pugachevich and Belyarov (1970)	303.15	7	QYDH	2	{1.048, 1.052}	0.07	0.16
hexane(1)+heptane(2)	WW70P1 = Pugachevich and Belyarov (1970)	303.15	7	SIGMO	2	{0.828, 1.081}	0.07	0.17
hexane(1)+heptane(2)	WW70P1 = Pugachevich and Belyarov (1970)	303.15	7	RK3	3	{-0.011, 0.104, -0.177}	0.05	0.15
hexane(1)+heptane(2)	WW70P1 = Pugachevich and Belyarov (1970)	303.15	7	JOAC3	3	{0.004, -0.006, -0.01}	0.05	0.16
hexane(1)+heptane(2)	WW70P1 = Pugachevich and Belyarov (1970)	303.15	7	SFF	3	{-0.025, 0.176, 2.409}	0.05	0.15
hexane(1)+octane(2)	WW70P1 = Pugachevich and Belyarov (1970)	313.15	5	EBE	1	{1.012}	0.02	0.08
hexane(1)+octane(2)	WW70P1 = Pugachevich and Belyarov (1970)	313.15	5	WSD	1	{1.003}	0.03	0.06
hexane(1)+octane(2)	WW70P1 = Pugachevich and Belyarov (1970)	313.15	5	JOAC1	1	{0.016}	0.03	0.09
hexane(1)+octane(2)	WW70P1 = Pugachevich and Belyarov (1970)	313.15	5	BCRG	1	{1.024}	0.02	0.08
hexane(1)+octane(2)	WW70P1 = Pugachevich and Belyarov (1970)	313.15	5	CW	2	{-0.133, -0.014}	0.02	0.07
hexane(1)+octane(2)	WW70P1 = Pugachevich and Belyarov (1970)	313.15	5	RK2	2	{-0.041, -0.003}	0.02	0.08
hexane(1)+octane(2)	WW70P1 = Pugachevich and Belyarov (1970)	313.15	5	JOAC2	2	{0.016, 0.001}	0.02	0.08
hexane(1)+octane(2)	WW70P1 = Pugachevich and Belyarov (1970)	313.15	5	FLW	2	{0.99, 0.989}	0.19	0.56
hexane(1)+octane(2)	WW70P1 = Pugachevich and Belyarov (1970)	313.15	5	QYDH	2	{1.012, 0.999}	0.02	0.07
hexane(1)+octane(2)	WW70P1 = Pugachevich and Belyarov (1970)	313.15	5	SIGMO	2	{1.965, 0.999}	0.02	0.08
hexane(1)+octane(2)	WW70P1 = Pugachevich and Belyarov (1970)	313.15	5	RK3	3	{-0.02, 0.01, -0.061}	0.02	0.09
hexane(1)+octane(2)	WW70P1 = Pugachevich and Belyarov (1970)	313.15	5	JOAC3	3	{0.017, 0., -0.003}	0.02	0.1
hexane(1)+octane(2)	WW70P1 = Pugachevich and Belyarov (1970)	313.15	5	SFF	3	{0.013, -0.002, 1.028}	0.02	0.08
methane(1)+ethane(2)	WW2013BAI4 = Baidakov et al. (2013)	133.15	4	EBE	1	{1.681}	0.61	0.94
methane(1)+ethane(2)	WW2013BAI4 = Baidakov et al. (2013)	133.15	4	WSD	1	{0.854}	0.8	2.86
methane(1)+ethane(2)	WW2013BAI4 = Baidakov et al. (2013)	133.15	4	JOAC1	1	{0.002}	0.6	1.52
methane(1)+ethane(2)	WW2013BAI4 = Baidakov et al. (2013)	133.15	4	BCRG	1	{2.849}	0.64	1.27
methane(1)+ethane(2)	WW2013BAI4 = Baidakov et al. (2013)	133.15	4	CW	2	{-0.626, -0.669}	0.61	1.05
methane(1)+ethane(2)	WW2013BAI4 = Baidakov et al. (2013)	133.15	4	RK2	2	{-8.314, -2.769}	0.44	0.93
methane(1)+ethane(2)	WW2013BAI4 = Baidakov et al. (2013)	133.15	4	JOAC2	2	{-0.008, -0.058}	0.59	2.21
methane(1)+ethane(2)	WW2013BAI4 = Baidakov et al. (2013)	133.15	4	FLW	2	{0.894, 1.451}	0.85	1.81
methane(1)+ethane(2)	WW2013BAI4 = Baidakov et al. (2013)	133.15	4	QYDH	2	{1.793, 1.073}	0.46	1.7
methane(1)+ethane(2)	WW2013BAI4 = Baidakov et al. (2013)	133.15	4	SIGMO	2	{0.019, 1.103}	0.45	1.57
methane(1)+ethane(2)	WW2013BAI4 = Baidakov et al. (2013)	133.15	4	RK3	3	{-8.739, -1.7, 2.694}	0.06	0.24
methane(1)+ethane(2)	WW2013BAI4 = Baidakov et al. (2013)	133.15	4	JOAC3	3	{-0.014, 0.048, 0.218}	0.11	0.43
methane(1)+ethane(2)	WW2013BAI4 = Baidakov et al. (2013)	133.15	4	SFF	3	{1.061, -0.682, 0.288}	0.66	1.32
methane(1)+ethane(2)	WW2013BAI4 = Baidakov et al. (2013)	173.15	13	EBE	1	{1.438}	1.49	2.83
methane(1)+ethane(2)	WW2013BAI4 = Baidakov et al. (2013)	173.15	13	WSD	1	{1.204}	1.96	4.21
methane(1)+ethane(2)	WW2013BAI4 = Baidakov et al. (2013)	173.15	13	JOAC1	1	{1.482}	6.41	13.07
methane(1)+ethane(2)	WW2013BAI4 = Baidakov et al. (2013)	173.15	13	BCRG	1	{2.111}	1.43	2.71
methane(1)+ethane(2)	WW2013BAI4 = Baidakov et al. (2013)	173.15	13	CW	2	{-1.048, -0.587}	1.39	2.94
methane(1)+ethane(2)	WW2013BAI4 = Baidakov et al. (2013)	173.15	13	RK2	2	{-6.243, -2.406}	1.22	2.67
methane(1)+ethane(2)	WW2013BAI4 = Baidakov et al. (2013)	173.15	13	JOAC2	2	{1.425, 1.001}	2.63	5.49
methane(1)+ethane(2)	WW2013BAI4 = Baidakov et al. (2013)	173.15	13	FLW	2	{0.867, 1.394}	1.91	4.04
methane(1)+ethane(2)	WW2013BAI4 = Baidakov et al. (2013)	173.15	13	QYDH	2	{1.425, 0.984}	1.46	2.86
methane(1)+ethane(2)	WW2013BAI4 = Baidakov et al. (2013)	173.15	13	SIGMO	2	{0.393, 0.985}	1.48	2.83
methane(1)+ethane(2)	WW2013BAI4 = Baidakov et al. (2013)	173.15	13	RK3	3	{-6.726, -0.915, 4.07}	0.64	2.66
methane(1)+ethane(2)	WW2013BAI4 = Baidakov et al. (2013)	173.15	13	JOAC3	3	{1.363, 0.937, 0.937}	0.8	1.78
methane(1)+ethane(2)	WW2013BAI4 = Baidakov et al. (2013)	173.15	13	SFF	3	{0.412, -0.369, 5.088}	0.83	2.12
pentane(1)+heptane(2)	Mohsen-Nia et al. (2010)	293.15	8	EBE	1	{0.753}	0.15	0.32
pentane(1)+heptane(2)	Mohsen-Nia et al. (2010)	293.15	8	WSD	1	{1.039}	0.13	0.43
pentane(1)+heptane(2)	Mohsen-Nia et al. (2010)	293.15	8	JOAC1	1	{0.093}	0.1	0.49
pentane(1)+heptane(2)	Mohsen-Nia et al. (2010)	293.15	8	BCRG	1	{0.567}	0.16	0.29
pentane(1)+heptane(2)	Mohsen-Nia et al. (2010)	293.15	8	CW	2	{-0.445, 0.354}	0.09	0.49
pentane(1)+heptane(2)	Mohsen-Nia et al. (2010)	293.15	8	RK2	2	{1.211, 0.237}	0.09	0.51
pentane(1)+heptane(2)	Mohsen-Nia et al. (2010)	293.15	8	JOAC2	2	{0.094, -0.003}	0.09	0.5
pentane(1)+heptane(2)	Mohsen-Nia et al. (2010)	293.15	8	FLW	2	{1.282, 0.766}	0.25	0.75
pentane(1)+heptane(2)	Mohsen-Nia et al. (2010)	293.15	8	QYDH	2	{0.794, 1.08}	0.09	0.46
pentane(1)+heptane(2)	Mohsen-Nia et al. (2010)	293.15	8	SIGMO	2	{6.417, 1.223}	0.14	0.54
pentane(1)+heptane(2)	Mohsen-Nia et al. (2010)	293.15	8	RK3	3	{1.209, 0.219, 0.047}	0.09	0.48
pentane(1)+heptane(2)	Mohsen-Nia et al. (2010)	293.15	8	JOAC3	3	{0.094, -0.002, 0.003}	0.1	0.48
pentane(1)+heptane(2)	Mohsen-Nia et al. (2010)	293.15	8	SFF	3	{-0.338, 0.113, 1.229}	0.09	0.52
pentane(1)+heptane(2)	Mohsen-Nia et al. (2010)	323.15	8	EBE	1	{0.962}	0.2	0.49
pentane(1)+heptane(2)	Mohsen-Nia et al. (2010)	323.15	8	WSD	1	{1.023}	0.2	0.47
pentane(1)+heptane(2)	Mohsen-Nia et al. (2010)	323.15	8	JOAC1	1	{0.079}	0.22	0.53
pentane(1)+heptane(2)	Mohsen-Nia et al. (2010)	323.15	8	BCRG	1	{0.926}	0.2	0.49
pentane(1)+heptane(2)	Mohsen-Nia et al. (2010)	323.15	8	CW	2	{0.352, 0.029}	0.2	0.45
pentane(1)+heptane(2)	Mohsen-Nia et al. (2010)	323.15	8	RK2	2	{0.097, -0.234}	0.2	0.51
pentane(1)+heptane(2)	Mohsen-Nia et al. (2010)	323.15	8	JOAC2	2	{0.072, 0.025}	0.2	0.5
pentane(1)+heptane(2)	Mohsen-Nia et al. (2010)	323.15	8	FLW	2	{1.051, 0.93}	0.34	1
pentane(1)+heptane(2)	Mohsen-Nia et al. (2010)	323.15	8	QYDH	2	{0.965, 1.01}	0.2	0.53
pentane(1)+heptane(2)	Mohsen-Nia et al. (2010)	323.15	8	SIGMO	2	{8.531, 1.025}	0.21	0.51
pentane(1)+heptane(2)	Mohsen-Nia et al. (2010)	323.15	8	RK3	3	{0.188, -0.27, -0.519}	0.19	0.42
pentane(1)+heptane(2)	Mohsen-Nia et al. (2010)	323.15	8	JOAC3	3	{0.079, 0.028, -0.037}	0.19	0.46
pentane(1)+heptane(2)	Mohsen-Nia et al. (2010)	323.15	8	SFF	3	{0.025, -0.089, 1.03}	0.2	0.51
pentane(1)+hexadecane(2)	WW2011MOH3 – Mohsen-Nia (2011)	293.15	7	EBE	1	{0.757}	0.22	0.46
pentane(1)+hexadecane(2)	WW2011MOH3 – Mohsen-Nia (2011)	293.15	7	WSD	1	{1.117}	0.17	0.3
pentane(1)+hexadecane(2)	WW2011MOH3 – Mohsen-Nia (2011)	293.15	7	JOAC1	1	{0.304}	0.38	0.88
pentane(1)+hexadecane(2)	WW2011MOH3 – Mohsen-Nia (2011)	293.15	7	BCRG	1	{0.568}	0.25	0.57
pentane(1)+hexadecane(2)	WW2011MOH3 – Mohsen-Nia (2011)	293.15	7	CW	2	{-0.147, 0.309}	0.16	0.35
pentane(1)+hexadecane(2)	WW2011MOH3 – Mohsen-Nia (2011)	293.15	7	RK2	2	{3.279, 0.603}	0.16	0.45
pentane(1)+hexadecane(2)	WW2011MOH3 – Mohsen-Nia (2011)	293.15	7	JOAC2	2	{0.298, 0.07}	0.12	0.25
pentane(1)+hexadecane(2)	WW2011MOH3 – Mohsen-Nia (2011)	293.15	7	FLW	2	{0.846, 0.968}	0.05	0.13
pentane(1)+hexadecane(2)	WW2011MOH3 – Mohsen-Nia (2011)	293.15	7	QYDH	2	{0.766, 1.021}	0.19	0.39
pentane(1)+hexadecane(2)	WW2011MOH3 – Mohsen-Nia (2011)	293.15	7	SIGMO	2	{6.383, 1.226}	0.3	0.94
pentane(1)+hexadecane(2)	WW2011MOH3 – Mohsen-Nia (2011)	293.15	7	RK3	3	{3.392, 0.118, -1.493}	0.05	0.2
pentane(1)+hexadecane(2)	WW2011MOH3 – Mohsen-Nia (2011)	293.15	7	JOAC3	3	{0.303, 0.056, -0.055}	0.04	0.18
pentane(1)+hexadecane(2)	WW2011MOH3 – Mohsen-Nia (2011)	293.15	7	SFF	3	{-0.295, 0.088, 3.66}	0.11	0.31
pentane(1)+hexadecane(2)	WW2011MOH3 – Mohsen-Nia (2011)	298.15	7	EBE	1	{0.771}	0.24	0.55
pentane(1)+hexadecane(2)	WW2011MOH3 – Mohsen-Nia (2011)	298.15	7	WSD	1	{1.118}	0.19	0.39
pentane(1)+hexadecane(2)	WW2011MOH3 – Mohsen-Nia (2011)	298.15	7	JOAC1	1	{0.315}	0.39	0.96
pentane(1)+hexadecane(2)	WW2011MOH3 – Mohsen-Nia (2011)	298.15	7	BCRG	1	{0.596}	0.27	0.6
pentane(1)+hexadecane(2)	WW2011MOH3 – Mohsen-Nia (2011)	298.15	7	CW	2	{-0.215, 0.3}	0.19	0.42
pentane(1)+hexadecane(2)	WW2011MOH3 – Mohsen-Nia (2011)	298.15	7	RK2	2	{3.148, 0.633}	0.18	0.5
pentane(1)+hexadecane(2)	WW2011MOH3 – Mohsen-Nia (2011)	298.15	7	JOAC2	2	{0.308, 0.073}	0.14	0.28
pentane(1)+hexadecane(2)	WW2011MOH3 – Mohsen-Nia (2011)	298.15	7	FLW	2	{0.834, 0.977}	0.04	0.09
pentane(1)+hexadecane(2)	WW2011MOH3 – Mohsen-Nia (2011)	298.15	7	QYDH	2	{0.779, 1.02}	0.21	0.48
pentane(1)+hexadecane(2)	WW2011MOH3 – Mohsen-Nia (2011)	298.15	7	SIGMO	2	{5.62, 1.198}	0.31	0.83
pentane(1)+hexadecane(2)	WW2011MOH3 – Mohsen-Nia (2011)	298.15	7	RK3	3	{3.264, 0.202, -1.801}	0.05	0.24
pentane(1)+hexadecane(2)	WW2011MOH3 – Mohsen-Nia (2011)	298.15	7	JOAC3	3	{0.313, 0.058, -0.063}	0.04	0.15
pentane(1)+hexadecane(2)	WW2011MOH3 – Mohsen-Nia (2011)	298.15	7	SFF	3	{-0.279, 0.119, 4.232}	0.11	0.36
pentane(1)+hexadecane(2)	WW2011MOH3 – Mohsen-Nia (2011)	305.15	7	EBE	1	{0.773}	0.27	0.62
pentane(1)+hexadecane(2)	WW2011MOH3 – Mohsen-Nia (2011)	305.15	7	WSD	1	{1.129}	0.2	0.46
pentane(1)+hexadecane(2)	WW2011MOH3 – Mohsen-Nia (2011)	305.15	7	JOAC1	1	{0.346}	0.43	1.04
pentane(1)+hexadecane(2)	WW2011MOH3 – Mohsen-Nia (2011)	305.15	7	BCRG	1	{0.596}	0.3	0.7
pentane(1)+hexadecane(2)	WW2011MOH3 – Mohsen-Nia (2011)	305.15	7	CW	2	{-0.238, 0.3}	0.2	0.43
pentane(1)+hexadecane(2)	WW2011MOH3 – Mohsen-Nia (2011)	305.15	7	RK2	2	{3.205, 0.726}	0.19	0.53
pentane(1)+hexadecane(2)	WW2011MOH3 – Mohsen-Nia (2011)	305.15	7	JOAC2	2	{0.339, 0.082}	0.15	0.28
pentane(1)+hexadecane(2)	WW2011MOH3 – Mohsen-Nia (2011)	305.15	7	FLW	2	{0.809, 0.984}	0.04	0.12
pentane(1)+hexadecane(2)	WW2011MOH3 – Mohsen-Nia (2011)	305.15	7	QYDH	2	{0.783, 1.023}	0.23	0.53
pentane(1)+hexadecane(2)	WW2011MOH3 – Mohsen-Nia (2011)	305.15	7	SIGMO	2	{7.519, 1.197}	0.32	0.85
pentane(1)+hexadecane(2)	WW2011MOH3 – Mohsen-Nia (2011)	305.15	7	RK3	3	{3.317, 0.264, -1.806}	0.05	0.24
pentane(1)+hexadecane(2)	WW2011MOH3 – Mohsen-Nia (2011)	305.15	7	JOAC3	3	{0.345, 0.065, -0.068}	0.04	0.17
pentane(1)+hexadecane(2)	WW2011MOH3 – Mohsen-Nia (2011)	305.15	7	SFF	3	{-0.279, 0.127, 4.038}	0.11	0.37
pentane(1)+hexadecane(2)	WW2011MOH3 – Mohsen-Nia (2011)	318.15	7	EBE	1	{0.784}	0.26	0.65
pentane(1)+hexadecane(2)	WW2011MOH3 – Mohsen-Nia (2011)	318.15	7	WSD	1	{1.151}	0.23	0.49
pentane(1)+hexadecane(2)	WW2011MOH3 – Mohsen-Nia (2011)	318.15	7	JOAC1	1	{0.41}	0.63	1.29
pentane(1)+hexadecane(2)	WW2011MOH3 – Mohsen-Nia (2011)	318.15	7	BCRG	1	{0.616}	0.28	0.71
pentane(1)+hexadecane(2)	WW2011MOH3 – Mohsen-Nia (2011)	318.15	7	CW	2	{-0.183, 0.275}	0.22	0.47
pentane(1)+hexadecane(2)	WW2011MOH3 – Mohsen-Nia (2011)	318.15	7	RK2	2	{3.148, 0.679}	0.21	0.57
pentane(1)+hexadecane(2)	WW2011MOH3 – Mohsen-Nia (2011)	318.15	7	JOAC2	2	{0.405, 0.114}	0.13	0.28
pentane(1)+hexadecane(2)	WW2011MOH3 – Mohsen-Nia (2011)	318.15	7	FLW	2	{0.831, 0.958}	0.06	0.17
pentane(1)+hexadecane(2)	WW2011MOH3 – Mohsen-Nia (2011)	318.15	7	QYDH	2	{0.788, 1.009}	0.24	0.61
pentane(1)+hexadecane(2)	WW2011MOH3 – Mohsen-Nia (2011)	318.15	7	SIGMO	2	{7.343, 1.182}	0.35	0.93
pentane(1)+hexadecane(2)	WW2011MOH3 – Mohsen-Nia (2011)	318.15	7	RK3	3	{3.26, 0.09, -1.67}	0.06	0.19
pentane(1)+hexadecane(2)	WW2011MOH3 – Mohsen-Nia (2011)	318.15	7	JOAC3	3	{0.41, 0.101, -0.054}	0.04	0.12
pentane(1)+hexadecane(2)	WW2011MOH3 – Mohsen-Nia (2011)	318.15	7	SFF	3	{-0.258, 0.114, 4.781}	0.13	0.41
pentane(1)+hexadecane(2)	WW2011MOH3 – Mohsen-Nia (2011)	323.15	7	EBE	1	{0.803}	0.28	0.83
pentane(1)+hexadecane(2)	WW2011MOH3 – Mohsen-Nia (2011)	323.15	7	WSD	1	{1.152}	0.27	0.68
pentane(1)+hexadecane(2)	WW2011MOH3 – Mohsen-Nia (2011)	323.15	7	JOAC1	1	{0.427}	0.65	1.39
pentane(1)+hexadecane(2)	WW2011MOH3 – Mohsen-Nia (2011)	323.15	7	BCRG	1	{0.646}	0.31	0.88
pentane(1)+hexadecane(2)	WW2011MOH3 – Mohsen-Nia (2011)	323.15	7	CW	2	{-0.219, 0.252}	0.26	0.57
pentane(1)+hexadecane(2)	WW2011MOH3 – Mohsen-Nia (2011)	323.15	7	RK2	2	{2.879, 0.687}	0.25	0.59
pentane(1)+hexadecane(2)	WW2011MOH3 – Mohsen-Nia (2011)	323.15	7	JOAC2	2	{0.419, 0.123}	0.17	0.43
pentane(1)+hexadecane(2)	WW2011MOH3 – Mohsen-Nia (2011)	323.15	7	FLW	2	{0.831, 0.965}	0.07	0.16
pentane(1)+hexadecane(2)	WW2011MOH3 – Mohsen-Nia (2011)	323.15	7	QYDH	2	{0.804, 1.001}	0.28	0.82
pentane(1)+hexadecane(2)	WW2011MOH3 – Mohsen-Nia (2011)	323.15	7	SIGMO	2	{9.842, 1.163}	0.38	0.92
pentane(1)+hexadecane(2)	WW2011MOH3 – Mohsen-Nia (2011)	323.15	7	RK3	3	{2.982, 0.085, -1.619}	0.05	0.11
pentane(1)+hexadecane(2)	WW2011MOH3 – Mohsen-Nia (2011)	323.15	7	JOAC3	3	{0.426, 0.103, -0.065}	0.03	0.09
pentane(1)+hexadecane(2)	WW2011MOH3 – Mohsen-Nia (2011)	323.15	7	SFF	3	{-0.233, 0.156, 5.353}	0.14	0.41

## Sheet: CASE 1B
MIXTURE	REFERENCES	T / K	N-data	model	Nº of coefficients	Coefficients Value	AAD (%)	PDm (%)
decane(1)+eicosane(2)	WW2005QUE1 = Queimada et al. (2005)	313.15	7	EBE	1	{0.589}	0.44	1.49
decane(1)+eicosane(2)	WW2005QUE1 = Queimada et al. (2005)	313.15	7	WSD	1	{1.065}	0.46	1.49
decane(1)+eicosane(2)	WW2005QUE1 = Queimada et al. (2005)	313.15	7	JOAC1	1	{0.14}	0.46	1.49
decane(1)+eicosane(2)	WW2005QUE1 = Queimada et al. (2005)	313.15	7	BCRG	1	{0.336}	0.44	1.49
decane(1)+eicosane(2)	WW2005QUE1 = Queimada et al. (2005)	313.15	7	CW	2	{0.411, 0.411}	0.44	1.49
decane(1)+eicosane(2)	WW2005QUE1 = Queimada et al. (2005)	313.15	7	RK2	2	{2.883, -0.709}	0.46	1.49
decane(1)+eicosane(2)	WW2005QUE1 = Queimada et al. (2005)	313.15	7	JOAC2	2	{0.14, -0.035}	0.47	1.49
decane(1)+eicosane(2)	WW2005QUE1 = Queimada et al. (2005)	313.15	7	FLW	2	{0.851, 1.023}	0.52	1.49
decane(1)+eicosane(2)	WW2005QUE1 = Queimada et al. (2005)	313.15	7	QYDH	2	{0.589, 1.}	0.44	1.49
decane(1)+eicosane(2)	WW2005QUE1 = Queimada et al. (2005)	313.15	7	SIGMO	2	{2.783, 1.432}	0.44	1.49
decane(1)+eicosane(2)	WW2005QUE1 = Queimada et al. (2005)	313.15	7	RK3	3	{2.577, 0.463, 3.826}	0.27	1.49
decane(1)+eicosane(2)	WW2005QUE1 = Queimada et al. (2005)	313.15	7	JOAC3	3	{0.127, 0.001, 0.156}	0.27	1.49
decane(1)+eicosane(2)	WW2005QUE1 = Queimada et al. (2005)	313.15	7	SFF	3	{-0.507, -0.519, 5.702}	0.4	1.49
decane(1)+eicosane(2)	WW2005QUE1 = Queimada et al. (2005)	323.15	7	EBE	1	{0.534}	0.57	1.62
decane(1)+eicosane(2)	WW2005QUE1 = Queimada et al. (2005)	323.15	7	WSD	1	{1.078}	0.39	1.62
decane(1)+eicosane(2)	WW2005QUE1 = Queimada et al. (2005)	323.15	7	JOAC1	1	{0.168}	0.34	1.62
decane(1)+eicosane(2)	WW2005QUE1 = Queimada et al. (2005)	323.15	7	BCRG	1	{0.334}	0.62	1.62
decane(1)+eicosane(2)	WW2005QUE1 = Queimada et al. (2005)	323.15	7	CW	2	{-0.774, 0.843}	0.31	1.62
decane(1)+eicosane(2)	WW2005QUE1 = Queimada et al. (2005)	323.15	7	RK2	2	{3.368, 0.702}	0.33	1.62
decane(1)+eicosane(2)	WW2005QUE1 = Queimada et al. (2005)	323.15	7	JOAC2	2	{0.166, -0.011}	0.33	1.62
decane(1)+eicosane(2)	WW2005QUE1 = Queimada et al. (2005)	323.15	7	FLW	2	{0.684, 1.18}	0.41	1.62
decane(1)+eicosane(2)	WW2005QUE1 = Queimada et al. (2005)	323.15	7	QYDH	2	{0.676, 1.34}	0.32	1.62
decane(1)+eicosane(2)	WW2005QUE1 = Queimada et al. (2005)	323.15	7	SIGMO	2	{2.972, 1.523}	0.31	1.62
decane(1)+eicosane(2)	WW2005QUE1 = Queimada et al. (2005)	323.15	7	RK3	3	{3.341, 0.672, 0.842}	0.28	1.62
decane(1)+eicosane(2)	WW2005QUE1 = Queimada et al. (2005)	323.15	7	JOAC3	3	{0.165, -0.008, 0.035}	0.28	1.62
decane(1)+eicosane(2)	WW2005QUE1 = Queimada et al. (2005)	323.15	7	SFF	3	{-0.792, 0.291, 0.665}	0.32	1.62
decane(1)+eicosane(2)	WW2005QUE1 = Queimada et al. (2005)	333.15	7	EBE	1	{0.585}	0.72	1.76
decane(1)+eicosane(2)	WW2005QUE1 = Queimada et al. (2005)	333.15	7	WSD	1	{1.083}	0.68	1.76
decane(1)+eicosane(2)	WW2005QUE1 = Queimada et al. (2005)	333.15	7	JOAC1	1	{0.177}	0.66	1.76
decane(1)+eicosane(2)	WW2005QUE1 = Queimada et al. (2005)	333.15	7	BCRG	1	{0.344}	0.74	1.76
decane(1)+eicosane(2)	WW2005QUE1 = Queimada et al. (2005)	333.15	7	CW	2	{-2.573, 1.391}	0.57	1.76
decane(1)+eicosane(2)	WW2005QUE1 = Queimada et al. (2005)	333.15	7	RK2	2	{3.281, 1.317}	0.62	1.76
decane(1)+eicosane(2)	WW2005QUE1 = Queimada et al. (2005)	333.15	7	JOAC2	2	{0.17, -0.037}	0.61	1.76
decane(1)+eicosane(2)	WW2005QUE1 = Queimada et al. (2005)	333.15	7	FLW	2	{0.64, 1.234}	0.71	1.76
decane(1)+eicosane(2)	WW2005QUE1 = Queimada et al. (2005)	333.15	7	QYDH	2	{0.742, 1.456}	0.62	1.76
decane(1)+eicosane(2)	WW2005QUE1 = Queimada et al. (2005)	333.15	7	SIGMO	2	{0.392, 1.696}	0.59	1.76
decane(1)+eicosane(2)	WW2005QUE1 = Queimada et al. (2005)	333.15	7	RK3	3	{3.148, 1.371, 3.053}	0.41	1.76
decane(1)+eicosane(2)	WW2005QUE1 = Queimada et al. (2005)	333.15	7	JOAC3	3	{0.164, -0.034, 0.128}	0.41	1.76
decane(1)+eicosane(2)	WW2005QUE1 = Queimada et al. (2005)	333.15	7	SFF	3	{-0.875, 0.506, 0.852}	0.61	1.76
decane(1)+eicosane(2)	WW2005QUE1 = Queimada et al. (2005)	343.15	7	EBE	1	{0.563}	0.91	1.92
decane(1)+eicosane(2)	WW2005QUE1 = Queimada et al. (2005)	343.15	7	WSD	1	{1.09}	0.84	1.92
decane(1)+eicosane(2)	WW2005QUE1 = Queimada et al. (2005)	343.15	7	JOAC1	1	{0.207}	0.8	1.92
decane(1)+eicosane(2)	WW2005QUE1 = Queimada et al. (2005)	343.15	7	BCRG	1	{0.338}	0.96	1.92
decane(1)+eicosane(2)	WW2005QUE1 = Queimada et al. (2005)	343.15	7	CW	2	{-3.523, 1.637}	0.63	1.92
decane(1)+eicosane(2)	WW2005QUE1 = Queimada et al. (2005)	343.15	7	RK2	2	{3.494, 2.986}	0.69	1.92
decane(1)+eicosane(2)	WW2005QUE1 = Queimada et al. (2005)	343.15	7	JOAC2	2	{0.186, -0.106}	0.68	1.92
decane(1)+eicosane(2)	WW2005QUE1 = Queimada et al. (2005)	343.15	7	FLW	2	{0.452, 1.563}	0.71	1.92
decane(1)+eicosane(2)	WW2005QUE1 = Queimada et al. (2005)	343.15	7	QYDH	2	{0.961, 1.922}	0.73	1.92
decane(1)+eicosane(2)	WW2005QUE1 = Queimada et al. (2005)	343.15	7	SIGMO	2	{-0.014, 2.34}	0.69	1.92
decane(1)+eicosane(2)	WW2005QUE1 = Queimada et al. (2005)	343.15	7	RK3	3	{3.082, 1.407, 3.791}	0.51	1.92
decane(1)+eicosane(2)	WW2005QUE1 = Queimada et al. (2005)	343.15	7	JOAC3	3	{0.169, -0.035, 0.165}	0.52	1.92
decane(1)+eicosane(2)	WW2005QUE1 = Queimada et al. (2005)	343.15	7	SFF	3	{-2.827, 2.536, 0.19}	0.65	1.92
pentane(1)+hexadecane(2)	WW2011MOH3 – Mohsen-Nia (2011)	293.15	9	EBE	1	{0.755}	0.27	0.76
pentane(1)+hexadecane(2)	WW2011MOH3 – Mohsen-Nia (2011)	293.15	9	WSD	1	{1.114}	0.21	0.54
pentane(1)+hexadecane(2)	WW2011MOH3 – Mohsen-Nia (2011)	293.15	9	JOAC1	1	{0.297}	0.27	0.77
pentane(1)+hexadecane(2)	WW2011MOH3 – Mohsen-Nia (2011)	293.15	9	BCRG	1	{0.559}	0.3	0.91
pentane(1)+hexadecane(2)	WW2011MOH3 – Mohsen-Nia (2011)	293.15	9	CW	2	{-0.202, 0.311}	0.2	0.45
pentane(1)+hexadecane(2)	WW2011MOH3 – Mohsen-Nia (2011)	293.15	9	RK2	2	{3.204, 0.812}	0.19	0.44
pentane(1)+hexadecane(2)	WW2011MOH3 – Mohsen-Nia (2011)	293.15	9	JOAC2	2	{0.292, 0.061}	0.17	0.39
pentane(1)+hexadecane(2)	WW2011MOH3 – Mohsen-Nia (2011)	293.15	9	FLW	2	{2.047, 0.586}	0.1	0.37
pentane(1)+hexadecane(2)	WW2011MOH3 – Mohsen-Nia (2011)	293.15	9	QYDH	2	{0.776, 1.035}	0.22	0.57
pentane(1)+hexadecane(2)	WW2011MOH3 – Mohsen-Nia (2011)	293.15	9	SIGMO	2	{7.641, 1.21}	0.27	0.72
pentane(1)+hexadecane(2)	WW2011MOH3 – Mohsen-Nia (2011)	293.15	9	RK3	3	{3.319, 0.289, -1.425}	0.07	0.37
pentane(1)+hexadecane(2)	WW2011MOH3 – Mohsen-Nia (2011)	293.15	9	JOAC3	3	{0.297, 0.047, -0.06}	0.07	0.37
pentane(1)+hexadecane(2)	WW2011MOH3 – Mohsen-Nia (2011)	293.15	9	SFF	3	{-0.294, 0.171, 4.562}	0.12	0.37
pentane(1)+hexadecane(2)	WW2011MOH3 – Mohsen-Nia (2011)	298.15	9	EBE	1	{0.774}	0.4	1.17
pentane(1)+hexadecane(2)	WW2011MOH3 – Mohsen-Nia (2011)	298.15	9	WSD	1	{1.11}	0.34	0.93
pentane(1)+hexadecane(2)	WW2011MOH3 – Mohsen-Nia (2011)	298.15	9	JOAC1	1	{0.289}	0.35	0.84
pentane(1)+hexadecane(2)	WW2011MOH3 – Mohsen-Nia (2011)	298.15	9	BCRG	1	{0.591}	0.43	1.28
pentane(1)+hexadecane(2)	WW2011MOH3 – Mohsen-Nia (2011)	298.15	9	CW	2	{-0.215, 0.278}	0.31	0.85
pentane(1)+hexadecane(2)	WW2011MOH3 – Mohsen-Nia (2011)	298.15	9	RK2	2	{2.939, 1.057}	0.3	0.84
pentane(1)+hexadecane(2)	WW2011MOH3 – Mohsen-Nia (2011)	298.15	9	JOAC2	2	{0.293, 0.054}	0.28	0.84
pentane(1)+hexadecane(2)	WW2011MOH3 – Mohsen-Nia (2011)	298.15	9	FLW	2	{2.188, 0.574}	0.14	0.84
pentane(1)+hexadecane(2)	WW2011MOH3 – Mohsen-Nia (2011)	298.15	9	QYDH	2	{0.803, 1.043}	0.33	0.92
pentane(1)+hexadecane(2)	WW2011MOH3 – Mohsen-Nia (2011)	298.15	9	SIGMO	2	{6.865, 1.193}	0.36	0.84
pentane(1)+hexadecane(2)	WW2011MOH3 – Mohsen-Nia (2011)	298.15	9	RK3	3	{3.121, 0.609, -2.322}	0.12	0.84
pentane(1)+hexadecane(2)	WW2011MOH3 – Mohsen-Nia (2011)	298.15	9	JOAC3	3	{0.301, 0.032, -0.108}	0.14	0.84
pentane(1)+hexadecane(2)	WW2011MOH3 – Mohsen-Nia (2011)	298.15	9	SFF	3	{-0.274, 0.285, 4.571}	0.17	0.84
pentane(1)+hexadecane(2)	WW2011MOH3 – Mohsen-Nia (2011)	305.15	9	EBE	1	{0.795}	0.68	2.12
pentane(1)+hexadecane(2)	WW2011MOH3 – Mohsen-Nia (2011)	305.15	9	WSD	1	{1.108}	0.63	2.12
pentane(1)+hexadecane(2)	WW2011MOH3 – Mohsen-Nia (2011)	305.15	9	JOAC1	1	{0.296}	0.54	2.12
pentane(1)+hexadecane(2)	WW2011MOH3 – Mohsen-Nia (2011)	305.15	9	BCRG	1	{0.625}	0.71	2.17
pentane(1)+hexadecane(2)	WW2011MOH3 – Mohsen-Nia (2011)	305.15	9	CW	2	{-0.457, 0.264}	0.57	2.12
pentane(1)+hexadecane(2)	WW2011MOH3 – Mohsen-Nia (2011)	305.15	9	RK2	2	{2.561, 1.603}	0.54	2.12
pentane(1)+hexadecane(2)	WW2011MOH3 – Mohsen-Nia (2011)	305.15	9	JOAC2	2	{0.296, 0.043}	0.54	2.12
pentane(1)+hexadecane(2)	WW2011MOH3 – Mohsen-Nia (2011)	305.15	9	FLW	2	{2.528, 0.546}	0.32	2.12
pentane(1)+hexadecane(2)	WW2011MOH3 – Mohsen-Nia (2011)	305.15	9	QYDH	2	{0.841, 1.059}	0.57	2.12
pentane(1)+hexadecane(2)	WW2011MOH3 – Mohsen-Nia (2011)	305.15	9	SIGMO	2	{5.702, 1.17}	0.6	2.12
pentane(1)+hexadecane(2)	WW2011MOH3 – Mohsen-Nia (2011)	305.15	9	RK3	3	{2.783, 1.066, -2.863}	0.3	2.12
pentane(1)+hexadecane(2)	WW2011MOH3 – Mohsen-Nia (2011)	305.15	9	JOAC3	3	{0.305, 0.016, -0.128}	0.34	2.12
pentane(1)+hexadecane(2)	WW2011MOH3 – Mohsen-Nia (2011)	305.15	9	SFF	3	{-0.241, 0.521, 5.347}	0.3	2.12
pentane(1)+hexadecane(2)	WW2011MOH3 – Mohsen-Nia (2011)	318.15	9	EBE	1	{0.848}	1.36	5.26
pentane(1)+hexadecane(2)	WW2011MOH3 – Mohsen-Nia (2011)	318.15	9	WSD	1	{1.107}	1.32	5.26
pentane(1)+hexadecane(2)	WW2011MOH3 – Mohsen-Nia (2011)	318.15	9	JOAC1	1	{0.301}	1.14	5.26
pentane(1)+hexadecane(2)	WW2011MOH3 – Mohsen-Nia (2011)	318.15	9	BCRG	1	{0.719}	1.38	5.26
pentane(1)+hexadecane(2)	WW2011MOH3 – Mohsen-Nia (2011)	318.15	9	CW	2	{-2.097, 0.289}	1.19	5.26
pentane(1)+hexadecane(2)	WW2011MOH3 – Mohsen-Nia (2011)	318.15	9	RK2	2	{1.72, 2.559}	1.11	5.26
pentane(1)+hexadecane(2)	WW2011MOH3 – Mohsen-Nia (2011)	318.15	9	JOAC2	2	{0.297, 0.02}	1.14	5.26
pentane(1)+hexadecane(2)	WW2011MOH3 – Mohsen-Nia (2011)	318.15	9	FLW	2	{3.024, 0.536}	0.8	5.26
pentane(1)+hexadecane(2)	WW2011MOH3 – Mohsen-Nia (2011)	318.15	9	QYDH	2	{0.92, 1.084}	1.19	5.26
pentane(1)+hexadecane(2)	WW2011MOH3 – Mohsen-Nia (2011)	318.15	9	SIGMO	2	{1.333, 1.129}	1.2	5.26
pentane(1)+hexadecane(2)	WW2011MOH3 – Mohsen-Nia (2011)	318.15	9	RK3	3	{2.015, 1.82, -3.692}	0.79	5.26
pentane(1)+hexadecane(2)	WW2011MOH3 – Mohsen-Nia (2011)	318.15	9	JOAC3	3	{0.309, -0.027, -0.193}	0.84	5.26
pentane(1)+hexadecane(2)	WW2011MOH3 – Mohsen-Nia (2011)	318.15	9	SFF	3	{-0.178, 0.967, 5.83}	0.63	5.26
pentane(1)+hexadecane(2)	WW2011MOH3 – Mohsen-Nia (2011)	323.15	9	EBE	1	{0.889}	1.63	6.52
pentane(1)+hexadecane(2)	WW2011MOH3 – Mohsen-Nia (2011)	323.15	9	WSD	1	{1.096}	1.62	6.52
pentane(1)+hexadecane(2)	WW2011MOH3 – Mohsen-Nia (2011)	323.15	9	JOAC1	1	{0.285}	1.42	6.52
pentane(1)+hexadecane(2)	WW2011MOH3 – Mohsen-Nia (2011)	323.15	9	BCRG	1	{0.788}	1.64	6.52
pentane(1)+hexadecane(2)	WW2011MOH3 – Mohsen-Nia (2011)	323.15	9	CW	2	{-7.412, 0.41}	1.5	6.52
pentane(1)+hexadecane(2)	WW2011MOH3 – Mohsen-Nia (2011)	323.15	9	RK2	2	{1.11, 2.823}	1.38	6.52
pentane(1)+hexadecane(2)	WW2011MOH3 – Mohsen-Nia (2011)	323.15	9	JOAC2	2	{0.282, 0.012}	1.42	6.52
pentane(1)+hexadecane(2)	WW2011MOH3 – Mohsen-Nia (2011)	323.15	9	FLW	2	{2.731, 0.58}	1.03	6.52
pentane(1)+hexadecane(2)	WW2011MOH3 – Mohsen-Nia (2011)	323.15	9	QYDH	2	{0.967, 1.081}	1.47	6.52
pentane(1)+hexadecane(2)	WW2011MOH3 – Mohsen-Nia (2011)	323.15	9	SIGMO	2	{0.972, 1.125}	1.48	6.52
pentane(1)+hexadecane(2)	WW2011MOH3 – Mohsen-Nia (2011)	323.15	9	RK3	3	{1.467, 1.972, -4.355}	0.99	6.52
pentane(1)+hexadecane(2)	WW2011MOH3 – Mohsen-Nia (2011)	323.15	9	JOAC3	3	{0.3, -0.043, -0.246}	1.06	6.52
pentane(1)+hexadecane(2)	WW2011MOH3 – Mohsen-Nia (2011)	323.15	9	SFF	3	{-0.128, 1.176, 6.187}	0.79	6.52
hexane(1)+decane(2)	WW70P1 = Pugachevich and Belyarov (1970)	303.15	7	EBE	1	{0.764}	0.16	0.59
hexane(1)+decane(2)	WW70P1 = Pugachevich and Belyarov (1970)	303.15	7	WSD	1	{1.045}	0.18	0.59
hexane(1)+decane(2)	WW70P1 = Pugachevich and Belyarov (1970)	303.15	7	JOAC1	1	{0.109}	0.21	0.59
hexane(1)+decane(2)	WW70P1 = Pugachevich and Belyarov (1970)	303.15	7	BCRG	1	{0.586}	0.17	0.59
hexane(1)+decane(2)	WW70P1 = Pugachevich and Belyarov (1970)	303.15	7	CW	2	{0.273, 0.231}	0.16	0.59
hexane(1)+decane(2)	WW70P1 = Pugachevich and Belyarov (1970)	303.15	7	RK2	2	{1.487, -0.259}	0.16	0.59
hexane(1)+decane(2)	WW70P1 = Pugachevich and Belyarov (1970)	303.15	7	JOAC2	2	{0.111, 0.028}	0.17	0.59
hexane(1)+decane(2)	WW70P1 = Pugachevich and Belyarov (1970)	303.15	7	FLW	2	{0.92, 0.984}	0.23	0.59
hexane(1)+decane(2)	WW70P1 = Pugachevich and Belyarov (1970)	303.15	7	QYDH	2	{0.759, 0.992}	0.16	0.59
hexane(1)+decane(2)	WW70P1 = Pugachevich and Belyarov (1970)	303.15	7	SIGMO	2	{8.794, 1.196}	0.28	0.59
hexane(1)+decane(2)	WW70P1 = Pugachevich and Belyarov (1970)	303.15	7	RK3	3	{1.491, -0.299, -0.068}	0.16	0.59
hexane(1)+decane(2)	WW70P1 = Pugachevich and Belyarov (1970)	303.15	7	JOAC3	3	{0.112, 0.028, 0.001}	0.17	0.59
hexane(1)+decane(2)	WW70P1 = Pugachevich and Belyarov (1970)	303.15	7	SFF	3	{-0.16, -0.144, 0.401}	0.16	0.59
hexane(1)+decane(2)	WW70P1 = Pugachevich and Belyarov (1970)	313.15	7	EBE	1	{0.717}	0.11	0.31
hexane(1)+decane(2)	WW70P1 = Pugachevich and Belyarov (1970)	313.15	7	WSD	1	{1.059}	0.14	0.31
hexane(1)+decane(2)	WW70P1 = Pugachevich and Belyarov (1970)	313.15	7	JOAC1	1	{0.138}	0.23	0.47
hexane(1)+decane(2)	WW70P1 = Pugachevich and Belyarov (1970)	313.15	7	BCRG	1	{0.511}	0.11	0.31
hexane(1)+decane(2)	WW70P1 = Pugachevich and Belyarov (1970)	313.15	7	CW	2	{0.331, 0.28}	0.11	0.31
hexane(1)+decane(2)	WW70P1 = Pugachevich and Belyarov (1970)	313.15	7	RK2	2	{1.895, -0.332}	0.11	0.31
hexane(1)+decane(2)	WW70P1 = Pugachevich and Belyarov (1970)	313.15	7	JOAC2	2	{0.141, 0.032}	0.11	0.31
hexane(1)+decane(2)	WW70P1 = Pugachevich and Belyarov (1970)	313.15	7	FLW	2	{1.196, 0.792}	0.18	0.42
hexane(1)+decane(2)	WW70P1 = Pugachevich and Belyarov (1970)	313.15	7	QYDH	2	{0.709, 0.993}	0.11	0.31
hexane(1)+decane(2)	WW70P1 = Pugachevich and Belyarov (1970)	313.15	7	SIGMO	2	{6.653, 1.251}	0.31	0.52
hexane(1)+decane(2)	WW70P1 = Pugachevich and Belyarov (1970)	313.15	7	RK3	3	{1.9, -0.384, 0.069}	0.11	0.31
hexane(1)+decane(2)	WW70P1 = Pugachevich and Belyarov (1970)	313.15	7	JOAC3	3	{0.142, 0.039, 0.01}	0.11	0.31
hexane(1)+decane(2)	WW70P1 = Pugachevich and Belyarov (1970)	313.15	7	SFF	3	{-0.286, -0.131, 1.335}	0.11	0.31
hexane(1)+decane(2)	WW70P1 = Pugachevich and Belyarov (1970)	323.15	7	EBE	1	{0.686}	0.24	1.29
hexane(1)+decane(2)	WW70P1 = Pugachevich and Belyarov (1970)	323.15	7	WSD	1	{1.071}	0.32	1.29
hexane(1)+decane(2)	WW70P1 = Pugachevich and Belyarov (1970)	323.15	7	JOAC1	1	{0.162}	0.44	1.29
hexane(1)+decane(2)	WW70P1 = Pugachevich and Belyarov (1970)	323.15	7	BCRG	1	{0.467}	0.24	1.29
hexane(1)+decane(2)	WW70P1 = Pugachevich and Belyarov (1970)	323.15	7	CW	2	{0.388, 0.302}	0.24	1.29
hexane(1)+decane(2)	WW70P1 = Pugachevich and Belyarov (1970)	323.15	7	RK2	2	{2.139, -0.319}	0.24	1.29
hexane(1)+decane(2)	WW70P1 = Pugachevich and Belyarov (1970)	323.15	7	JOAC2	2	{0.167, 0.044}	0.25	1.29
hexane(1)+decane(2)	WW70P1 = Pugachevich and Belyarov (1970)	323.15	7	FLW	2	{1.481, 0.665}	0.34	1.29
hexane(1)+decane(2)	WW70P1 = Pugachevich and Belyarov (1970)	323.15	7	QYDH	2	{0.696, 1.019}	0.24	1.29
hexane(1)+decane(2)	WW70P1 = Pugachevich and Belyarov (1970)	323.15	7	SIGMO	2	{7.694, 1.282}	0.51	1.29
hexane(1)+decane(2)	WW70P1 = Pugachevich and Belyarov (1970)	323.15	7	RK3	3	{2.144, -0.397, 0.358}	0.23	1.29
hexane(1)+decane(2)	WW70P1 = Pugachevich and Belyarov (1970)	323.15	7	JOAC3	3	{0.167, 0.047, 0.028}	0.24	1.29
hexane(1)+decane(2)	WW70P1 = Pugachevich and Belyarov (1970)	323.15	7	SFF	3	{-0.354, -0.247, 5.533}	0.22	1.29
hexane(1)+decane(2)	WW70P1 = Pugachevich and Belyarov (1970)	333.15	7	EBE	1	{0.644}	0.13	0.25
hexane(1)+decane(2)	WW70P1 = Pugachevich and Belyarov (1970)	333.15	7	WSD	1	{1.09}	0.19	0.35
hexane(1)+decane(2)	WW70P1 = Pugachevich and Belyarov (1970)	333.15	7	JOAC1	1	{0.201}	0.36	0.73
hexane(1)+decane(2)	WW70P1 = Pugachevich and Belyarov (1970)	333.15	7	BCRG	1	{0.429}	0.18	0.31
hexane(1)+decane(2)	WW70P1 = Pugachevich and Belyarov (1970)	333.15	7	CW	2	{0.307, 0.376}	0.13	0.25
hexane(1)+decane(2)	WW70P1 = Pugachevich and Belyarov (1970)	333.15	7	RK2	2	{2.583, -0.246}	0.13	0.25
hexane(1)+decane(2)	WW70P1 = Pugachevich and Belyarov (1970)	333.15	7	JOAC2	2	{0.206, 0.049}	0.13	0.25
hexane(1)+decane(2)	WW70P1 = Pugachevich and Belyarov (1970)	333.15	7	FLW	2	{1.631, 0.611}	0.2	0.38
hexane(1)+decane(2)	WW70P1 = Pugachevich and Belyarov (1970)	333.15	7	QYDH	2	{0.659, 1.046}	0.12	0.25
hexane(1)+decane(2)	WW70P1 = Pugachevich and Belyarov (1970)	333.15	7	SIGMO	2	{8.809, 1.344}	0.42	0.72
hexane(1)+decane(2)	WW70P1 = Pugachevich and Belyarov (1970)	333.15	7	RK3	3	{2.593, -0.371, 0.272}	0.12	0.25
hexane(1)+decane(2)	WW70P1 = Pugachevich and Belyarov (1970)	333.15	7	JOAC3	3	{0.206, 0.054, 0.027}	0.12	0.25
hexane(1)+decane(2)	WW70P1 = Pugachevich and Belyarov (1970)	333.15	7	SFF	3	{-0.421, -0.217, 5.441}	0.11	0.25
hexane(1)+decane(2)	WW70P1 = Pugachevich and Belyarov (1970)	343.15	7	EBE	1	{0.601}	0.35	1.15
hexane(1)+decane(2)	WW70P1 = Pugachevich and Belyarov (1970)	343.15	7	WSD	1	{1.111}	0.35	1.15
hexane(1)+decane(2)	WW70P1 = Pugachevich and Belyarov (1970)	343.15	7	JOAC1	1	{0.245}	0.56	1.15
hexane(1)+decane(2)	WW70P1 = Pugachevich and Belyarov (1970)	343.15	7	BCRG	1	{0.368}	0.43	1.15
hexane(1)+decane(2)	WW70P1 = Pugachevich and Belyarov (1970)	343.15	7	CW	2	{0.195, 0.461}	0.27	1.15
hexane(1)+decane(2)	WW70P1 = Pugachevich and Belyarov (1970)	343.15	7	RK2	2	{3.047, -0.352}	0.27	1.15
hexane(1)+decane(2)	WW70P1 = Pugachevich and Belyarov (1970)	343.15	7	JOAC2	2	{0.253, 0.07}	0.28	1.15
hexane(1)+decane(2)	WW70P1 = Pugachevich and Belyarov (1970)	343.15	7	FLW	2	{1.24, 0.716}	0.34	1.15
hexane(1)+decane(2)	WW70P1 = Pugachevich and Belyarov (1970)	343.15	7	QYDH	2	{0.631, 1.089}	0.27	1.15
hexane(1)+decane(2)	WW70P1 = Pugachevich and Belyarov (1970)	343.15	7	SIGMO	2	{7.704, 1.408}	0.59	1.15
hexane(1)+decane(2)	WW70P1 = Pugachevich and Belyarov (1970)	343.15	7	RK3	3	{3.033, -0.228, 0.211}	0.27	1.15
hexane(1)+decane(2)	WW70P1 = Pugachevich and Belyarov (1970)	343.15	7	JOAC3	3	{0.251, 0.062, 0.034}	0.27	1.15
hexane(1)+decane(2)	WW70P1 = Pugachevich and Belyarov (1970)	343.15	7	SFF	3	{-0.469, -0.105, 1.295}	0.27	1.15
hexane(1)+decane(2)	WW70P1 = Pugachevich and Belyarov (1970)	353.15	7	EBE	1	{0.568}	0.57	2.03
hexane(1)+decane(2)	WW70P1 = Pugachevich and Belyarov (1970)	353.15	7	WSD	1	{1.135}	0.46	2.03
hexane(1)+decane(2)	WW70P1 = Pugachevich and Belyarov (1970)	353.15	7	JOAC1	1	{0.294}	0.74	2.03
hexane(1)+decane(2)	WW70P1 = Pugachevich and Belyarov (1970)	353.15	7	BCRG	1	{0.33}	0.67	2.03
hexane(1)+decane(2)	WW70P1 = Pugachevich and Belyarov (1970)	353.15	7	CW	2	{0.177, 0.527}	0.39	2.03
hexane(1)+decane(2)	WW70P1 = Pugachevich and Belyarov (1970)	353.15	7	RK2	2	{3.5, -0.342}	0.38	2.03
hexane(1)+decane(2)	WW70P1 = Pugachevich and Belyarov (1970)	353.15	7	JOAC2	2	{0.304, 0.072}	0.39	2.03
hexane(1)+decane(2)	WW70P1 = Pugachevich and Belyarov (1970)	353.15	7	FLW	2	{1.043, 0.78}	0.46	2.03
hexane(1)+decane(2)	WW70P1 = Pugachevich and Belyarov (1970)	353.15	7	QYDH	2	{0.584, 1.086}	0.4	2.03
hexane(1)+decane(2)	WW70P1 = Pugachevich and Belyarov (1970)	353.15	7	SIGMO	2	{7.83, 1.474}	0.72	2.03
hexane(1)+decane(2)	WW70P1 = Pugachevich and Belyarov (1970)	353.15	7	RK3	3	{3.492, -0.243, -0.134}	0.38	2.03
hexane(1)+decane(2)	WW70P1 = Pugachevich and Belyarov (1970)	353.15	7	JOAC3	3	{0.301, 0.07, 0.01}	0.38	2.03
hexane(1)+decane(2)	WW70P1 = Pugachevich and Belyarov (1970)	353.15	7	SFF	3	{-0.518, -0.111, 0.885}	0.38	2.03
heptane(1)+eicosane(2)	WW2003QUE1 = Queimada et al. (2003)	313.15	5	EBE	1	{0.684}	0.23	1.05
heptane(1)+eicosane(2)	WW2003QUE1 = Queimada et al. (2003)	313.15	5	WSD	1	{1.098}	0.33	1.05
heptane(1)+eicosane(2)	WW2003QUE1 = Queimada et al. (2003)	313.15	5	JOAC1	1	{0.233}	0.49	1.05
heptane(1)+eicosane(2)	WW2003QUE1 = Queimada et al. (2003)	313.15	5	BCRG	1	{0.471}	0.24	1.05
heptane(1)+eicosane(2)	WW2003QUE1 = Queimada et al. (2003)	313.15	5	CW	2	{0.318, 0.316}	0.23	1.05
heptane(1)+eicosane(2)	WW2003QUE1 = Queimada et al. (2003)	313.15	5	RK2	2	{3.543, -0.671}	0.24	1.05
heptane(1)+eicosane(2)	WW2003QUE1 = Queimada et al. (2003)	313.15	5	JOAC2	2	{0.241, 0.071}	0.26	1.05
heptane(1)+eicosane(2)	WW2003QUE1 = Queimada et al. (2003)	313.15	5	FLW	2	{1.514, 0.657}	0.34	1.05
heptane(1)+eicosane(2)	WW2003QUE1 = Queimada et al. (2003)	313.15	5	QYDH	2	{0.683, 0.999}	0.23	1.05
heptane(1)+eicosane(2)	WW2003QUE1 = Queimada et al. (2003)	313.15	5	SIGMO	2	{5.86, 1.294}	0.51	1.05
heptane(1)+eicosane(2)	WW2003QUE1 = Queimada et al. (2003)	313.15	5	RK3	3	{3.443, -0.67, 0.405}	0.22	1.05
heptane(1)+eicosane(2)	WW2003QUE1 = Queimada et al. (2003)	313.15	5	JOAC3	3	{0.233, 0.071, 0.034}	0.22	1.05
heptane(1)+eicosane(2)	WW2003QUE1 = Queimada et al. (2003)	313.15	5	SFF	3	{-0.337, -0.15, 2.261}	0.22	1.05
heptane(1)+eicosane(2)	WW2003QUE1 = Queimada et al. (2003)	323.15	5	EBE	1	{0.618}	0.41	0.95
heptane(1)+eicosane(2)	WW2003QUE1 = Queimada et al. (2003)	323.15	5	WSD	1	{1.122}	0.48	0.95
heptane(1)+eicosane(2)	WW2003QUE1 = Queimada et al. (2003)	323.15	5	JOAC1	1	{0.261}	0.57	1.67
heptane(1)+eicosane(2)	WW2003QUE1 = Queimada et al. (2003)	323.15	5	BCRG	1	{0.391}	0.41	0.95
heptane(1)+eicosane(2)	WW2003QUE1 = Queimada et al. (2003)	323.15	5	CW	2	{0.301, 0.414}	0.41	0.95
heptane(1)+eicosane(2)	WW2003QUE1 = Queimada et al. (2003)	323.15	5	RK2	2	{4.608, -0.817}	0.41	0.95
heptane(1)+eicosane(2)	WW2003QUE1 = Queimada et al. (2003)	323.15	5	JOAC2	2	{0.304, 0.093}	0.44	1.09
heptane(1)+eicosane(2)	WW2003QUE1 = Queimada et al. (2003)	323.15	5	FLW	2	{2.297, 0.482}	0.52	1.42
heptane(1)+eicosane(2)	WW2003QUE1 = Queimada et al. (2003)	323.15	5	QYDH	2	{0.624, 1.032}	0.4	0.95
heptane(1)+eicosane(2)	WW2003QUE1 = Queimada et al. (2003)	323.15	5	SIGMO	2	{5.919, 1.321}	0.57	1.56
heptane(1)+eicosane(2)	WW2003QUE1 = Queimada et al. (2003)	323.15	5	RK3	3	{3.742, -0.809, 3.478}	0.22	0.95
heptane(1)+eicosane(2)	WW2003QUE1 = Queimada et al. (2003)	323.15	5	JOAC3	3	{0.261, 0.093, 0.175}	0.23	0.95
heptane(1)+eicosane(2)	WW2003QUE1 = Queimada et al. (2003)	323.15	5	SFF	3	{-0.425, -0.161, 1.411}	0.41	0.95
heptane(1)+eicosane(2)	WW2003QUE1 = Queimada et al. (2003)	333.15	5	EBE	1	{0.589}	0.42	0.9
heptane(1)+eicosane(2)	WW2003QUE1 = Queimada et al. (2003)	333.15	5	WSD	1	{1.15}	0.46	0.9
heptane(1)+eicosane(2)	WW2003QUE1 = Queimada et al. (2003)	333.15	5	JOAC1	1	{0.327}	0.66	1.45
heptane(1)+eicosane(2)	WW2003QUE1 = Queimada et al. (2003)	333.15	5	BCRG	1	{0.343}	0.48	0.9
heptane(1)+eicosane(2)	WW2003QUE1 = Queimada et al. (2003)	333.15	5	CW	2	{0.19, 0.51}	0.41	0.9
heptane(1)+eicosane(2)	WW2003QUE1 = Queimada et al. (2003)	333.15	5	RK2	2	{5.327, -0.561}	0.41	0.9
heptane(1)+eicosane(2)	WW2003QUE1 = Queimada et al. (2003)	333.15	5	JOAC2	2	{0.356, 0.097}	0.45	0.9
heptane(1)+eicosane(2)	WW2003QUE1 = Queimada et al. (2003)	333.15	5	FLW	2	{2.456, 0.456}	0.52	0.9
heptane(1)+eicosane(2)	WW2003QUE1 = Queimada et al. (2003)	333.15	5	QYDH	2	{0.606, 1.099}	0.39	0.9
heptane(1)+eicosane(2)	WW2003QUE1 = Queimada et al. (2003)	333.15	5	SIGMO	2	{5.418, 1.426}	0.62	1.2
heptane(1)+eicosane(2)	WW2003QUE1 = Queimada et al. (2003)	333.15	5	RK3	3	{4.822, -0.557, 2.028}	0.3	0.9
heptane(1)+eicosane(2)	WW2003QUE1 = Queimada et al. (2003)	333.15	5	JOAC3	3	{0.327, 0.096, 0.119}	0.3	0.9
heptane(1)+eicosane(2)	WW2003QUE1 = Queimada et al. (2003)	333.15	5	SFF	3	{-0.51, -1.266, 9.38}	0.34	0.9
heptane(1)+eicosane(2)	WW2003QUE1 = Queimada et al. (2003)	343.15	5	EBE	1	{0.514}	0.82	2.36
heptane(1)+eicosane(2)	WW2003QUE1 = Queimada et al. (2003)	343.15	5	WSD	1	{1.185}	0.45	1.18
heptane(1)+eicosane(2)	WW2003QUE1 = Queimada et al. (2003)	343.15	5	JOAC1	1	{0.395}	0.32	0.88
heptane(1)+eicosane(2)	WW2003QUE1 = Queimada et al. (2003)	343.15	5	BCRG	1	{0.252}	0.94	2.84
heptane(1)+eicosane(2)	WW2003QUE1 = Queimada et al. (2003)	343.15	5	CW	2	{-0.624, 0.759}	0.33	0.88
heptane(1)+eicosane(2)	WW2003QUE1 = Queimada et al. (2003)	343.15	5	RK2	2	{5.564, 1.323}	0.31	0.88
heptane(1)+eicosane(2)	WW2003QUE1 = Queimada et al. (2003)	343.15	5	JOAC2	2	{0.386, 0.018}	0.3	0.88
heptane(1)+eicosane(2)	WW2003QUE1 = Queimada et al. (2003)	343.15	5	FLW	2	{0.643, 1.023}	0.19	0.88
heptane(1)+eicosane(2)	WW2003QUE1 = Queimada et al. (2003)	343.15	5	QYDH	2	{0.69, 1.332}	0.32	0.88
heptane(1)+eicosane(2)	WW2003QUE1 = Queimada et al. (2003)	343.15	5	SIGMO	2	{1.23, 1.499}	0.34	0.88
heptane(1)+eicosane(2)	WW2003QUE1 = Queimada et al. (2003)	343.15	5	RK3	3	{6.079, 1.319, -2.069}	0.19	0.88
heptane(1)+eicosane(2)	WW2003QUE1 = Queimada et al. (2003)	343.15	5	JOAC3	3	{0.407, 0.018, -0.084}	0.19	0.88
heptane(1)+eicosane(2)	WW2003QUE1 = Queimada et al. (2003)	343.15	5	SFF	3	{-0.663, 0.452, 3.95}	0.21	0.88
hexadecane(1)+eicosane(2)	WW2002ROL1 = Rolo et al. (2002)	313.15	7	EBE	1	{0.454}	0.32	1.63
hexadecane(1)+eicosane(2)	WW2002ROL1 = Rolo et al. (2002)	313.15	7	WSD	1	{1.022}	0.38	1.63
hexadecane(1)+eicosane(2)	WW2002ROL1 = Rolo et al. (2002)	313.15	7	JOAC1	1	{0.044}	0.39	1.63
hexadecane(1)+eicosane(2)	WW2002ROL1 = Rolo et al. (2002)	313.15	7	BCRG	1	{0.209}	0.32	1.63
hexadecane(1)+eicosane(2)	WW2002ROL1 = Rolo et al. (2002)	313.15	7	CW	2	{0.612, 0.495}	0.31	1.63
hexadecane(1)+eicosane(2)	WW2002ROL1 = Rolo et al. (2002)	313.15	7	RK2	2	{1.276, -0.683}	0.32	1.63
hexadecane(1)+eicosane(2)	WW2002ROL1 = Rolo et al. (2002)	313.15	7	JOAC2	2	{0.05, 0.027}	0.32	1.63
hexadecane(1)+eicosane(2)	WW2002ROL1 = Rolo et al. (2002)	313.15	7	FLW	2	{2.545, 0.392}	0.4	1.63
hexadecane(1)+eicosane(2)	WW2002ROL1 = Rolo et al. (2002)	313.15	7	QYDH	2	{0.446, 0.917}	0.31	1.63
hexadecane(1)+eicosane(2)	WW2002ROL1 = Rolo et al. (2002)	313.15	7	SIGMO	2	{6.833, 1.545}	0.41	1.63
hexadecane(1)+eicosane(2)	WW2002ROL1 = Rolo et al. (2002)	313.15	7	RK3	3	{1.242, -0.568, 0.289}	0.31	1.63
hexadecane(1)+eicosane(2)	WW2002ROL1 = Rolo et al. (2002)	313.15	7	JOAC3	3	{0.048, 0.023, 0.012}	0.31	1.63
hexadecane(1)+eicosane(2)	WW2002ROL1 = Rolo et al. (2002)	313.15	7	SFF	3	{-0.549, -0.654, 1.987}	0.31	1.63
hexadecane(1)+eicosane(2)	WW2002ROL1 = Rolo et al. (2002)	323.15	7	EBE	1	{0.44}	0.44	1.24
hexadecane(1)+eicosane(2)	WW2002ROL1 = Rolo et al. (2002)	323.15	7	WSD	1	{1.03}	0.37	1.24
hexadecane(1)+eicosane(2)	WW2002ROL1 = Rolo et al. (2002)	323.15	7	JOAC1	1	{0.061}	0.37	1.24
hexadecane(1)+eicosane(2)	WW2002ROL1 = Rolo et al. (2002)	323.15	7	BCRG	1	{0.205}	0.46	1.24
hexadecane(1)+eicosane(2)	WW2002ROL1 = Rolo et al. (2002)	323.15	7	CW	2	{-3.533, 2.367}	0.33	1.24
hexadecane(1)+eicosane(2)	WW2002ROL1 = Rolo et al. (2002)	323.15	7	RK2	2	{1.538, -0.206}	0.37	1.24
hexadecane(1)+eicosane(2)	WW2002ROL1 = Rolo et al. (2002)	323.15	7	JOAC2	2	{0.061, 0.01}	0.37	1.24
hexadecane(1)+eicosane(2)	WW2002ROL1 = Rolo et al. (2002)	323.15	7	FLW	2	{0.682, 1.348}	0.42	1.24
hexadecane(1)+eicosane(2)	WW2002ROL1 = Rolo et al. (2002)	323.15	7	QYDH	2	{0.477, 1.362}	0.36	1.24
hexadecane(1)+eicosane(2)	WW2002ROL1 = Rolo et al. (2002)	323.15	7	SIGMO	2	{3.548, 1.915}	0.36	1.24
hexadecane(1)+eicosane(2)	WW2002ROL1 = Rolo et al. (2002)	323.15	7	RK3	3	{1.289, 0.492, 1.852}	0.28	1.24
hexadecane(1)+eicosane(2)	WW2002ROL1 = Rolo et al. (2002)	323.15	7	JOAC3	3	{0.052, -0.016, 0.07}	0.28	1.24
hexadecane(1)+eicosane(2)	WW2002ROL1 = Rolo et al. (2002)	323.15	7	SFF	3	{-0.891, -0.501, 6.278}	0.35	1.24
hexadecane(1)+eicosane(2)	WW2002ROL1 = Rolo et al. (2002)	333.15	7	EBE	1	{0.407}	0.5	1.03
hexadecane(1)+eicosane(2)	WW2002ROL1 = Rolo et al. (2002)	333.15	7	WSD	1	{1.031}	0.42	1.03
hexadecane(1)+eicosane(2)	WW2002ROL1 = Rolo et al. (2002)	333.15	7	JOAC1	1	{0.063}	0.42	1.03
hexadecane(1)+eicosane(2)	WW2002ROL1 = Rolo et al. (2002)	333.15	7	BCRG	1	{0.154}	0.53	1.03
hexadecane(1)+eicosane(2)	WW2002ROL1 = Rolo et al. (2002)	333.15	7	CW	2	{-3.426, 2.716}	0.39	1.03
hexadecane(1)+eicosane(2)	WW2002ROL1 = Rolo et al. (2002)	333.15	7	RK2	2	{1.55, 0.065}	0.41	1.03
hexadecane(1)+eicosane(2)	WW2002ROL1 = Rolo et al. (2002)	333.15	7	JOAC2	2	{0.064, 0.}	0.42	1.03
hexadecane(1)+eicosane(2)	WW2002ROL1 = Rolo et al. (2002)	333.15	7	FLW	2	{1.044, 0.902}	0.48	1.03
hexadecane(1)+eicosane(2)	WW2002ROL1 = Rolo et al. (2002)	333.15	7	QYDH	2	{0.495, 1.408}	0.42	1.03
hexadecane(1)+eicosane(2)	WW2002ROL1 = Rolo et al. (2002)	333.15	7	SIGMO	2	{3.177, 1.973}	0.42	1.03
hexadecane(1)+eicosane(2)	WW2002ROL1 = Rolo et al. (2002)	333.15	7	RK3	3	{1.54, 0.833, 1.307}	0.34	1.03
hexadecane(1)+eicosane(2)	WW2002ROL1 = Rolo et al. (2002)	333.15	7	JOAC3	3	{0.063, -0.03, 0.052}	0.34	1.03
hexadecane(1)+eicosane(2)	WW2002ROL1 = Rolo et al. (2002)	333.15	7	SFF	3	{-1.025, 0.069, 1.545}	0.42	1.03
hexadecane(1)+eicosane(2)	WW2002ROL1 = Rolo et al. (2002)	343.15	7	EBE	1	{0.386}	0.69	1.35
hexadecane(1)+eicosane(2)	WW2002ROL1 = Rolo et al. (2002)	343.15	7	WSD	1	{1.039}	0.52	1.2
hexadecane(1)+eicosane(2)	WW2002ROL1 = Rolo et al. (2002)	343.15	7	JOAC1	1	{0.077}	0.51	1.2
hexadecane(1)+eicosane(2)	WW2002ROL1 = Rolo et al. (2002)	343.15	7	BCRG	1	{0.136}	0.72	1.38
hexadecane(1)+eicosane(2)	WW2002ROL1 = Rolo et al. (2002)	343.15	7	CW	2	{-6.96, 5.036}	0.41	1.2
hexadecane(1)+eicosane(2)	WW2002ROL1 = Rolo et al. (2002)	343.15	7	RK2	2	{2.026, 0.692}	0.47	1.2
hexadecane(1)+eicosane(2)	WW2002ROL1 = Rolo et al. (2002)	343.15	7	JOAC2	2	{0.085, -0.027}	0.47	1.2
hexadecane(1)+eicosane(2)	WW2002ROL1 = Rolo et al. (2002)	343.15	7	FLW	2	{0.923, 0.994}	0.53	1.2
hexadecane(1)+eicosane(2)	WW2002ROL1 = Rolo et al. (2002)	343.15	7	QYDH	2	{0.556, 2.3}	0.51	1.2
hexadecane(1)+eicosane(2)	WW2002ROL1 = Rolo et al. (2002)	343.15	7	SIGMO	2	{0.093, 2.927}	0.51	1.2
hexadecane(1)+eicosane(2)	WW2002ROL1 = Rolo et al. (2002)	343.15	7	RK3	3	{1.603, 1.291, 2.174}	0.37	1.2
hexadecane(1)+eicosane(2)	WW2002ROL1 = Rolo et al. (2002)	343.15	7	JOAC3	3	{0.068, -0.05, 0.088}	0.37	1.2
hexadecane(1)+eicosane(2)	WW2002ROL1 = Rolo et al. (2002)	343.15	7	SFF	3	{-4.374, 3.726, 0.314}	0.44	1.2
heptane(1)+decane(2)	WW2002ROL1 = Rolo et al. (2002)	293.15	5	EBE	1	{0.446}	0.98	2.56
heptane(1)+decane(2)	WW2002ROL1 = Rolo et al. (2002)	293.15	5	WSD	1	{1.067}	0.84	2.56
heptane(1)+decane(2)	WW2002ROL1 = Rolo et al. (2002)	293.15	5	JOAC1	1	{0.138}	0.88	2.56
heptane(1)+decane(2)	WW2002ROL1 = Rolo et al. (2002)	293.15	5	BCRG	1	{0.182}	1.04	2.56
heptane(1)+decane(2)	WW2002ROL1 = Rolo et al. (2002)	293.15	5	CW	2	{0.086, 0.756}	0.83	2.56
heptane(1)+decane(2)	WW2002ROL1 = Rolo et al. (2002)	293.15	5	RK2	2	{2.87, -0.129}	0.83	2.56
heptane(1)+decane(2)	WW2002ROL1 = Rolo et al. (2002)	293.15	5	JOAC2	2	{0.143, 0.017}	0.84	2.56
heptane(1)+decane(2)	WW2002ROL1 = Rolo et al. (2002)	293.15	5	FLW	2	{3.175, 0.331}	0.94	2.56
heptane(1)+decane(2)	WW2002ROL1 = Rolo et al. (2002)	293.15	5	QYDH	2	{0.543, 1.313}	0.83	2.56
heptane(1)+decane(2)	WW2002ROL1 = Rolo et al. (2002)	293.15	5	SIGMO	2	{4.741, 1.695}	0.9	2.56
heptane(1)+decane(2)	WW2002ROL1 = Rolo et al. (2002)	293.15	5	RK3	3	{2.777, -0.131, 0.371}	0.81	2.56
heptane(1)+decane(2)	WW2002ROL1 = Rolo et al. (2002)	293.15	5	JOAC3	3	{0.138, 0.017, 0.02}	0.82	2.56
heptane(1)+decane(2)	WW2002ROL1 = Rolo et al. (2002)	293.15	5	SFF	3	{-0.765, -2.164, 13.512}	0.82	2.56
heptane(1)+decane(2)	WW2002ROL1 = Rolo et al. (2002)	303.15	5	EBE	1	{0.49}	0.83	1.85
heptane(1)+decane(2)	WW2002ROL1 = Rolo et al. (2002)	303.15	5	WSD	1	{1.063}	0.87	1.85
heptane(1)+decane(2)	WW2002ROL1 = Rolo et al. (2002)	303.15	5	JOAC1	1	{0.126}	0.88	1.85
heptane(1)+decane(2)	WW2002ROL1 = Rolo et al. (2002)	303.15	5	BCRG	1	{0.248}	0.82	1.85
heptane(1)+decane(2)	WW2002ROL1 = Rolo et al. (2002)	303.15	5	CW	2	{0.35, 0.609}	0.82	1.85
heptane(1)+decane(2)	WW2002ROL1 = Rolo et al. (2002)	303.15	5	RK2	2	{2.762, -0.586}	0.83	1.85
heptane(1)+decane(2)	WW2002ROL1 = Rolo et al. (2002)	303.15	5	JOAC2	2	{0.146, 0.039}	0.84	1.85
heptane(1)+decane(2)	WW2002ROL1 = Rolo et al. (2002)	303.15	5	FLW	2	{1.217, 0.734}	0.95	1.85
heptane(1)+decane(2)	WW2002ROL1 = Rolo et al. (2002)	303.15	5	QYDH	2	{0.508, 1.122}	0.81	1.85
heptane(1)+decane(2)	WW2002ROL1 = Rolo et al. (2002)	303.15	5	SIGMO	2	{4.991, 1.499}	0.88	1.85
heptane(1)+decane(2)	WW2002ROL1 = Rolo et al. (2002)	303.15	5	RK3	3	{1.997, -0.604, 3.048}	0.65	1.85
heptane(1)+decane(2)	WW2002ROL1 = Rolo et al. (2002)	303.15	5	JOAC3	3	{0.109, 0.04, 0.146}	0.65	1.85
heptane(1)+decane(2)	WW2002ROL1 = Rolo et al. (2002)	303.15	5	SFF	3	{-0.665, -0.432, 4.131}	0.8	1.85
heptane(1)+decane(2)	WW70P1 = Pugachevich and Belyarov (1970)	303.15	7	EBE	1	{0.81}	0.26	0.79
heptane(1)+decane(2)	WW70P1 = Pugachevich and Belyarov (1970)	303.15	7	WSD	1	{1.022}	0.28	0.79
heptane(1)+decane(2)	WW70P1 = Pugachevich and Belyarov (1970)	303.15	7	JOAC1	1	{0.052}	0.3	0.79
heptane(1)+decane(2)	WW70P1 = Pugachevich and Belyarov (1970)	303.15	7	BCRG	1	{0.655}	0.26	0.79
heptane(1)+decane(2)	WW70P1 = Pugachevich and Belyarov (1970)	303.15	7	CW	2	{0.706, 0.148}	0.18	0.79
heptane(1)+decane(2)	WW70P1 = Pugachevich and Belyarov (1970)	303.15	7	RK2	2	{0.916, -0.584}	0.17	0.79
heptane(1)+decane(2)	WW70P1 = Pugachevich and Belyarov (1970)	303.15	7	JOAC2	2	{0.06, 0.032}	0.17	0.79
heptane(1)+decane(2)	WW70P1 = Pugachevich and Belyarov (1970)	303.15	7	FLW	2	{1.25, 0.786}	0.33	0.79
heptane(1)+decane(2)	WW70P1 = Pugachevich and Belyarov (1970)	303.15	7	QYDH	2	{0.713, 0.886}	0.18	0.79
heptane(1)+decane(2)	WW70P1 = Pugachevich and Belyarov (1970)	303.15	7	SIGMO	2	{8.205, 1.156}	0.36	0.79
heptane(1)+decane(2)	WW70P1 = Pugachevich and Belyarov (1970)	303.15	7	RK3	3	{0.961, -0.577, -0.105}	0.17	0.79
heptane(1)+decane(2)	WW70P1 = Pugachevich and Belyarov (1970)	303.15	7	JOAC3	3	{0.059, 0.032, 0.002}	0.17	0.79
heptane(1)+decane(2)	WW70P1 = Pugachevich and Belyarov (1970)	303.15	7	SFF	3	{-0.07, -0.329, 0.837}	0.17	0.79
heptane(1)+decane(2)	WW2002ROL1 = Rolo et al. (2002)	313.15	5	EBE	1	{0.494}	0.8	2.02
heptane(1)+decane(2)	WW2002ROL1 = Rolo et al. (2002)	313.15	5	WSD	1	{1.062}	0.87	2.02
heptane(1)+decane(2)	WW2002ROL1 = Rolo et al. (2002)	313.15	5	JOAC1	1	{0.127}	0.89	2.02
heptane(1)+decane(2)	WW2002ROL1 = Rolo et al. (2002)	313.15	5	BCRG	1	{0.251}	0.8	2.02
heptane(1)+decane(2)	WW2002ROL1 = Rolo et al. (2002)	313.15	5	CW	2	{0.447, 0.542}	0.8	2.02
heptane(1)+decane(2)	WW2002ROL1 = Rolo et al. (2002)	313.15	5	RK2	2	{2.688, -0.773}	0.81	2.02
heptane(1)+decane(2)	WW2002ROL1 = Rolo et al. (2002)	313.15	5	JOAC2	2	{0.151, 0.051}	0.82	2.02
heptane(1)+decane(2)	WW2002ROL1 = Rolo et al. (2002)	313.15	5	FLW	2	{3.02, 0.347}	0.9	2.02
heptane(1)+decane(2)	WW2002ROL1 = Rolo et al. (2002)	313.15	5	QYDH	2	{0.5, 1.044}	0.8	2.02
heptane(1)+decane(2)	WW2002ROL1 = Rolo et al. (2002)	313.15	5	SIGMO	2	{4.839, 1.503}	0.94	2.02
heptane(1)+decane(2)	WW2002ROL1 = Rolo et al. (2002)	313.15	5	RK3	3	{2.222, -0.784, 1.857}	0.7	2.02
heptane(1)+decane(2)	WW2002ROL1 = Rolo et al. (2002)	313.15	5	JOAC3	3	{0.127, 0.051, 0.096}	0.7	2.02
heptane(1)+decane(2)	WW2002ROL1 = Rolo et al. (2002)	313.15	5	SFF	3	{-0.591, -0.455, 2.463}	0.78	2.02
heptane(1)+decane(2)	WW70P1 = Pugachevich and Belyarov (1970)	313.15	7	EBE	1	{0.614}	0.54	1.13
heptane(1)+decane(2)	WW70P1 = Pugachevich and Belyarov (1970)	313.15	7	WSD	1	{1.044}	0.62	1.24
heptane(1)+decane(2)	WW70P1 = Pugachevich and Belyarov (1970)	313.15	7	JOAC1	1	{0.09}	0.65	1.44
heptane(1)+decane(2)	WW70P1 = Pugachevich and Belyarov (1970)	313.15	7	BCRG	1	{0.311}	0.49	1.44
heptane(1)+decane(2)	WW70P1 = Pugachevich and Belyarov (1970)	313.15	7	CW	2	{0.922, 0.167}	0.34	0.9
heptane(1)+decane(2)	WW70P1 = Pugachevich and Belyarov (1970)	313.15	7	RK2	2	{1.599, -1.762}	0.36	0.75
heptane(1)+decane(2)	WW70P1 = Pugachevich and Belyarov (1970)	313.15	7	JOAC2	2	{0.099, 0.098}	0.37	0.79
heptane(1)+decane(2)	WW70P1 = Pugachevich and Belyarov (1970)	313.15	7	FLW	2	{1.701, 0.575}	0.62	1.72
heptane(1)+decane(2)	WW70P1 = Pugachevich and Belyarov (1970)	313.15	7	QYDH	2	{0.511, 0.652}	0.39	0.88
heptane(1)+decane(2)	WW70P1 = Pugachevich and Belyarov (1970)	313.15	7	SIGMO	2	{8.212, 1.243}	0.67	1.8
heptane(1)+decane(2)	WW70P1 = Pugachevich and Belyarov (1970)	313.15	7	RK3	3	{0.877, -0.812, 2.945}	0.26	0.95
heptane(1)+decane(2)	WW70P1 = Pugachevich and Belyarov (1970)	313.15	7	JOAC3	3	{0.062, 0.052, 0.147}	0.25	0.91
heptane(1)+decane(2)	WW70P1 = Pugachevich and Belyarov (1970)	313.15	7	SFF	3	{-0.213, -0.947, 3.347}	0.32	0.78
heptane(1)+decane(2)	WW2002ROL1 = Rolo et al. (2002)	323.15	5	EBE	1	{0.466}	0.77	2.17
heptane(1)+decane(2)	WW2002ROL1 = Rolo et al. (2002)	323.15	5	WSD	1	{1.074}	0.84	2.17
heptane(1)+decane(2)	WW2002ROL1 = Rolo et al. (2002)	323.15	5	JOAC1	1	{0.15}	0.87	2.17
heptane(1)+decane(2)	WW2002ROL1 = Rolo et al. (2002)	323.15	5	BCRG	1	{0.224}	0.77	2.17
heptane(1)+decane(2)	WW2002ROL1 = Rolo et al. (2002)	323.15	5	CW	2	{0.684, 0.434}	0.77	2.17
heptane(1)+decane(2)	WW2002ROL1 = Rolo et al. (2002)	323.15	5	RK2	2	{3.02, -0.793}	0.78	2.17
heptane(1)+decane(2)	WW2002ROL1 = Rolo et al. (2002)	323.15	5	JOAC2	2	{0.177, 0.057}	0.79	2.17
heptane(1)+decane(2)	WW2002ROL1 = Rolo et al. (2002)	323.15	5	FLW	2	{3.551, 0.302}	0.87	2.17
heptane(1)+decane(2)	WW2002ROL1 = Rolo et al. (2002)	323.15	5	QYDH	2	{0.48, 1.103}	0.76	2.17
heptane(1)+decane(2)	WW2002ROL1 = Rolo et al. (2002)	323.15	5	SIGMO	2	{5.422, 1.576}	0.91	2.17
heptane(1)+decane(2)	WW2002ROL1 = Rolo et al. (2002)	323.15	5	RK3	3	{2.531, -0.804, 1.95}	0.66	2.17
heptane(1)+decane(2)	WW2002ROL1 = Rolo et al. (2002)	323.15	5	JOAC3	3	{0.15, 0.058, 0.107}	0.66	2.17
heptane(1)+decane(2)	WW2002ROL1 = Rolo et al. (2002)	323.15	5	SFF	3	{-0.674, -0.405, 2.733}	0.76	2.17
heptane(1)+decane(2)	WW70P1 = Pugachevich and Belyarov (1970)	323.15	7	EBE	1	{0.555}	0.61	1.54
heptane(1)+decane(2)	WW70P1 = Pugachevich and Belyarov (1970)	323.15	7	WSD	1	{1.056}	0.74	1.29
heptane(1)+decane(2)	WW70P1 = Pugachevich and Belyarov (1970)	323.15	7	JOAC1	1	{0.114}	0.77	1.5
heptane(1)+decane(2)	WW70P1 = Pugachevich and Belyarov (1970)	323.15	7	BCRG	1	{0.324}	0.59	1.35
heptane(1)+decane(2)	WW70P1 = Pugachevich and Belyarov (1970)	323.15	7	CW	2	{0.909, 0.168}	0.47	1.29
heptane(1)+decane(2)	WW70P1 = Pugachevich and Belyarov (1970)	323.15	7	RK2	2	{1.582, -1.685}	0.49	1.03
heptane(1)+decane(2)	WW70P1 = Pugachevich and Belyarov (1970)	323.15	7	JOAC2	2	{0.105, 0.099}	0.5	1.06
heptane(1)+decane(2)	WW70P1 = Pugachevich and Belyarov (1970)	323.15	7	FLW	2	{2.126, 0.469}	0.69	2.17
heptane(1)+decane(2)	WW70P1 = Pugachevich and Belyarov (1970)	323.15	7	QYDH	2	{0.524, 0.673}	0.52	1.16
heptane(1)+decane(2)	WW70P1 = Pugachevich and Belyarov (1970)	323.15	7	SIGMO	2	{34473.119, 1.312}	0.8	1.9
heptane(1)+decane(2)	WW70P1 = Pugachevich and Belyarov (1970)	323.15	7	RK3	3	{0.938, -0.465, 3.173}	0.39	1.38
heptane(1)+decane(2)	WW70P1 = Pugachevich and Belyarov (1970)	323.15	7	JOAC3	3	{0.069, 0.037, 0.167}	0.39	1.35
heptane(1)+decane(2)	WW70P1 = Pugachevich and Belyarov (1970)	323.15	7	SFF	3	{-0.214, -0.889, 3.346}	0.44	1.19
heptane(1)+decane(2)	WW2002ROL1 = Rolo et al. (2002)	333.15	5	EBE	1	{0.455}	0.82	2.05
heptane(1)+decane(2)	WW2002ROL1 = Rolo et al. (2002)	333.15	5	WSD	1	{1.09}	0.81	2.05
heptane(1)+decane(2)	WW2002ROL1 = Rolo et al. (2002)	333.15	5	JOAC1	1	{0.18}	0.85	2.05
heptane(1)+decane(2)	WW2002ROL1 = Rolo et al. (2002)	333.15	5	BCRG	1	{0.19}	0.9	2.05
heptane(1)+decane(2)	WW2002ROL1 = Rolo et al. (2002)	333.15	5	CW	2	{0.235, 0.737}	0.77	2.05
heptane(1)+decane(2)	WW2002ROL1 = Rolo et al. (2002)	333.15	5	RK2	2	{3.277, -0.436}	0.78	2.05
heptane(1)+decane(2)	WW2002ROL1 = Rolo et al. (2002)	333.15	5	JOAC2	2	{0.201, 0.044}	0.79	2.05
heptane(1)+decane(2)	WW2002ROL1 = Rolo et al. (2002)	333.15	5	FLW	2	{3.587, 0.3}	0.9	2.05
heptane(1)+decane(2)	WW2002ROL1 = Rolo et al. (2002)	333.15	5	QYDH	2	{0.502, 1.27}	0.76	2.05
heptane(1)+decane(2)	WW2002ROL1 = Rolo et al. (2002)	333.15	5	SIGMO	2	{4.772, 1.676}	0.86	2.05
heptane(1)+decane(2)	WW2002ROL1 = Rolo et al. (2002)	333.15	5	RK3	3	{2.923, -0.445, 1.411}	0.68	2.05
heptane(1)+decane(2)	WW2002ROL1 = Rolo et al. (2002)	333.15	5	JOAC3	3	{0.18, 0.044, 0.083}	0.69	2.05
heptane(1)+decane(2)	WW2002ROL1 = Rolo et al. (2002)	333.15	5	SFF	3	{-0.781, -0.351, 4.027}	0.74	2.05
heptane(1)+decane(2)	WW70P1 = Pugachevich and Belyarov (1970)	333.15	7	EBE	1	{0.509}	0.72	1.75
heptane(1)+decane(2)	WW70P1 = Pugachevich and Belyarov (1970)	333.15	7	WSD	1	{1.066}	0.89	1.47
heptane(1)+decane(2)	WW70P1 = Pugachevich and Belyarov (1970)	333.15	7	JOAC1	1	{0.134}	0.94	1.75
heptane(1)+decane(2)	WW70P1 = Pugachevich and Belyarov (1970)	333.15	7	BCRG	1	{0.276}	0.69	1.49
heptane(1)+decane(2)	WW70P1 = Pugachevich and Belyarov (1970)	333.15	7	CW	2	{0.895, 0.206}	0.56	1.32
heptane(1)+decane(2)	WW70P1 = Pugachevich and Belyarov (1970)	333.15	7	RK2	2	{1.917, -1.972}	0.57	1.16
heptane(1)+decane(2)	WW70P1 = Pugachevich and Belyarov (1970)	333.15	7	JOAC2	2	{0.131, 0.123}	0.59	1.19
heptane(1)+decane(2)	WW70P1 = Pugachevich and Belyarov (1970)	333.15	7	FLW	2	{2.341, 0.427}	0.79	2.39
heptane(1)+decane(2)	WW70P1 = Pugachevich and Belyarov (1970)	333.15	7	QYDH	2	{0.479, 0.647}	0.61	1.27
heptane(1)+decane(2)	WW70P1 = Pugachevich and Belyarov (1970)	333.15	7	SIGMO	2	{644.915, 1.359}	0.96	2.17
heptane(1)+decane(2)	WW70P1 = Pugachevich and Belyarov (1970)	333.15	7	RK3	3	{1.176, -0.664, 3.512}	0.47	1.42
heptane(1)+decane(2)	WW70P1 = Pugachevich and Belyarov (1970)	333.15	7	JOAC3	3	{0.088, 0.054, 0.194}	0.45	1.36
heptane(1)+decane(2)	WW70P1 = Pugachevich and Belyarov (1970)	333.15	7	SFF	3	{-0.262, -1.022, 3.339}	0.52	1.21
heptane(1)+decane(2)	WW70P1 = Pugachevich and Belyarov (1970)	343.15	7	EBE	1	{0.501}	0.66	1.36
heptane(1)+decane(2)	WW70P1 = Pugachevich and Belyarov (1970)	343.15	7	WSD	1	{1.086}	0.84	1.64
heptane(1)+decane(2)	WW70P1 = Pugachevich and Belyarov (1970)	343.15	7	JOAC1	1	{0.17}	0.91	1.71
heptane(1)+decane(2)	WW70P1 = Pugachevich and Belyarov (1970)	343.15	7	BCRG	1	{0.267}	0.63	1.09
heptane(1)+decane(2)	WW70P1 = Pugachevich and Belyarov (1970)	343.15	7	CW	2	{0.853, 0.243}	0.51	1.49
heptane(1)+decane(2)	WW70P1 = Pugachevich and Belyarov (1970)	343.15	7	RK2	2	{2.083, -1.96}	0.53	1.47
heptane(1)+decane(2)	WW70P1 = Pugachevich and Belyarov (1970)	343.15	7	JOAC2	2	{0.15, 0.131}	0.54	1.52
heptane(1)+decane(2)	WW70P1 = Pugachevich and Belyarov (1970)	343.15	7	FLW	2	{2.386, 0.419}	0.73	2.04
heptane(1)+decane(2)	WW70P1 = Pugachevich and Belyarov (1970)	343.15	7	QYDH	2	{0.473, 0.672}	0.55	1.58
heptane(1)+decane(2)	WW70P1 = Pugachevich and Belyarov (1970)	343.15	7	SIGMO	2	{5.883, 1.481}	0.92	2.06
heptane(1)+decane(2)	WW70P1 = Pugachevich and Belyarov (1970)	343.15	7	RK3	3	{1.577, -0.388, 3.393}	0.46	1.58
heptane(1)+decane(2)	WW70P1 = Pugachevich and Belyarov (1970)	343.15	7	JOAC3	3	{0.118, 0.044, 0.197}	0.45	1.51
heptane(1)+decane(2)	WW70P1 = Pugachevich and Belyarov (1970)	343.15	7	SFF	3	{-0.281, -0.91, 2.596}	0.48	1.31
heptane(1)+decane(2)	WW70P1 = Pugachevich and Belyarov (1970)	353.15	7	EBE	1	{0.469}	0.5	1.24
heptane(1)+decane(2)	WW70P1 = Pugachevich and Belyarov (1970)	353.15	7	WSD	1	{1.1}	0.74	1.55
heptane(1)+decane(2)	WW70P1 = Pugachevich and Belyarov (1970)	353.15	7	JOAC1	1	{0.196}	0.82	2.06
heptane(1)+decane(2)	WW70P1 = Pugachevich and Belyarov (1970)	353.15	7	BCRG	1	{0.236}	0.46	1.1
heptane(1)+decane(2)	WW70P1 = Pugachevich and Belyarov (1970)	353.15	7	CW	2	{0.636, 0.447}	0.45	1.11
heptane(1)+decane(2)	WW70P1 = Pugachevich and Belyarov (1970)	353.15	7	RK2	2	{2.845, -1.51}	0.47	1.07
heptane(1)+decane(2)	WW70P1 = Pugachevich and Belyarov (1970)	353.15	7	JOAC2	2	{0.206, 0.118}	0.48	1.19
heptane(1)+decane(2)	WW70P1 = Pugachevich and Belyarov (1970)	353.15	7	FLW	2	{2.577, 0.389}	0.57	1.95
heptane(1)+decane(2)	WW70P1 = Pugachevich and Belyarov (1970)	353.15	7	QYDH	2	{0.46, 0.89}	0.46	1.04
heptane(1)+decane(2)	WW70P1 = Pugachevich and Belyarov (1970)	353.15	7	SIGMO	2	{5.605, 1.544}	0.82	2.33
heptane(1)+decane(2)	WW70P1 = Pugachevich and Belyarov (1970)	353.15	7	RK3	3	{1.98, -0.537, 3.285}	0.32	1.64
heptane(1)+decane(2)	WW70P1 = Pugachevich and Belyarov (1970)	353.15	7	JOAC3	3	{0.151, 0.062, 0.199}	0.3	1.56
heptane(1)+decane(2)	WW70P1 = Pugachevich and Belyarov (1970)	353.15	7	SFF	3	{-0.535, -0.748, 3.259}	0.42	1.25
decane(1)+hexadecane(2)	WW2002ROL1 = Rolo et al. (2002)	293.15	5	EBE	1	{0.521}	1.11	2.56
decane(1)+hexadecane(2)	WW2002ROL1 = Rolo et al. (2002)	293.15	5	WSD	1	{1.057}	1.09	2.56
decane(1)+hexadecane(2)	WW2002ROL1 = Rolo et al. (2002)	293.15	5	JOAC1	1	{0.12}	1.08	2.56
decane(1)+hexadecane(2)	WW2002ROL1 = Rolo et al. (2002)	293.15	5	BCRG	1	{0.279}	1.11	2.56
decane(1)+hexadecane(2)	WW2002ROL1 = Rolo et al. (2002)	293.15	5	CW	2	{-0.147, 0.831}	1.08	2.56
decane(1)+hexadecane(2)	WW2002ROL1 = Rolo et al. (2002)	293.15	5	RK2	2	{2.864, 0.196}	1.08	2.56
decane(1)+hexadecane(2)	WW2002ROL1 = Rolo et al. (2002)	293.15	5	JOAC2	2	{0.121, 0.001}	1.09	2.56
decane(1)+hexadecane(2)	WW2002ROL1 = Rolo et al. (2002)	293.15	5	FLW	2	{0.868, 0.999}	1.18	2.56
decane(1)+hexadecane(2)	WW2002ROL1 = Rolo et al. (2002)	293.15	5	QYDH	2	{0.586, 1.408}	1.08	2.56
decane(1)+hexadecane(2)	WW2002ROL1 = Rolo et al. (2002)	293.15	5	SIGMO	2	{4.53, 1.662}	1.08	2.56
decane(1)+hexadecane(2)	WW2002ROL1 = Rolo et al. (2002)	293.15	5	RK3	3	{2.017, 0.182, 3.361}	0.92	2.56
decane(1)+hexadecane(2)	WW2002ROL1 = Rolo et al. (2002)	293.15	5	JOAC3	3	{0.088, 0.001, 0.129}	0.92	2.56
decane(1)+hexadecane(2)	WW2002ROL1 = Rolo et al. (2002)	293.15	5	SFF	3	{-0.816, 0.101, 1.425}	1.08	2.56
decane(1)+hexadecane(2)	WW2002ROL1 = Rolo et al. (2002)	303.15	5	EBE	1	{0.48}	0.73	1.85
decane(1)+hexadecane(2)	WW2002ROL1 = Rolo et al. (2002)	303.15	5	WSD	1	{1.058}	0.71	1.85
decane(1)+hexadecane(2)	WW2002ROL1 = Rolo et al. (2002)	303.15	5	JOAC1	1	{0.12}	0.74	1.85
decane(1)+hexadecane(2)	WW2002ROL1 = Rolo et al. (2002)	303.15	5	BCRG	1	{0.205}	0.78	1.85
decane(1)+hexadecane(2)	WW2002ROL1 = Rolo et al. (2002)	303.15	5	CW	2	{0.319, 0.55}	0.69	1.85
decane(1)+hexadecane(2)	WW2002ROL1 = Rolo et al. (2002)	303.15	5	RK2	2	{2.487, -0.473}	0.69	1.85
decane(1)+hexadecane(2)	WW2002ROL1 = Rolo et al. (2002)	303.15	5	JOAC2	2	{0.111, 0.027}	0.69	1.85
decane(1)+hexadecane(2)	WW2002ROL1 = Rolo et al. (2002)	303.15	5	FLW	2	{1.201, 0.763}	0.7	1.85
decane(1)+hexadecane(2)	WW2002ROL1 = Rolo et al. (2002)	303.15	5	QYDH	2	{0.546, 1.092}	0.7	1.85
decane(1)+hexadecane(2)	WW2002ROL1 = Rolo et al. (2002)	303.15	5	SIGMO	2	{4.687, 1.645}	0.77	1.85
decane(1)+hexadecane(2)	WW2002ROL1 = Rolo et al. (2002)	303.15	5	RK3	3	{2.715, -0.468, -0.905}	0.64	1.85
decane(1)+hexadecane(2)	WW2002ROL1 = Rolo et al. (2002)	303.15	5	JOAC3	3	{0.12, 0.027, -0.032}	0.65	1.85
decane(1)+hexadecane(2)	WW2002ROL1 = Rolo et al. (2002)	303.15	5	SFF	3	{-0.55, -0.241, 1.155}	0.69	1.85
decane(1)+hexadecane(2)	WW2002ROL1 = Rolo et al. (2002)	313.15	5	EBE	1	{0.388}	0.97	2.02
decane(1)+hexadecane(2)	WW2002ROL1 = Rolo et al. (2002)	313.15	5	WSD	1	{1.069}	0.79	2.02
decane(1)+hexadecane(2)	WW2002ROL1 = Rolo et al. (2002)	313.15	5	JOAC1	1	{0.147}	0.8	2.02
decane(1)+hexadecane(2)	WW2002ROL1 = Rolo et al. (2002)	313.15	5	BCRG	1	{0.149}	1.06	2.02
decane(1)+hexadecane(2)	WW2002ROL1 = Rolo et al. (2002)	313.15	5	CW	2	{0.008, 0.808}	0.78	2.02
decane(1)+hexadecane(2)	WW2002ROL1 = Rolo et al. (2002)	313.15	5	RK2	2	{3.112, -0.014}	0.78	2.02
decane(1)+hexadecane(2)	WW2002ROL1 = Rolo et al. (2002)	313.15	5	JOAC2	2	{0.142, 0.011}	0.78	2.02
decane(1)+hexadecane(2)	WW2002ROL1 = Rolo et al. (2002)	313.15	5	FLW	2	{0.926, 0.927}	0.78	2.02
decane(1)+hexadecane(2)	WW2002ROL1 = Rolo et al. (2002)	313.15	5	QYDH	2	{0.588, 1.601}	0.79	2.02
decane(1)+hexadecane(2)	WW2002ROL1 = Rolo et al. (2002)	313.15	5	SIGMO	2	{2.295, 1.79}	0.8	2.02
decane(1)+hexadecane(2)	WW2002ROL1 = Rolo et al. (2002)	313.15	5	RK3	3	{3.383, -0.01, -1.076}	0.73	2.02
decane(1)+hexadecane(2)	WW2002ROL1 = Rolo et al. (2002)	313.15	5	JOAC3	3	{0.152, 0.011, -0.041}	0.73	2.02
decane(1)+hexadecane(2)	WW2002ROL1 = Rolo et al. (2002)	313.15	5	SFF	3	{-0.807, -0.008, 0.885}	0.78	2.02
decane(1)+hexadecane(2)	WW2002ROL1 = Rolo et al. (2002)	323.15	5	EBE	1	{0.486}	0.91	2.17
decane(1)+hexadecane(2)	WW2002ROL1 = Rolo et al. (2002)	323.15	5	WSD	1	{1.066}	0.8	2.17
decane(1)+hexadecane(2)	WW2002ROL1 = Rolo et al. (2002)	323.15	5	JOAC1	1	{0.144}	0.79	2.17
decane(1)+hexadecane(2)	WW2002ROL1 = Rolo et al. (2002)	323.15	5	BCRG	1	{0.221}	0.96	2.17
decane(1)+hexadecane(2)	WW2002ROL1 = Rolo et al. (2002)	323.15	5	CW	2	{-0.378, 0.948}	0.77	2.17
decane(1)+hexadecane(2)	WW2002ROL1 = Rolo et al. (2002)	323.15	5	RK2	2	{3.134, 0.498}	0.77	2.17
decane(1)+hexadecane(2)	WW2002ROL1 = Rolo et al. (2002)	323.15	5	JOAC2	2	{0.149, -0.01}	0.78	2.17
decane(1)+hexadecane(2)	WW2002ROL1 = Rolo et al. (2002)	323.15	5	FLW	2	{2.38, 0.426}	0.91	2.17
decane(1)+hexadecane(2)	WW2002ROL1 = Rolo et al. (2002)	323.15	5	QYDH	2	{0.612, 1.538}	0.78	2.17
decane(1)+hexadecane(2)	WW2002ROL1 = Rolo et al. (2002)	323.15	5	SIGMO	2	{0.649, 1.8}	0.77	2.17
decane(1)+hexadecane(2)	WW2002ROL1 = Rolo et al. (2002)	323.15	5	RK3	3	{2.7, 0.492, 1.722}	0.68	2.17
decane(1)+hexadecane(2)	WW2002ROL1 = Rolo et al. (2002)	323.15	5	JOAC3	3	{0.13, -0.01, 0.074}	0.69	2.17
decane(1)+hexadecane(2)	WW2002ROL1 = Rolo et al. (2002)	323.15	5	SFF	3	{-0.905, 0.214, 0.892}	0.78	2.17
decane(1)+hexadecane(2)	WW2002ROL1 = Rolo et al. (2002)	333.15	5	EBE	1	{0.475}	0.84	2.05
decane(1)+hexadecane(2)	WW2002ROL1 = Rolo et al. (2002)	333.15	5	WSD	1	{1.068}	0.67	2.05
decane(1)+hexadecane(2)	WW2002ROL1 = Rolo et al. (2002)	333.15	5	JOAC1	1	{0.142}	0.62	2.05
decane(1)+hexadecane(2)	WW2002ROL1 = Rolo et al. (2002)	333.15	5	BCRG	1	{0.21}	0.9	2.05
decane(1)+hexadecane(2)	WW2002ROL1 = Rolo et al. (2002)	333.15	5	CW	2	{-0.254, 0.798}	0.62	2.05
decane(1)+hexadecane(2)	WW2002ROL1 = Rolo et al. (2002)	333.15	5	RK2	2	{2.82, 0.318}	0.62	2.05
decane(1)+hexadecane(2)	WW2002ROL1 = Rolo et al. (2002)	333.15	5	JOAC2	2	{0.142, -0.002}	0.62	2.05
decane(1)+hexadecane(2)	WW2002ROL1 = Rolo et al. (2002)	333.15	5	FLW	2	{0.821, 1.026}	0.73	2.05
decane(1)+hexadecane(2)	WW2002ROL1 = Rolo et al. (2002)	333.15	5	QYDH	2	{0.616, 1.372}	0.62	2.05
decane(1)+hexadecane(2)	WW2002ROL1 = Rolo et al. (2002)	333.15	5	SIGMO	2	{4.519, 1.635}	0.64	2.05
decane(1)+hexadecane(2)	WW2002ROL1 = Rolo et al. (2002)	333.15	5	RK3	3	{2.826, 0.318, -0.021}	0.62	2.05
decane(1)+hexadecane(2)	WW2002ROL1 = Rolo et al. (2002)	333.15	5	JOAC3	3	{0.142, -0.002, 0.001}	0.62	2.05
decane(1)+hexadecane(2)	WW2002ROL1 = Rolo et al. (2002)	333.15	5	SFF	3	{-0.772, 0.153, 1.432}	0.62	2.05
decane(1)+docosane(2)	WW2005QUE1 = Queimada et al. (2005)	323.15	7	EBE	1	{0.498}	1.05	1.69
decane(1)+docosane(2)	WW2005QUE1 = Queimada et al. (2005)	323.15	7	WSD	1	{1.091}	0.82	1.69
decane(1)+docosane(2)	WW2005QUE1 = Queimada et al. (2005)	323.15	7	JOAC1	1	{0.189}	0.74	1.69
decane(1)+docosane(2)	WW2005QUE1 = Queimada et al. (2005)	323.15	7	BCRG	1	{0.304}	1.11	1.73
decane(1)+docosane(2)	WW2005QUE1 = Queimada et al. (2005)	323.15	7	CW	2	{-1.997, 1.337}	0.57	1.69
decane(1)+docosane(2)	WW2005QUE1 = Queimada et al. (2005)	323.15	7	RK2	2	{3.987, 2.354}	0.56	1.69
decane(1)+docosane(2)	WW2005QUE1 = Queimada et al. (2005)	323.15	7	JOAC2	2	{0.193, -0.077}	0.56	1.69
decane(1)+docosane(2)	WW2005QUE1 = Queimada et al. (2005)	323.15	7	FLW	2	{0.615, 1.253}	0.61	1.69
decane(1)+docosane(2)	WW2005QUE1 = Queimada et al. (2005)	323.15	7	QYDH	2	{0.784, 1.669}	0.57	1.69
decane(1)+docosane(2)	WW2005QUE1 = Queimada et al. (2005)	323.15	7	SIGMO	2	{0.105, 2.088}	0.57	1.69
decane(1)+docosane(2)	WW2005QUE1 = Queimada et al. (2005)	323.15	7	RK3	3	{3.988, 2.53, 0.291}	0.55	1.69
decane(1)+docosane(2)	WW2005QUE1 = Queimada et al. (2005)	323.15	7	JOAC3	3	{0.193, -0.08, 0.005}	0.55	1.69
decane(1)+docosane(2)	WW2005QUE1 = Queimada et al. (2005)	323.15	7	SFF	3	{-1.217, 0.928, 0.785}	0.55	1.69
decane(1)+docosane(2)	WW2005QUE1 = Queimada et al. (2005)	333.15	7	EBE	1	{0.511}	0.87	1.93
decane(1)+docosane(2)	WW2005QUE1 = Queimada et al. (2005)	333.15	7	WSD	1	{1.096}	0.79	1.76
decane(1)+docosane(2)	WW2005QUE1 = Queimada et al. (2005)	333.15	7	JOAC1	1	{0.2}	0.77	1.76
decane(1)+docosane(2)	WW2005QUE1 = Queimada et al. (2005)	333.15	7	BCRG	1	{0.289}	0.94	2.17
decane(1)+docosane(2)	WW2005QUE1 = Queimada et al. (2005)	333.15	7	CW	2	{-0.826, 0.915}	0.75	1.76
decane(1)+docosane(2)	WW2005QUE1 = Queimada et al. (2005)	333.15	7	RK2	2	{3.923, 0.572}	0.76	1.76
decane(1)+docosane(2)	WW2005QUE1 = Queimada et al. (2005)	333.15	7	JOAC2	2	{0.2, 0.}	0.77	1.76
decane(1)+docosane(2)	WW2005QUE1 = Queimada et al. (2005)	333.15	7	FLW	2	{0.734, 1.084}	0.86	1.76
decane(1)+docosane(2)	WW2005QUE1 = Queimada et al. (2005)	333.15	7	QYDH	2	{0.645, 1.337}	0.76	1.76
decane(1)+docosane(2)	WW2005QUE1 = Queimada et al. (2005)	333.15	7	SIGMO	2	{3.46, 1.565}	0.74	1.76
decane(1)+docosane(2)	WW2005QUE1 = Queimada et al. (2005)	333.15	7	RK3	3	{3.817, 1.497, 4.752}	0.5	1.76
decane(1)+docosane(2)	WW2005QUE1 = Queimada et al. (2005)	333.15	7	JOAC3	3	{0.194, -0.029, 0.203}	0.5	1.76
decane(1)+docosane(2)	WW2005QUE1 = Queimada et al. (2005)	333.15	7	SFF	3	{-0.735, 0.196, 1.178}	0.77	1.76
decane(1)+docosane(2)	WW2005QUE1 = Queimada et al. (2005)	343.15	7	EBE	1	{0.491}	0.79	1.92
decane(1)+docosane(2)	WW2005QUE1 = Queimada et al. (2005)	343.15	7	WSD	1	{1.113}	0.92	1.92
decane(1)+docosane(2)	WW2005QUE1 = Queimada et al. (2005)	343.15	7	JOAC1	1	{0.244}	0.96	1.92
decane(1)+docosane(2)	WW2005QUE1 = Queimada et al. (2005)	343.15	7	BCRG	1	{0.235}	0.74	1.92
decane(1)+docosane(2)	WW2005QUE1 = Queimada et al. (2005)	343.15	7	CW	2	{0.724, 0.415}	0.73	1.92
decane(1)+docosane(2)	WW2005QUE1 = Queimada et al. (2005)	343.15	7	RK2	2	{4.199, -1.833}	0.81	1.92
decane(1)+docosane(2)	WW2005QUE1 = Queimada et al. (2005)	343.15	7	JOAC2	2	{0.223, 0.107}	0.84	1.92
decane(1)+docosane(2)	WW2005QUE1 = Queimada et al. (2005)	343.15	7	FLW	2	{2.112, 0.474}	0.9	1.92
decane(1)+docosane(2)	WW2005QUE1 = Queimada et al. (2005)	343.15	7	QYDH	2	{0.472, 0.924}	0.77	1.92
decane(1)+docosane(2)	WW2005QUE1 = Queimada et al. (2005)	343.15	7	SIGMO	2	{4.52, 1.679}	0.93	1.92
decane(1)+docosane(2)	WW2005QUE1 = Queimada et al. (2005)	343.15	7	RK3	3	{3.996, -0.146, 5.703}	0.53	1.92
decane(1)+docosane(2)	WW2005QUE1 = Queimada et al. (2005)	343.15	7	JOAC3	3	{0.214, 0.046, 0.256}	0.52	1.92
decane(1)+docosane(2)	WW2005QUE1 = Queimada et al. (2005)	343.15	7	SFF	3	{-0.589, -0.947, 3.897}	0.66	1.92
decane(1)+tetracosane(2)	WW2005QUE1 = Queimada et al. (2005)	333.15	7	EBE	1	{0.477}	1.01	2.23
decane(1)+tetracosane(2)	WW2005QUE1 = Queimada et al. (2005)	333.15	7	WSD	1	{1.113}	0.8	2.23
decane(1)+tetracosane(2)	WW2005QUE1 = Queimada et al. (2005)	333.15	7	JOAC1	1	{0.243}	0.85	2.23
decane(1)+tetracosane(2)	WW2005QUE1 = Queimada et al. (2005)	333.15	7	BCRG	1	{0.22}	1.11	2.23
decane(1)+tetracosane(2)	WW2005QUE1 = Queimada et al. (2005)	333.15	7	CW	2	{0.157, 0.704}	0.8	2.23
decane(1)+tetracosane(2)	WW2005QUE1 = Queimada et al. (2005)	333.15	7	RK2	2	{4.79, -0.431}	0.8	2.23
decane(1)+tetracosane(2)	WW2005QUE1 = Queimada et al. (2005)	333.15	7	JOAC2	2	{0.237, 0.055}	0.82	2.23
decane(1)+tetracosane(2)	WW2005QUE1 = Queimada et al. (2005)	333.15	7	FLW	2	{1.014, 0.822}	0.89	2.23
decane(1)+tetracosane(2)	WW2005QUE1 = Queimada et al. (2005)	333.15	7	QYDH	2	{0.543, 1.281}	0.79	2.23
decane(1)+tetracosane(2)	WW2005QUE1 = Queimada et al. (2005)	333.15	7	SIGMO	2	{4.41, 1.712}	0.81	2.23
decane(1)+tetracosane(2)	WW2005QUE1 = Queimada et al. (2005)	333.15	7	RK3	3	{4.808, 1.48, 3.133}	0.68	2.23
decane(1)+tetracosane(2)	WW2005QUE1 = Queimada et al. (2005)	333.15	7	JOAC3	3	{0.238, -0.025, 0.131}	0.67	2.23
decane(1)+tetracosane(2)	WW2005QUE1 = Queimada et al. (2005)	333.15	7	SFF	3	{-0.731, -0.101, 1.618}	0.79	2.23
decane(1)+tetracosane(2)	WW2005QUE1 = Queimada et al. (2005)	343.15	7	EBE	1	{0.505}	0.75	1.92
decane(1)+tetracosane(2)	WW2005QUE1 = Queimada et al. (2005)	343.15	7	WSD	1	{1.112}	0.85	1.92
decane(1)+tetracosane(2)	WW2005QUE1 = Queimada et al. (2005)	343.15	7	JOAC1	1	{0.245}	0.9	1.92
decane(1)+tetracosane(2)	WW2005QUE1 = Queimada et al. (2005)	343.15	7	BCRG	1	{0.25}	0.82	1.92
decane(1)+tetracosane(2)	WW2005QUE1 = Queimada et al. (2005)	343.15	7	CW	2	{0.5, 0.492}	0.75	1.92
decane(1)+tetracosane(2)	WW2005QUE1 = Queimada et al. (2005)	343.15	7	RK2	2	{4.27, -1.69}	0.77	1.92
decane(1)+tetracosane(2)	WW2005QUE1 = Queimada et al. (2005)	343.15	7	JOAC2	2	{0.227, 0.099}	0.8	1.92
decane(1)+tetracosane(2)	WW2005QUE1 = Queimada et al. (2005)	343.15	7	FLW	2	{2.044, 0.49}	0.85	1.92
decane(1)+tetracosane(2)	WW2005QUE1 = Queimada et al. (2005)	343.15	7	QYDH	2	{0.506, 1.01}	0.75	1.92
decane(1)+tetracosane(2)	WW2005QUE1 = Queimada et al. (2005)	343.15	7	SIGMO	2	{5.153, 1.645}	0.86	1.92
decane(1)+tetracosane(2)	WW2005QUE1 = Queimada et al. (2005)	343.15	7	RK3	3	{4.291, 0.384, 3.418}	0.65	1.92
decane(1)+tetracosane(2)	WW2005QUE1 = Queimada et al. (2005)	343.15	7	JOAC3	3	{0.228, 0.021, 0.154}	0.64	1.92
decane(1)+tetracosane(2)	WW2005QUE1 = Queimada et al. (2005)	343.15	7	SFF	3	{-0.613, -0.406, 3.036}	0.73	1.92
heptane(1)+hexadecane(2)	WW2002ROL1 = Rolo et al. (2002)	293.15	5	EBE	1	{0.605}	0.92	2.05
heptane(1)+hexadecane(2)	WW2002ROL1 = Rolo et al. (2002)	293.15	5	WSD	1	{1.102}	0.92	2.05
heptane(1)+hexadecane(2)	WW2002ROL1 = Rolo et al. (2002)	293.15	5	JOAC1	1	{0.222}	0.93	2.05
heptane(1)+hexadecane(2)	WW2002ROL1 = Rolo et al. (2002)	293.15	5	BCRG	1	{0.368}	0.94	2.05
heptane(1)+hexadecane(2)	WW2002ROL1 = Rolo et al. (2002)	293.15	5	CW	2	{-0.188, 0.665}	0.9	2.05
heptane(1)+hexadecane(2)	WW2002ROL1 = Rolo et al. (2002)	293.15	5	RK2	2	{4.464, 0.384}	0.91	2.05
heptane(1)+hexadecane(2)	WW2002ROL1 = Rolo et al. (2002)	293.15	5	JOAC2	2	{0.233, 0.017}	0.92	2.05
heptane(1)+hexadecane(2)	WW2002ROL1 = Rolo et al. (2002)	293.15	5	FLW	2	{2.033, 0.508}	1.03	2.05
heptane(1)+hexadecane(2)	WW2002ROL1 = Rolo et al. (2002)	293.15	5	QYDH	2	{0.639, 1.243}	0.89	2.05
heptane(1)+hexadecane(2)	WW2002ROL1 = Rolo et al. (2002)	293.15	5	SIGMO	2	{5.433, 1.446}	0.9	2.05
heptane(1)+hexadecane(2)	WW2002ROL1 = Rolo et al. (2002)	293.15	5	RK3	3	{3.517, 0.384, 2.63}	0.71	2.05
heptane(1)+hexadecane(2)	WW2002ROL1 = Rolo et al. (2002)	293.15	5	JOAC3	3	{0.192, 0.017, 0.112}	0.72	2.05
heptane(1)+hexadecane(2)	WW2002ROL1 = Rolo et al. (2002)	293.15	5	SFF	3	{-1.071, 0.504, 0.098}	0.89	2.05
heptane(1)+hexadecane(2)	WW2011MOH3 = Mohsen-Nia (2011)	293.15	9	EBE	1	{0.687}	0.72	4.28
heptane(1)+hexadecane(2)	WW2011MOH3 = Mohsen-Nia (2011)	293.15	9	WSD	1	{1.069}	0.67	4.28
heptane(1)+hexadecane(2)	WW2011MOH3 = Mohsen-Nia (2011)	293.15	9	JOAC1	1	{0.163}	0.66	4.28
heptane(1)+hexadecane(2)	WW2011MOH3 = Mohsen-Nia (2011)	293.15	9	BCRG	1	{0.456}	0.76	4.28
heptane(1)+hexadecane(2)	WW2011MOH3 = Mohsen-Nia (2011)	293.15	9	CW	2	{-0.079, 0.382}	0.66	4.28
heptane(1)+hexadecane(2)	WW2011MOH3 = Mohsen-Nia (2011)	293.15	9	RK2	2	{2.788, 0.568}	0.66	4.28
heptane(1)+hexadecane(2)	WW2011MOH3 = Mohsen-Nia (2011)	293.15	9	JOAC2	2	{0.158, 0.023}	0.65	4.28
heptane(1)+hexadecane(2)	WW2011MOH3 = Mohsen-Nia (2011)	293.15	9	FLW	2	{0.795, 1.064}	0.55	4.28
heptane(1)+hexadecane(2)	WW2011MOH3 = Mohsen-Nia (2011)	293.15	9	QYDH	2	{0.72, 1.053}	0.68	4.28
heptane(1)+hexadecane(2)	WW2011MOH3 = Mohsen-Nia (2011)	293.15	9	SIGMO	2	{5.361, 1.296}	0.7	4.28
heptane(1)+hexadecane(2)	WW2011MOH3 = Mohsen-Nia (2011)	293.15	9	RK3	3	{2.872, 0.561, -2.123}	0.5	4.28
heptane(1)+hexadecane(2)	WW2011MOH3 = Mohsen-Nia (2011)	293.15	9	JOAC3	3	{0.166, -0.001, -0.091}	0.51	4.28
heptane(1)+hexadecane(2)	WW2011MOH3 = Mohsen-Nia (2011)	293.15	9	SFF	3	{-0.401, 0.412, 4.755}	0.56	4.28
heptane(1)+hexadecane(2)	WW58K1 = Koefoed and Villadsen (1958)	293.35	6	EBE	1	{0.741}	0.26	0.51
heptane(1)+hexadecane(2)	WW58K1 = Koefoed and Villadsen (1958)	293.35	6	WSD	1	{1.058}	0.32	0.51
heptane(1)+hexadecane(2)	WW58K1 = Koefoed and Villadsen (1958)	293.35	6	JOAC1	1	{0.139}	0.41	0.57
heptane(1)+hexadecane(2)	WW58K1 = Koefoed and Villadsen (1958)	293.35	6	BCRG	1	{0.547}	0.23	0.51
heptane(1)+hexadecane(2)	WW58K1 = Koefoed and Villadsen (1958)	293.35	6	CW	2	{0.482, 0.225}	0.19	0.51
heptane(1)+hexadecane(2)	WW58K1 = Koefoed and Villadsen (1958)	293.35	6	RK2	2	{2.157, -0.886}	0.17	0.51
heptane(1)+hexadecane(2)	WW58K1 = Koefoed and Villadsen (1958)	293.35	6	JOAC2	2	{0.139, 0.054}	0.18	0.51
heptane(1)+hexadecane(2)	WW58K1 = Koefoed and Villadsen (1958)	293.35	6	FLW	2	{1.268, 0.772}	0.36	0.62
heptane(1)+hexadecane(2)	WW58K1 = Koefoed and Villadsen (1958)	293.35	6	QYDH	2	{0.708, 0.933}	0.17	0.51
heptane(1)+hexadecane(2)	WW58K1 = Koefoed and Villadsen (1958)	293.35	6	SIGMO	2	{6.781, 1.234}	0.45	0.75
heptane(1)+hexadecane(2)	WW58K1 = Koefoed and Villadsen (1958)	293.35	6	RK3	3	{2.172, -0.888, -0.044}	0.17	0.51
heptane(1)+hexadecane(2)	WW58K1 = Koefoed and Villadsen (1958)	293.35	6	JOAC3	3	{0.138, 0.056, 0.007}	0.17	0.51
heptane(1)+hexadecane(2)	WW58K1 = Koefoed and Villadsen (1958)	293.35	6	SFF	3	{-0.155, -0.251, 0.825}	0.17	0.51
heptane(1)+hexadecane(2)	WW2011MOH3 = Mohsen-Nia (2011)	298.15	9	EBE	1	{0.709}	0.31	0.97
heptane(1)+hexadecane(2)	WW2011MOH3 = Mohsen-Nia (2011)	298.15	9	WSD	1	{1.068}	0.26	0.81
heptane(1)+hexadecane(2)	WW2011MOH3 = Mohsen-Nia (2011)	298.15	9	JOAC1	1	{0.163}	0.26	0.66
heptane(1)+hexadecane(2)	WW2011MOH3 = Mohsen-Nia (2011)	298.15	9	BCRG	1	{0.488}	0.34	1.1
heptane(1)+hexadecane(2)	WW2011MOH3 = Mohsen-Nia (2011)	298.15	9	CW	2	{-0.084, 0.364}	0.26	0.79
heptane(1)+hexadecane(2)	WW2011MOH3 = Mohsen-Nia (2011)	298.15	9	RK2	2	{2.667, 0.526}	0.26	0.67
heptane(1)+hexadecane(2)	WW2011MOH3 = Mohsen-Nia (2011)	298.15	9	JOAC2	2	{0.158, 0.025}	0.25	0.79
heptane(1)+hexadecane(2)	WW2011MOH3 = Mohsen-Nia (2011)	298.15	9	FLW	2	{0.788, 1.074}	0.15	0.44
heptane(1)+hexadecane(2)	WW2011MOH3 = Mohsen-Nia (2011)	298.15	9	QYDH	2	{0.729, 1.042}	0.27	0.87
heptane(1)+hexadecane(2)	WW2011MOH3 = Mohsen-Nia (2011)	298.15	9	SIGMO	2	{5.627, 1.278}	0.3	0.65
heptane(1)+hexadecane(2)	WW2011MOH3 = Mohsen-Nia (2011)	298.15	9	RK3	3	{2.769, 0.526, -2.556}	0.08	0.44
heptane(1)+hexadecane(2)	WW2011MOH3 = Mohsen-Nia (2011)	298.15	9	JOAC3	3	{0.167, 0.001, -0.107}	0.1	0.44
heptane(1)+hexadecane(2)	WW2011MOH3 = Mohsen-Nia (2011)	298.15	9	SFF	3	{-0.378, 0.496, 5.361}	0.14	0.44
heptane(1)+hexadecane(2)	WW58K1 = Koefoed and Villadsen (1958)	303.05	6	EBE	1	{0.74}	0.17	0.43
heptane(1)+hexadecane(2)	WW58K1 = Koefoed and Villadsen (1958)	303.05	6	WSD	1	{1.065}	0.13	0.43
heptane(1)+hexadecane(2)	WW58K1 = Koefoed and Villadsen (1958)	303.05	6	JOAC1	1	{0.15}	0.23	0.43
heptane(1)+hexadecane(2)	WW58K1 = Koefoed and Villadsen (1958)	303.05	6	BCRG	1	{0.545}	0.19	0.43
heptane(1)+hexadecane(2)	WW58K1 = Koefoed and Villadsen (1958)	303.05	6	CW	2	{0.012, 0.31}	0.13	0.43
heptane(1)+hexadecane(2)	WW58K1 = Koefoed and Villadsen (1958)	303.05	6	RK2	2	{2.33, -0.014}	0.13	0.43
heptane(1)+hexadecane(2)	WW58K1 = Koefoed and Villadsen (1958)	303.05	6	JOAC2	2	{0.155, 0.023}	0.14	0.43
heptane(1)+hexadecane(2)	WW58K1 = Koefoed and Villadsen (1958)	303.05	6	FLW	2	{1.44, 0.693}	0.25	0.53
heptane(1)+hexadecane(2)	WW58K1 = Koefoed and Villadsen (1958)	303.05	6	QYDH	2	{0.757, 1.043}	0.12	0.43
heptane(1)+hexadecane(2)	WW58K1 = Koefoed and Villadsen (1958)	303.05	6	SIGMO	2	{6.417, 1.236}	0.27	0.43
heptane(1)+hexadecane(2)	WW58K1 = Koefoed and Villadsen (1958)	303.05	6	RK3	3	{2.239, -0.003, 0.263}	0.11	0.43
heptane(1)+hexadecane(2)	WW58K1 = Koefoed and Villadsen (1958)	303.05	6	JOAC3	3	{0.15, 0.022, 0.016}	0.11	0.43
heptane(1)+hexadecane(2)	WW58K1 = Koefoed and Villadsen (1958)	303.05	6	SFF	3	{-0.292, -0.034, 2.134}	0.13	0.43
heptane(1)+hexadecane(2)	WW2002ROL1 = Rolo et al. (2002)	303.15	5	EBE	1	{0.59}	0.78	1.4
heptane(1)+hexadecane(2)	WW2002ROL1 = Rolo et al. (2002)	303.15	5	WSD	1	{1.109}	0.8	1.4
heptane(1)+hexadecane(2)	WW2002ROL1 = Rolo et al. (2002)	303.15	5	JOAC1	1	{0.219}	0.84	1.4
heptane(1)+hexadecane(2)	WW2002ROL1 = Rolo et al. (2002)	303.15	5	BCRG	1	{0.36}	0.77	1.4
heptane(1)+hexadecane(2)	WW2002ROL1 = Rolo et al. (2002)	303.15	5	CW	2	{0.625, 0.305}	0.76	1.4
heptane(1)+hexadecane(2)	WW2002ROL1 = Rolo et al. (2002)	303.15	5	RK2	2	{4.432, -0.212}	0.78	1.4
heptane(1)+hexadecane(2)	WW2002ROL1 = Rolo et al. (2002)	303.15	5	JOAC2	2	{0.246, 0.046}	0.81	1.4
heptane(1)+hexadecane(2)	WW2002ROL1 = Rolo et al. (2002)	303.15	5	FLW	2	{2.077, 0.498}	0.9	1.4
heptane(1)+hexadecane(2)	WW2002ROL1 = Rolo et al. (2002)	303.15	5	QYDH	2	{0.609, 1.144}	0.76	1.4
heptane(1)+hexadecane(2)	WW2002ROL1 = Rolo et al. (2002)	303.15	5	SIGMO	2	{5.366, 1.384}	0.81	1.4
heptane(1)+hexadecane(2)	WW2002ROL1 = Rolo et al. (2002)	303.15	5	RK3	3	{3.316, -0.212, 3.098}	0.55	1.4
heptane(1)+hexadecane(2)	WW2002ROL1 = Rolo et al. (2002)	303.15	5	JOAC3	3	{0.196, 0.046, 0.141}	0.55	1.4
heptane(1)+hexadecane(2)	WW2002ROL1 = Rolo et al. (2002)	303.15	5	SFF	3	{-0.441, -1.116, 8.432}	0.68	1.4
heptane(1)+hexadecane(2)	WW2011MOH3 = Mohsen-Nia (2011)	305.15	9	EBE	1	{0.717}	0.28	0.88
heptane(1)+hexadecane(2)	WW2011MOH3 = Mohsen-Nia (2011)	305.15	9	WSD	1	{1.071}	0.27	0.75
heptane(1)+hexadecane(2)	WW2011MOH3 = Mohsen-Nia (2011)	305.15	9	JOAC1	1	{0.168}	0.26	0.55
heptane(1)+hexadecane(2)	WW2011MOH3 = Mohsen-Nia (2011)	305.15	9	BCRG	1	{0.515}	0.31	0.93
heptane(1)+hexadecane(2)	WW2011MOH3 = Mohsen-Nia (2011)	305.15	9	CW	2	{-0.09, 0.36}	0.27	0.72
heptane(1)+hexadecane(2)	WW2011MOH3 = Mohsen-Nia (2011)	305.15	9	RK2	2	{2.642, 0.426}	0.26	0.63
heptane(1)+hexadecane(2)	WW2011MOH3 = Mohsen-Nia (2011)	305.15	9	JOAC2	2	{0.164, 0.033}	0.26	0.76
heptane(1)+hexadecane(2)	WW2011MOH3 = Mohsen-Nia (2011)	305.15	9	FLW	2	{0.841, 1.021}	0.14	0.47
heptane(1)+hexadecane(2)	WW2011MOH3 = Mohsen-Nia (2011)	305.15	9	QYDH	2	{0.724, 1.019}	0.28	0.84
heptane(1)+hexadecane(2)	WW2011MOH3 = Mohsen-Nia (2011)	305.15	9	SIGMO	2	{5.244, 1.269}	0.3	0.72
heptane(1)+hexadecane(2)	WW2011MOH3 = Mohsen-Nia (2011)	305.15	9	RK3	3	{2.735, 0.426, -2.311}	0.08	0.47
heptane(1)+hexadecane(2)	WW2011MOH3 = Mohsen-Nia (2011)	305.15	9	JOAC3	3	{0.174, 0.005, -0.111}	0.08	0.47
heptane(1)+hexadecane(2)	WW2011MOH3 = Mohsen-Nia (2011)	305.15	9	SFF	3	{-0.366, 0.44, 5.588}	0.15	0.47
heptane(1)+hexadecane(2)	WW2002ROL1 = Rolo et al. (2002)	313.15	5	EBE	1	{0.548}	1.08	1.63
heptane(1)+hexadecane(2)	WW2002ROL1 = Rolo et al. (2002)	313.15	5	WSD	1	{1.139}	1.08	1.84
heptane(1)+hexadecane(2)	WW2002ROL1 = Rolo et al. (2002)	313.15	5	JOAC1	1	{0.301}	1.11	1.94
heptane(1)+hexadecane(2)	WW2002ROL1 = Rolo et al. (2002)	313.15	5	BCRG	1	{0.313}	1.06	1.64
heptane(1)+hexadecane(2)	WW2002ROL1 = Rolo et al. (2002)	313.15	5	CW	2	{0.691, 0.317}	1.03	2.06
heptane(1)+hexadecane(2)	WW2002ROL1 = Rolo et al. (2002)	313.15	5	RK2	2	{5.724, 0.554}	1.07	2.22
heptane(1)+hexadecane(2)	WW2002ROL1 = Rolo et al. (2002)	313.15	5	JOAC2	2	{0.317, 0.026}	1.09	2.34
heptane(1)+hexadecane(2)	WW2002ROL1 = Rolo et al. (2002)	313.15	5	FLW	2	{2.222, 0.465}	1.2	1.63
heptane(1)+hexadecane(2)	WW2002ROL1 = Rolo et al. (2002)	313.15	5	QYDH	2	{0.576, 1.228}	1.06	1.63
heptane(1)+hexadecane(2)	WW2002ROL1 = Rolo et al. (2002)	313.15	5	SIGMO	2	{4.687, 1.63}	1.06	1.85
heptane(1)+hexadecane(2)	WW2002ROL1 = Rolo et al. (2002)	313.15	5	RK3	3	{3.684, 0.554, 5.669}	0.62	1.63
heptane(1)+hexadecane(2)	WW2002ROL1 = Rolo et al. (2002)	313.15	5	JOAC3	3	{0.224, 0.026, 0.256}	0.63	1.63
heptane(1)+hexadecane(2)	WW2002ROL1 = Rolo et al. (2002)	313.15	5	SFF	3	{-0.922, 0.267, 0.468}	1.06	2.03
heptane(1)+hexadecane(2)	WW2011MOH3 = Mohsen-Nia (2011)	318.15	9	EBE	1	{0.737}	0.31	0.97
heptane(1)+hexadecane(2)	WW2011MOH3 = Mohsen-Nia (2011)	318.15	9	WSD	1	{1.073}	0.3	0.85
heptane(1)+hexadecane(2)	WW2011MOH3 = Mohsen-Nia (2011)	318.15	9	JOAC1	1	{0.173}	0.28	0.6
heptane(1)+hexadecane(2)	WW2011MOH3 = Mohsen-Nia (2011)	318.15	9	BCRG	1	{0.543}	0.32	1.02
heptane(1)+hexadecane(2)	WW2011MOH3 = Mohsen-Nia (2011)	318.15	9	CW	2	{-0.105, 0.332}	0.3	0.81
heptane(1)+hexadecane(2)	WW2011MOH3 = Mohsen-Nia (2011)	318.15	9	RK2	2	{2.453, 0.261}	0.28	0.77
heptane(1)+hexadecane(2)	WW2011MOH3 = Mohsen-Nia (2011)	318.15	9	JOAC2	2	{0.172, 0.039}	0.28	0.88
heptane(1)+hexadecane(2)	WW2011MOH3 = Mohsen-Nia (2011)	318.15	9	FLW	2	{0.874, 0.992}	0.16	0.49
heptane(1)+hexadecane(2)	WW2011MOH3 = Mohsen-Nia (2011)	318.15	9	QYDH	2	{0.738, 1.003}	0.31	0.96
heptane(1)+hexadecane(2)	WW2011MOH3 = Mohsen-Nia (2011)	318.15	9	SIGMO	2	{6.092, 1.238}	0.34	0.75
heptane(1)+hexadecane(2)	WW2011MOH3 = Mohsen-Nia (2011)	318.15	9	RK3	3	{2.559, 0.261, -2.656}	0.09	0.48
heptane(1)+hexadecane(2)	WW2011MOH3 = Mohsen-Nia (2011)	318.15	9	JOAC3	3	{0.183, 0.012, -0.135}	0.09	0.48
heptane(1)+hexadecane(2)	WW2011MOH3 = Mohsen-Nia (2011)	318.15	9	SFF	3	{-0.328, 0.467, 6.19}	0.17	0.48
heptane(1)+hexadecane(2)	WW2002ROL1 = Rolo et al. (2002)	323.15	5	EBE	1	{0.535}	1.13	2.27
heptane(1)+hexadecane(2)	WW2002ROL1 = Rolo et al. (2002)	323.15	5	WSD	1	{1.155}	1.14	2.2
heptane(1)+hexadecane(2)	WW2002ROL1 = Rolo et al. (2002)	323.15	5	JOAC1	1	{0.372}	1.13	3.27
heptane(1)+hexadecane(2)	WW2002ROL1 = Rolo et al. (2002)	323.15	5	BCRG	1	{0.299}	1.11	2.48
heptane(1)+hexadecane(2)	WW2002ROL1 = Rolo et al. (2002)	323.15	5	CW	2	{0.725, 0.311}	1.07	3.01
heptane(1)+hexadecane(2)	WW2002ROL1 = Rolo et al. (2002)	323.15	5	RK2	2	{6.59, 1.43}	1.11	3.19
heptane(1)+hexadecane(2)	WW2002ROL1 = Rolo et al. (2002)	323.15	5	JOAC2	2	{0.373, -0.002}	1.13	3.29
heptane(1)+hexadecane(2)	WW2002ROL1 = Rolo et al. (2002)	323.15	5	FLW	2	{2.263, 0.457}	1.26	2.21
heptane(1)+hexadecane(2)	WW2002ROL1 = Rolo et al. (2002)	323.15	5	QYDH	2	{0.56, 1.202}	1.12	1.78
heptane(1)+hexadecane(2)	WW2002ROL1 = Rolo et al. (2002)	323.15	5	SIGMO	2	{3.546, 1.718}	1.1	2.6
heptane(1)+hexadecane(2)	WW2002ROL1 = Rolo et al. (2002)	323.15	5	RK3	3	{3.777, 1.43, 7.812}	0.47	1.24
heptane(1)+hexadecane(2)	WW2002ROL1 = Rolo et al. (2002)	323.15	5	JOAC3	3	{0.243, -0.002, 0.359}	0.48	1.24
heptane(1)+hexadecane(2)	WW2002ROL1 = Rolo et al. (2002)	323.15	5	SFF	3	{-1.34, 0.646, 0.333}	1.07	2.98
heptane(1)+hexadecane(2)	WW2011MOH3 = Mohsen-Nia (2011)	323.15	9	EBE	1	{0.749}	0.34	0.97
heptane(1)+hexadecane(2)	WW2011MOH3 = Mohsen-Nia (2011)	323.15	9	WSD	1	{1.072}	0.33	0.85
heptane(1)+hexadecane(2)	WW2011MOH3 = Mohsen-Nia (2011)	323.15	9	JOAC1	1	{0.176}	0.33	0.67
heptane(1)+hexadecane(2)	WW2011MOH3 = Mohsen-Nia (2011)	323.15	9	BCRG	1	{0.562}	0.35	1.01
heptane(1)+hexadecane(2)	WW2011MOH3 = Mohsen-Nia (2011)	323.15	9	CW	2	{-0.109, 0.315}	0.33	0.82
heptane(1)+hexadecane(2)	WW2011MOH3 = Mohsen-Nia (2011)	323.15	9	RK2	2	{2.351, 0.328}	0.33	0.76
heptane(1)+hexadecane(2)	WW2011MOH3 = Mohsen-Nia (2011)	323.15	9	JOAC2	2	{0.173, 0.042}	0.32	0.9
heptane(1)+hexadecane(2)	WW2011MOH3 = Mohsen-Nia (2011)	323.15	9	FLW	2	{0.869, 0.997}	0.19	0.67
heptane(1)+hexadecane(2)	WW2011MOH3 = Mohsen-Nia (2011)	323.15	9	QYDH	2	{0.747, 0.995}	0.34	0.98
heptane(1)+hexadecane(2)	WW2011MOH3 = Mohsen-Nia (2011)	323.15	9	SIGMO	2	{6.181, 1.226}	0.37	0.85
heptane(1)+hexadecane(2)	WW2011MOH3 = Mohsen-Nia (2011)	323.15	9	RK3	3	{2.447, 0.292, -2.568}	0.1	0.67
heptane(1)+hexadecane(2)	WW2011MOH3 = Mohsen-Nia (2011)	323.15	9	JOAC3	3	{0.184, 0.013, -0.136}	0.11	0.67
heptane(1)+hexadecane(2)	WW2011MOH3 = Mohsen-Nia (2011)	323.15	9	SFF	3	{-0.344, 0.215, 2.074}	0.28	0.67
heptane(1)+hexadecane(2)	WW2002ROL1 = Rolo et al. (2002)	333.15	5	EBE	1	{0.464}	1.2	1.97
heptane(1)+hexadecane(2)	WW2002ROL1 = Rolo et al. (2002)	333.15	5	WSD	1	{1.206}	1.22	3.51
heptane(1)+hexadecane(2)	WW2002ROL1 = Rolo et al. (2002)	333.15	5	JOAC1	1	{0.403}	1.32	2.88
heptane(1)+hexadecane(2)	WW2002ROL1 = Rolo et al. (2002)	333.15	5	BCRG	1	{0.227}	1.17	2.29
heptane(1)+hexadecane(2)	WW2002ROL1 = Rolo et al. (2002)	333.15	5	CW	2	{0.806, 0.333}	1.09	3.05
heptane(1)+hexadecane(2)	WW2002ROL1 = Rolo et al. (2002)	333.15	5	RK2	2	{7.527, 0.231}	1.22	3.67
heptane(1)+hexadecane(2)	WW2002ROL1 = Rolo et al. (2002)	333.15	5	JOAC2	2	{0.444, 0.069}	1.27	3.94
heptane(1)+hexadecane(2)	WW2002ROL1 = Rolo et al. (2002)	333.15	5	FLW	2	{2.606, 0.398}	1.32	2.24
heptane(1)+hexadecane(2)	WW2002ROL1 = Rolo et al. (2002)	333.15	5	QYDH	2	{0.478, 1.136}	1.19	2.12
heptane(1)+hexadecane(2)	WW2002ROL1 = Rolo et al. (2002)	333.15	5	SIGMO	2	{3.796, 1.931}	1.21	3.63
heptane(1)+hexadecane(2)	WW2002ROL1 = Rolo et al. (2002)	333.15	5	RK3	3	{4.397, 0.231, 8.693}	0.48	1.38
heptane(1)+hexadecane(2)	WW2002ROL1 = Rolo et al. (2002)	333.15	5	JOAC3	3	{0.289, 0.069, 0.429}	0.48	1.38
heptane(1)+hexadecane(2)	WW2002ROL1 = Rolo et al. (2002)	333.15	5	SFF	3	{-0.547, -0.746, 2.893}	1.09	2.23
heptane(1)+docosane(2)	WW2003QUE1 = Queimada et al. (2003)	323.15	5	EBE	1	{0.555}	0.68	1.69
heptane(1)+docosane(2)	WW2003QUE1 = Queimada et al. (2003)	323.15	5	WSD	1	{1.154}	0.64	1.69
heptane(1)+docosane(2)	WW2003QUE1 = Queimada et al. (2003)	323.15	5	JOAC1	1	{0.343}	0.9	1.69
heptane(1)+docosane(2)	WW2003QUE1 = Queimada et al. (2003)	323.15	5	BCRG	1	{0.298}	0.77	1.69
heptane(1)+docosane(2)	WW2003QUE1 = Queimada et al. (2003)	323.15	5	CW	2	{0.21, 0.526}	0.56	1.69
heptane(1)+docosane(2)	WW2003QUE1 = Queimada et al. (2003)	323.15	5	RK2	2	{5.729, -0.674}	0.56	1.69
heptane(1)+docosane(2)	WW2003QUE1 = Queimada et al. (2003)	323.15	5	JOAC2	2	{0.357, 0.099}	0.6	1.69
heptane(1)+docosane(2)	WW2003QUE1 = Queimada et al. (2003)	323.15	5	FLW	2	{2.478, 0.449}	0.67	1.69
heptane(1)+docosane(2)	WW2003QUE1 = Queimada et al. (2003)	323.15	5	QYDH	2	{0.592, 1.104}	0.54	1.69
heptane(1)+docosane(2)	WW2003QUE1 = Queimada et al. (2003)	323.15	5	SIGMO	2	{5.378, 1.486}	0.85	1.69
heptane(1)+docosane(2)	WW2003QUE1 = Queimada et al. (2003)	323.15	5	RK3	3	{5.557, -0.674, 0.689}	0.53	1.69
heptane(1)+docosane(2)	WW2003QUE1 = Queimada et al. (2003)	323.15	5	JOAC3	3	{0.343, 0.099, 0.057}	0.53	1.69
heptane(1)+docosane(2)	WW2003QUE1 = Queimada et al. (2003)	323.15	5	SFF	3	{-0.553, -0.182, 3.262}	0.53	1.69
heptane(1)+docosane(2)	WW2003QUE1 = Queimada et al. (2003)	333.15	5	EBE	1	{0.54}	0.67	1.38
heptane(1)+docosane(2)	WW2003QUE1 = Queimada et al. (2003)	333.15	5	WSD	1	{1.181}	0.62	1.38
heptane(1)+docosane(2)	WW2003QUE1 = Queimada et al. (2003)	333.15	5	JOAC1	1	{0.384}	0.86	1.62
heptane(1)+docosane(2)	WW2003QUE1 = Queimada et al. (2003)	333.15	5	BCRG	1	{0.28}	0.78	1.38
heptane(1)+docosane(2)	WW2003QUE1 = Queimada et al. (2003)	333.15	5	CW	2	{0.137, 0.609}	0.57	1.38
heptane(1)+docosane(2)	WW2003QUE1 = Queimada et al. (2003)	333.15	5	RK2	2	{6.519, -0.48}	0.57	1.38
heptane(1)+docosane(2)	WW2003QUE1 = Queimada et al. (2003)	333.15	5	JOAC2	2	{0.417, 0.108}	0.63	1.38
heptane(1)+docosane(2)	WW2003QUE1 = Queimada et al. (2003)	333.15	5	FLW	2	{0.91, 0.809}	0.71	1.38
heptane(1)+docosane(2)	WW2003QUE1 = Queimada et al. (2003)	333.15	5	QYDH	2	{0.578, 1.172}	0.56	1.38
heptane(1)+docosane(2)	WW2003QUE1 = Queimada et al. (2003)	333.15	5	SIGMO	2	{6.496, 1.512}	0.77	1.38
heptane(1)+docosane(2)	WW2003QUE1 = Queimada et al. (2003)	333.15	5	RK3	3	{5.949, -0.48, 2.279}	0.46	1.38
heptane(1)+docosane(2)	WW2003QUE1 = Queimada et al. (2003)	333.15	5	JOAC3	3	{0.384, 0.108, 0.134}	0.46	1.38
heptane(1)+docosane(2)	WW2003QUE1 = Queimada et al. (2003)	333.15	5	SFF	3	{-0.63, -0.145, 4.132}	0.55	1.38
heptane(1)+docosane(2)	WW2003QUE1 = Queimada et al. (2003)	343.15	5	EBE	1	{0.521}	0.6	1.11
heptane(1)+docosane(2)	WW2003QUE1 = Queimada et al. (2003)	343.15	5	WSD	1	{1.207}	0.35	1.08
heptane(1)+docosane(2)	WW2003QUE1 = Queimada et al. (2003)	343.15	5	JOAC1	1	{0.432}	0.59	1.5
heptane(1)+docosane(2)	WW2003QUE1 = Queimada et al. (2003)	343.15	5	BCRG	1	{0.258}	0.73	1.25
heptane(1)+docosane(2)	WW2003QUE1 = Queimada et al. (2003)	343.15	5	CW	2	{-0.031, 0.689}	0.34	1.08
heptane(1)+docosane(2)	WW2003QUE1 = Queimada et al. (2003)	343.15	5	RK2	2	{6.924, 0.104}	0.34	1.08
heptane(1)+docosane(2)	WW2003QUE1 = Queimada et al. (2003)	343.15	5	JOAC2	2	{0.463, 0.098}	0.38	1.08
heptane(1)+docosane(2)	WW2003QUE1 = Queimada et al. (2003)	343.15	5	FLW	2	{1.482, 0.609}	0.51	1.35
heptane(1)+docosane(2)	WW2003QUE1 = Queimada et al. (2003)	343.15	5	QYDH	2	{0.595, 1.258}	0.32	1.08
heptane(1)+docosane(2)	WW2003QUE1 = Queimada et al. (2003)	343.15	5	SIGMO	2	{5.495, 1.546}	0.45	1.08
heptane(1)+docosane(2)	WW2003QUE1 = Queimada et al. (2003)	343.15	5	RK3	3	{6.433, 0.104, 1.964}	0.23	1.08
heptane(1)+docosane(2)	WW2003QUE1 = Queimada et al. (2003)	343.15	5	JOAC3	3	{0.432, 0.098, 0.125}	0.23	1.08
heptane(1)+docosane(2)	WW2003QUE1 = Queimada et al. (2003)	343.15	5	SFF	3	{-0.687, 0.019, 1.449}	0.34	1.08
heptane(1)+tetracosane(2)	WW2003QUE1 = Queimada et al. (2003)	323.15	5	EBE	1	{0.522}	1.07	1.84
heptane(1)+tetracosane(2)	WW2003QUE1 = Queimada et al. (2003)	323.15	5	WSD	1	{1.17}	0.75	1.84
heptane(1)+tetracosane(2)	WW2003QUE1 = Queimada et al. (2003)	323.15	5	JOAC1	1	{0.381}	0.69	1.84
heptane(1)+tetracosane(2)	WW2003QUE1 = Queimada et al. (2003)	323.15	5	BCRG	1	{0.26}	1.19	1.84
heptane(1)+tetracosane(2)	WW2003QUE1 = Queimada et al. (2003)	323.15	5	CW	2	{-0.46, 0.815}	0.63	1.84
heptane(1)+tetracosane(2)	WW2003QUE1 = Queimada et al. (2003)	323.15	5	RK2	2	{6.628, 1.238}	0.64	1.84
heptane(1)+tetracosane(2)	WW2003QUE1 = Queimada et al. (2003)	323.15	5	JOAC2	2	{0.394, 0.026}	0.66	1.84
heptane(1)+tetracosane(2)	WW2003QUE1 = Queimada et al. (2003)	323.15	5	FLW	2	{0.67, 0.987}	0.76	1.84
heptane(1)+tetracosane(2)	WW2003QUE1 = Queimada et al. (2003)	323.15	5	QYDH	2	{0.652, 1.385}	0.64	1.84
heptane(1)+tetracosane(2)	WW2003QUE1 = Queimada et al. (2003)	323.15	5	SIGMO	2	{1.581, 1.575}	0.61	1.84
heptane(1)+tetracosane(2)	WW2003QUE1 = Queimada et al. (2003)	323.15	5	RK3	3	{6.231, 1.238, 1.588}	0.56	1.84
heptane(1)+tetracosane(2)	WW2003QUE1 = Queimada et al. (2003)	323.15	5	JOAC3	3	{0.374, 0.026, 0.082}	0.56	1.84
heptane(1)+tetracosane(2)	WW2003QUE1 = Queimada et al. (2003)	323.15	5	SFF	3	{-0.812, 0.289, 0.913}	0.65	1.84
heptane(1)+tetracosane(2)	WW2003QUE1 = Queimada et al. (2003)	333.15	5	EBE	1	{0.475}	1.19	2.23
heptane(1)+tetracosane(2)	WW2003QUE1 = Queimada et al. (2003)	333.15	5	WSD	1	{1.207}	0.78	2.23
heptane(1)+tetracosane(2)	WW2003QUE1 = Queimada et al. (2003)	333.15	5	JOAC1	1	{0.442}	0.87	2.23
heptane(1)+tetracosane(2)	WW2003QUE1 = Queimada et al. (2003)	333.15	5	BCRG	1	{0.21}	1.35	2.23
heptane(1)+tetracosane(2)	WW2003QUE1 = Queimada et al. (2003)	333.15	5	CW	2	{-0.234, 0.852}	0.74	2.23
heptane(1)+tetracosane(2)	WW2003QUE1 = Queimada et al. (2003)	333.15	5	RK2	2	{7.786, 0.814}	0.74	2.23
heptane(1)+tetracosane(2)	WW2003QUE1 = Queimada et al. (2003)	333.15	5	JOAC2	2	{0.473, 0.065}	0.78	2.23
heptane(1)+tetracosane(2)	WW2003QUE1 = Queimada et al. (2003)	333.15	5	FLW	2	{0.7, 0.906}	0.87	2.23
heptane(1)+tetracosane(2)	WW2003QUE1 = Queimada et al. (2003)	333.15	5	QYDH	2	{0.601, 1.433}	0.75	2.23
heptane(1)+tetracosane(2)	WW2003QUE1 = Queimada et al. (2003)	333.15	5	SIGMO	2	{5.079, 1.668}	0.74	2.23
heptane(1)+tetracosane(2)	WW2003QUE1 = Queimada et al. (2003)	333.15	5	RK3	3	{7.239, 0.814, 2.186}	0.63	2.23
heptane(1)+tetracosane(2)	WW2003QUE1 = Queimada et al. (2003)	333.15	5	JOAC3	3	{0.442, 0.065, 0.123}	0.63	2.23
heptane(1)+tetracosane(2)	WW2003QUE1 = Queimada et al. (2003)	333.15	5	SFF	3	{-1.014, 0.315, 0.301}	0.73	2.23
heptane(1)+tetracosane(2)	WW2003QUE1 = Queimada et al. (2003)	343.15	5	EBE	1	{0.419}	0.97	1.83
heptane(1)+tetracosane(2)	WW2003QUE1 = Queimada et al. (2003)	343.15	5	WSD	1	{1.259}	0.5	1.83
heptane(1)+tetracosane(2)	WW2003QUE1 = Queimada et al. (2003)	343.15	5	JOAC1	1	{0.529}	0.89	1.92
heptane(1)+tetracosane(2)	WW2003QUE1 = Queimada et al. (2003)	343.15	5	BCRG	1	{0.211}	1.17	2.19
heptane(1)+tetracosane(2)	WW2003QUE1 = Queimada et al. (2003)	343.15	5	CW	2	{0.039, 0.85}	0.49	1.83
heptane(1)+tetracosane(2)	WW2003QUE1 = Queimada et al. (2003)	343.15	5	RK2	2	{9.039, -0.18}	0.49	1.83
heptane(1)+tetracosane(2)	WW2003QUE1 = Queimada et al. (2003)	343.15	5	JOAC2	2	{0.565, 0.136}	0.56	1.83
heptane(1)+tetracosane(2)	WW2003QUE1 = Queimada et al. (2003)	343.15	5	FLW	2	{0.777, 0.798}	0.62	1.83
heptane(1)+tetracosane(2)	WW2003QUE1 = Queimada et al. (2003)	343.15	5	QYDH	2	{0.531, 1.416}	0.49	1.83
heptane(1)+tetracosane(2)	WW2003QUE1 = Queimada et al. (2003)	343.15	5	SIGMO	2	{4.814, 1.76}	0.57	1.83
heptane(1)+tetracosane(2)	WW2003QUE1 = Queimada et al. (2003)	343.15	5	RK3	3	{8.539, -0.18, 1.999}	0.38	1.83
heptane(1)+tetracosane(2)	WW2003QUE1 = Queimada et al. (2003)	343.15	5	JOAC3	3	{0.529, 0.136, 0.141}	0.38	1.83
heptane(1)+tetracosane(2)	WW2003QUE1 = Queimada et al. (2003)	343.15	5	SFF	3	{-0.819, -1.23, 10.655}	0.44	1.83
hexane(1)+octane(2)	WW70P1 = Pugachevich and Belyarov (1970)	313.15	7	EBE	1	{0.91}	0.22	0.59
hexane(1)+octane(2)	WW70P1 = Pugachevich and Belyarov (1970)	313.15	7	WSD	1	{1.013}	0.23	0.59
hexane(1)+octane(2)	WW70P1 = Pugachevich and Belyarov (1970)	313.15	7	JOAC1	1	{0.037}	0.21	0.59
hexane(1)+octane(2)	WW70P1 = Pugachevich and Belyarov (1970)	313.15	7	BCRG	1	{0.828}	0.22	0.59
hexane(1)+octane(2)	WW70P1 = Pugachevich and Belyarov (1970)	313.15	7	CW	2	{-0.701, 0.146}	0.21	0.59
hexane(1)+octane(2)	WW70P1 = Pugachevich and Belyarov (1970)	313.15	7	RK2	2	{0.369, 0.096}	0.21	0.59
hexane(1)+octane(2)	WW70P1 = Pugachevich and Belyarov (1970)	313.15	7	JOAC2	2	{0.038, -0.002}	0.21	0.59
hexane(1)+octane(2)	WW70P1 = Pugachevich and Belyarov (1970)	313.15	7	FLW	2	{1.476, 0.693}	0.35	0.75
hexane(1)+octane(2)	WW70P1 = Pugachevich and Belyarov (1970)	313.15	7	QYDH	2	{0.919, 1.032}	0.2	0.59
hexane(1)+octane(2)	WW70P1 = Pugachevich and Belyarov (1970)	313.15	7	SIGMO	2	{5.184, 1.07}	0.2	0.59
hexane(1)+octane(2)	WW70P1 = Pugachevich and Belyarov (1970)	313.15	7	RK3	3	{0.317, 0.282, 0.581}	0.18	0.59
hexane(1)+octane(2)	WW70P1 = Pugachevich and Belyarov (1970)	313.15	7	JOAC3	3	{0.035, -0.012, 0.03}	0.18	0.59
hexane(1)+octane(2)	WW70P1 = Pugachevich and Belyarov (1970)	313.15	7	SFF	3	{-0.135, 0.055, 1.165}	0.21	0.59
hexane(1)+heptane(2)	WW70P1 = Pugachevich and Belyarov (1970)	303.15	9	EBE	1	{1.469}	0.38	0.93
hexane(1)+heptane(2)	WW70P1 = Pugachevich and Belyarov (1970)	303.15	9	WSD	1	{0.981}	0.37	0.93
hexane(1)+heptane(2)	WW70P1 = Pugachevich and Belyarov (1970)	303.15	9	JOAC1	1	{-0.037}	0.37	0.93
hexane(1)+heptane(2)	WW70P1 = Pugachevich and Belyarov (1970)	303.15	9	BCRG	1	{2.149}	0.38	0.93
hexane(1)+heptane(2)	WW70P1 = Pugachevich and Belyarov (1970)	303.15	9	CW	2	{0.751, -0.226}	0.31	0.93
hexane(1)+heptane(2)	WW70P1 = Pugachevich and Belyarov (1970)	303.15	9	RK2	2	{-0.81, 0.13}	0.35	0.93
hexane(1)+heptane(2)	WW70P1 = Pugachevich and Belyarov (1970)	303.15	9	JOAC2	2	{-0.04, -0.01}	0.35	0.93
hexane(1)+heptane(2)	WW70P1 = Pugachevich and Belyarov (1970)	303.15	9	FLW	2	{0.966, 1.06}	0.25	0.93
hexane(1)+heptane(2)	WW70P1 = Pugachevich and Belyarov (1970)	303.15	9	QYDH	2	{1.442, 0.984}	0.38	0.93
hexane(1)+heptane(2)	WW70P1 = Pugachevich and Belyarov (1970)	303.15	9	SIGMO	2	{0.398, 0.976}	0.38	0.93
hexane(1)+heptane(2)	WW70P1 = Pugachevich and Belyarov (1970)	303.15	9	RK3	3	{-0.634, -0.015, -1.225}	0.24	0.93
hexane(1)+heptane(2)	WW70P1 = Pugachevich and Belyarov (1970)	303.15	9	JOAC3	3	{-0.03, -0.001, -0.07}	0.24	0.93
hexane(1)+heptane(2)	WW70P1 = Pugachevich and Belyarov (1970)	303.15	9	SFF	3	{2.066, -1.655, 0.}	0.36	0.93
decane(1)+dodecane(2)	WW76R1 = Ramakrishnan et al. (1976)	303.15	7	EBE	1	{1.046}	0.04	0.16
decane(1)+dodecane(2)	WW76R1 = Ramakrishnan et al. (1976)	303.15	7	WSD	1	{0.999}	0.04	0.15
decane(1)+dodecane(2)	WW76R1 = Ramakrishnan et al. (1976)	303.15	7	JOAC1	1	{-0.001}	0.04	0.15
decane(1)+dodecane(2)	WW76R1 = Ramakrishnan et al. (1976)	303.15	7	BCRG	1	{1.094}	0.04	0.16
decane(1)+dodecane(2)	WW76R1 = Ramakrishnan et al. (1976)	303.15	7	CW	2	{-12.874, -0.326}	0.04	0.17
decane(1)+dodecane(2)	WW76R1 = Ramakrishnan et al. (1976)	303.15	7	RK2	2	{-0.069, -0.032}	0.04	0.17
decane(1)+dodecane(2)	WW76R1 = Ramakrishnan et al. (1976)	303.15	7	JOAC2	2	{-0.001, 0.001}	0.04	0.16
decane(1)+dodecane(2)	WW76R1 = Ramakrishnan et al. (1976)	303.15	7	FLW	2	{1.853, 0.558}	0.12	0.51
decane(1)+dodecane(2)	WW76R1 = Ramakrishnan et al. (1976)	303.15	7	QYDH	2	{1.027, 0.974}	0.04	0.17
decane(1)+dodecane(2)	WW76R1 = Ramakrishnan et al. (1976)	303.15	7	SIGMO	2	{5.328, 0.968}	0.04	0.16
decane(1)+dodecane(2)	WW76R1 = Ramakrishnan et al. (1976)	303.15	7	RK3	3	{-0.07, 0.011, 0.072}	0.04	0.16
decane(1)+dodecane(2)	WW76R1 = Ramakrishnan et al. (1976)	303.15	7	JOAC3	3	{-0.001, 0., 0.003}	0.04	0.16
decane(1)+dodecane(2)	WW76R1 = Ramakrishnan et al. (1976)	303.15	7	SFF	3	{0.063, -0.04, 1.064}	0.04	0.17
methane(1)+ethane(2)	WW2013BAI4 = Baidakov et al. (2013)	133.15	6	EBE	1	{1.545}	1.12	3
methane(1)+ethane(2)	WW2013BAI4 = Baidakov et al. (2013)	133.15	6	WSD	1	{0.896}	1.17	3
methane(1)+ethane(2)	WW2013BAI4 = Baidakov et al. (2013)	133.15	6	JOAC1	1	{0.07}	1.13	3
methane(1)+ethane(2)	WW2013BAI4 = Baidakov et al. (2013)	133.15	6	BCRG	1	{2.393}	1.17	3
methane(1)+ethane(2)	WW2013BAI4 = Baidakov et al. (2013)	133.15	6	CW	2	{-0.626, -0.56}	1.12	3
methane(1)+ethane(2)	WW2013BAI4 = Baidakov et al. (2013)	133.15	6	RK2	2	{-6.74, -1.524}	1.07	3
methane(1)+ethane(2)	WW2013BAI4 = Baidakov et al. (2013)	133.15	6	JOAC2	2	{0.047, -0.133}	1.12	3
methane(1)+ethane(2)	WW2013BAI4 = Baidakov et al. (2013)	133.15	6	FLW	2	{0.886, 1.372}	1.29	3
methane(1)+ethane(2)	WW2013BAI4 = Baidakov et al. (2013)	133.15	6	QYDH	2	{1.816, 1.19}	0.93	3
methane(1)+ethane(2)	WW2013BAI4 = Baidakov et al. (2013)	133.15	6	SIGMO	2	{-0.077, 1.27}	0.88	3
methane(1)+ethane(2)	WW2013BAI4 = Baidakov et al. (2013)	133.15	6	RK3	3	{-7.224, 0.842, 4.857}	0.57	3
methane(1)+ethane(2)	WW2013BAI4 = Baidakov et al. (2013)	133.15	6	JOAC3	3	{0.043, -0.061, 0.297}	0.59	3
methane(1)+ethane(2)	WW2013BAI4 = Baidakov et al. (2013)	133.15	6	SFF	3	{1.328, -0.986, 0.125}	1.17	3
methane(1)+ethane(2)	WW2013BAI4 = Baidakov et al. (2013)	173.15	15	EBE	1	{1.415}	1.49	2.8
methane(1)+ethane(2)	WW2013BAI4 = Baidakov et al. (2013)	173.15	15	WSD	1	{1.22}	1.74	3.5
methane(1)+ethane(2)	WW2013BAI4 = Baidakov et al. (2013)	173.15	15	JOAC1	1	{1.48}	5.31	12.57
methane(1)+ethane(2)	WW2013BAI4 = Baidakov et al. (2013)	173.15	15	BCRG	1	{2.064}	1.47	3.24
methane(1)+ethane(2)	WW2013BAI4 = Baidakov et al. (2013)	173.15	15	CW	2	{-0.751, -0.498}	1.45	3.5
methane(1)+ethane(2)	WW2013BAI4 = Baidakov et al. (2013)	173.15	15	RK2	2	{-5.751, -1.905}	1.36	3.44
methane(1)+ethane(2)	WW2013BAI4 = Baidakov et al. (2013)	173.15	15	JOAC2	2	{1.432, 0.95}	2.49	6.03
methane(1)+ethane(2)	WW2013BAI4 = Baidakov et al. (2013)	173.15	15	FLW	2	{0.877, 1.365}	1.84	3.5
methane(1)+ethane(2)	WW2013BAI4 = Baidakov et al. (2013)	173.15	15	QYDH	2	{1.42, 1.014}	1.48	2.84
methane(1)+ethane(2)	WW2013BAI4 = Baidakov et al. (2013)	173.15	15	SIGMO	2	{0.334, 1.025}	1.47	2.86
methane(1)+ethane(2)	WW2013BAI4 = Baidakov et al. (2013)	173.15	15	RK3	3	{-6.157, -0.052, 4.514}	0.79	2.48
methane(1)+ethane(2)	WW2013BAI4 = Baidakov et al. (2013)	173.15	15	JOAC3	3	{1.357, 0.878, 1.041}	0.82	1.72
methane(1)+ethane(2)	WW2013BAI4 = Baidakov et al. (2013)	173.15	15	SFF	3	{0.394, -0.342, 5.088}	1.07	2.81
pentane(1)+heptane(2)	WW2010MOH1 = Mohsen-Nia et al. (2010)	293.15	10	EBE	1	{0.814}	0.18	0.48
pentane(1)+heptane(2)	WW2010MOH1 = Mohsen-Nia et al. (2010)	293.15	10	WSD	1	{1.031}	0.18	0.48
pentane(1)+heptane(2)	WW2010MOH1 = Mohsen-Nia et al. (2010)	293.15	10	JOAC1	1	{0.075}	0.19	0.48
pentane(1)+heptane(2)	WW2010MOH1 = Mohsen-Nia et al. (2010)	293.15	10	BCRG	1	{0.661}	0.18	0.48
pentane(1)+heptane(2)	WW2010MOH1 = Mohsen-Nia et al. (2010)	293.15	10	CW	2	{0.055, 0.197}	0.18	0.48
pentane(1)+heptane(2)	WW2010MOH1 = Mohsen-Nia et al. (2010)	293.15	10	RK2	2	{0.857, -0.024}	0.18	0.48
pentane(1)+heptane(2)	WW2010MOH1 = Mohsen-Nia et al. (2010)	293.15	10	JOAC2	2	{0.075, 0.009}	0.18	0.48
pentane(1)+heptane(2)	WW2010MOH1 = Mohsen-Nia et al. (2010)	293.15	10	FLW	2	{1.538, 0.673}	0.24	0.71
pentane(1)+heptane(2)	WW2010MOH1 = Mohsen-Nia et al. (2010)	293.15	10	QYDH	2	{0.825, 1.016}	0.18	0.48
pentane(1)+heptane(2)	WW2010MOH1 = Mohsen-Nia et al. (2010)	293.15	10	SIGMO	2	{7.44, 1.154}	0.22	0.48
pentane(1)+heptane(2)	WW2010MOH1 = Mohsen-Nia et al. (2010)	293.15	10	RK3	3	{0.912, 0.04, -0.466}	0.17	0.48
pentane(1)+heptane(2)	WW2010MOH1 = Mohsen-Nia et al. (2010)	293.15	10	JOAC3	3	{0.078, 0.005, -0.024}	0.17	0.48
pentane(1)+heptane(2)	WW2010MOH1 = Mohsen-Nia et al. (2010)	293.15	10	SFF	3	{-0.198, -0.011, 1.188}	0.18	0.48
pentane(1)+heptane(2)	WW2010MOH1 = Mohsen-Nia et al. (2010)	323.15	10	EBE	1	{1.453}	2.06	6.61
pentane(1)+heptane(2)	WW2010MOH1 = Mohsen-Nia et al. (2010)	323.15	10	WSD	1	{0.954}	1.98	6.61
pentane(1)+heptane(2)	WW2010MOH1 = Mohsen-Nia et al. (2010)	323.15	10	JOAC1	1	{-0.068}	2.04	6.61
pentane(1)+heptane(2)	WW2010MOH1 = Mohsen-Nia et al. (2010)	323.15	10	BCRG	1	{2.122}	2.1	6.61
pentane(1)+heptane(2)	WW2010MOH1 = Mohsen-Nia et al. (2010)	323.15	10	CW	2	{0.99999999999999852214806602524894893057`25., -0.172}	0.92	6.61
pentane(1)+heptane(2)	WW2010MOH1 = Mohsen-Nia et al. (2010)	323.15	10	RK2	2	{-1.962, 1.889}	1.77	6.61
pentane(1)+heptane(2)	WW2010MOH1 = Mohsen-Nia et al. (2010)	323.15	10	JOAC2	2	{-0.079, -0.082}	1.8	6.61
pentane(1)+heptane(2)	WW2010MOH1 = Mohsen-Nia et al. (2010)	323.15	10	FLW	2	{1.97, 0.672}	1.56	6.61
pentane(1)+heptane(2)	WW2010MOH1 = Mohsen-Nia et al. (2010)	323.15	10	QYDH	2	{1.707, 1.192}	1.88	6.61
pentane(1)+heptane(2)	WW2010MOH1 = Mohsen-Nia et al. (2010)	323.15	10	SIGMO	2	{-0.061, 1.305}	1.9	6.61
pentane(1)+heptane(2)	WW2010MOH1 = Mohsen-Nia et al. (2010)	323.15	10	RK3	3	{-1.481, 1.408, -3.394}	1.54	6.61
pentane(1)+heptane(2)	WW2010MOH1 = Mohsen-Nia et al. (2010)	323.15	10	JOAC3	3	{-0.054, -0.114, -0.256}	1.57	6.61
pentane(1)+heptane(2)	WW2010MOH1 = Mohsen-Nia et al. (2010)	323.15	10	SFF	3	{3.205, -2.827, 0.}	1.98	6.61

## Sheet: CASE 2A
MIXTURE	REFERENCES	T / K	N-data	model	Nº of coefficients	Coefficients Value	AAD (%)	PDm (%)
decane(1)+docosane(2)	WW2005QUE1 = Queimada et al. (2005).	313.15	4	EBE	1	{0.512}	1.28	2.98
decane(1)+docosane(2)	WW2005QUE1 = Queimada et al. (2005).	313.15	4	WSD	1	{1.092}	0.98	2.98
decane(1)+docosane(2)	WW2005QUE1 = Queimada et al. (2005).	313.15	4	JOAC1	1	{0.192}	0.88	2.77
decane(1)+docosane(2)	WW2005QUE1 = Queimada et al. (2005).	313.15	4	BCRG	1	{0.257}	1.36	3.16
decane(1)+docosane(2)	WW2005QUE1 = Queimada et al. (2005).	313.15	4	CW	2	{-2.914, 1.898}	0.57	2.13
decane(1)+docosane(2)	WW2005QUE1 = Queimada et al. (2005).	313.15	4	RK2	2	{4.325, 7.324}	0.44	0.99
decane(1)+docosane(2)	WW2005QUE1 = Queimada et al. (2005).	313.15	4	JOAC2	2	{0.192, -0.238}	0.5	0.89
decane(1)+docosane(2)	WW2005QUE1 = Queimada et al. (2005).	313.15	4	FLW	2	{0.511, 1.449}	0.47	1.74
decane(1)+docosane(2)	WW2005QUE1 = Queimada et al. (2005).	313.15	4	QYDH	2	{1.53, 2.849}	0.36	0.79
decane(1)+docosane(2)	WW2005QUE1 = Queimada et al. (2005).	313.15	4	SIGMO	2	{-0.168, 3.734}	0.43	0.91
decane(1)+docosane(2)	WW2005QUE1 = Queimada et al. (2005).	313.15	4	RK3	3	{4.543, 2.488, -8.666}	0.05	0.22
decane(1)+docosane(2)	WW2005QUE1 = Queimada et al. (2005).	313.15	4	JOAC3	3	{0.202, -0.077, -0.375}	0.07	0.25
decane(1)+docosane(2)	WW2005QUE1 = Queimada et al. (2005).	313.15	4	SFF	3	{-0.904, 2.843, 5.072}	0.02	0.07
decane(1)+tetracosane(2)	WW2005QUE1 = Queimada et al. (2005).	323.15	5	EBE	1	{0.49}	0.96	2.29
decane(1)+tetracosane(2)	WW2005QUE1 = Queimada et al. (2005).	323.15	5	WSD	1	{1.092}	0.61	1.78
decane(1)+tetracosane(2)	WW2005QUE1 = Queimada et al. (2005).	323.15	5	JOAC1	1	{0.193}	0.49	1.61
decane(1)+tetracosane(2)	WW2005QUE1 = Queimada et al. (2005).	323.15	5	BCRG	1	{0.272}	1.05	2.54
decane(1)+tetracosane(2)	WW2005QUE1 = Queimada et al. (2005).	323.15	5	CW	2	{-4.771, 2.437}	0.14	0.39
decane(1)+tetracosane(2)	WW2005QUE1 = Queimada et al. (2005).	323.15	5	RK2	2	{4.234, 2.203}	0.28	0.92
decane(1)+tetracosane(2)	WW2005QUE1 = Queimada et al. (2005).	323.15	5	JOAC2	2	{0.198, -0.065}	0.28	0.92
decane(1)+tetracosane(2)	WW2005QUE1 = Queimada et al. (2005).	323.15	5	FLW	2	{0.564, 1.322}	0.38	1.1
decane(1)+tetracosane(2)	WW2005QUE1 = Queimada et al. (2005).	323.15	5	QYDH	2	{0.78, 1.771}	0.35	1.11
decane(1)+tetracosane(2)	WW2005QUE1 = Queimada et al. (2005).	323.15	5	SIGMO	2	{0.117, 2.138}	0.3	1.01
decane(1)+tetracosane(2)	WW2005QUE1 = Queimada et al. (2005).	323.15	5	RK3	3	{4.125, 3.057, 3.254}	0.06	0.18
decane(1)+tetracosane(2)	WW2005QUE1 = Queimada et al. (2005).	323.15	5	JOAC3	3	{0.194, -0.095, 0.121}	0.06	0.15
decane(1)+tetracosane(2)	WW2005QUE1 = Queimada et al. (2005).	323.15	5	SFF	3	{-4.504, 4.045, 0.101}	0.18	0.6
heptane(1)+docosane(2)	WW2003QUE1 = Queimada et al. (2003).	313.15	3	EBE	1	{0.663}	0.15	0.3
heptane(1)+docosane(2)	WW2003QUE1 = Queimada et al. (2003).	313.15	3	WSD	1	{1.104}	0.36	0.55
heptane(1)+docosane(2)	WW2003QUE1 = Queimada et al. (2003).	313.15	3	JOAC1	1	{0.242}	0.62	0.96
heptane(1)+docosane(2)	WW2003QUE1 = Queimada et al. (2003).	313.15	3	BCRG	1	{0.435}	0.08	0.23
heptane(1)+docosane(2)	WW2003QUE1 = Queimada et al. (2003).	313.15	3	CW	2	{0.525, 0.284}	0.07	0.19
heptane(1)+docosane(2)	WW2003QUE1 = Queimada et al. (2003).	313.15	3	RK2	2	{3.665, -1.348}	0.03	0.09
heptane(1)+docosane(2)	WW2003QUE1 = Queimada et al. (2003).	313.15	3	JOAC2	2	{0.244, 0.1}	0.02	0.05
heptane(1)+docosane(2)	WW2003QUE1 = Queimada et al. (2003).	313.15	3	FLW	2	{1.427, 0.688}	0.22	0.66
heptane(1)+docosane(2)	WW2003QUE1 = Queimada et al. (2003).	313.15	3	QYDH	2	{0.641, 0.936}	0.04	0.09
heptane(1)+docosane(2)	WW2003QUE1 = Queimada et al. (2003).	313.15	3	SIGMO	2	{5.33, 1.326}	0.66	1.09
heptane(1)+docosane(2)	WW2003QUE1 = Queimada et al. (2003).	313.15	3	RK3	3	{3.749, -1.348, -0.335}	0	0
heptane(1)+docosane(2)	WW2003QUE1 = Queimada et al. (2003).	313.15	3	JOAC3	3	{0.242, 0.1, 0.008}	0	0.01
heptane(1)+docosane(2)	WW2003QUE1 = Queimada et al. (2003).	313.15	3	SFF	3	{0.276, -0.788, 0.198}	0.02	0.06
pentane(1)+heptane(2)	WW2010MOH1 = Mohsen-Nia et al. (2010)	298.15	8	EBE	1	{0.986}	0.31	0.91
pentane(1)+heptane(2)	WW2010MOH1 = Mohsen-Nia et al. (2010)	298.15	8	WSD	1	{1.01}	0.31	0.92
pentane(1)+heptane(2)	WW2010MOH1 = Mohsen-Nia et al. (2010)	298.15	8	JOAC1	1	{0.039}	0.3	0.91
pentane(1)+heptane(2)	WW2010MOH1 = Mohsen-Nia et al. (2010)	298.15	8	BCRG	1	{0.972}	0.31	0.91
pentane(1)+heptane(2)	WW2010MOH1 = Mohsen-Nia et al. (2010)	298.15	8	CW	2	{-5.387, 0.098}	0.3	0.92
pentane(1)+heptane(2)	WW2010MOH1 = Mohsen-Nia et al. (2010)	298.15	8	RK2	2	{0.266, 0.792}	0.25	0.81
pentane(1)+heptane(2)	WW2010MOH1 = Mohsen-Nia et al. (2010)	298.15	8	JOAC2	2	{0.047, -0.041}	0.25	0.83
pentane(1)+heptane(2)	WW2010MOH1 = Mohsen-Nia et al. (2010)	298.15	8	FLW	2	{1.419, 0.747}	0.28	0.73
pentane(1)+heptane(2)	WW2010MOH1 = Mohsen-Nia et al. (2010)	298.15	8	QYDH	2	{1.078, 1.191}	0.26	0.85
pentane(1)+heptane(2)	WW2010MOH1 = Mohsen-Nia et al. (2010)	298.15	8	SIGMO	2	{0.309, 1.308}	0.27	0.92
pentane(1)+heptane(2)	WW2010MOH1 = Mohsen-Nia et al. (2010)	298.15	8	RK3	3	{0.279, 0.742, -0.347}	0.25	0.77
pentane(1)+heptane(2)	WW2010MOH1 = Mohsen-Nia et al. (2010)	298.15	8	JOAC3	3	{0.048, -0.037, -0.027}	0.24	0.77
pentane(1)+heptane(2)	WW2010MOH1 = Mohsen-Nia et al. (2010)	298.15	8	SFF	3	{-0.158, 0.328, 1.788}	0.25	0.78
pentane(1)+heptane(2)	WW2010MOH1 = Mohsen-Nia et al. (2010)	305.15	8	EBE	1	{0.892}	0.21	0.88
pentane(1)+heptane(2)	WW2010MOH1 = Mohsen-Nia et al. (2010)	305.15	8	WSD	1	{1.025}	0.21	0.87
pentane(1)+heptane(2)	WW2010MOH1 = Mohsen-Nia et al. (2010)	305.15	8	JOAC1	1	{0.068}	0.24	0.92
pentane(1)+heptane(2)	WW2010MOH1 = Mohsen-Nia et al. (2010)	305.15	8	BCRG	1	{0.797}	0.21	0.87
pentane(1)+heptane(2)	WW2010MOH1 = Mohsen-Nia et al. (2010)	305.15	8	CW	2	{0.223, 0.098}	0.2	0.85
pentane(1)+heptane(2)	WW2010MOH1 = Mohsen-Nia et al. (2010)	305.15	8	RK2	2	{0.53, -0.172}	0.2	0.81
pentane(1)+heptane(2)	WW2010MOH1 = Mohsen-Nia et al. (2010)	305.15	8	JOAC2	2	{0.066, 0.035}	0.19	0.57
pentane(1)+heptane(2)	WW2010MOH1 = Mohsen-Nia et al. (2010)	305.15	8	FLW	2	{1.019, 0.952}	0.2	0.48
pentane(1)+heptane(2)	WW2010MOH1 = Mohsen-Nia et al. (2010)	305.15	8	QYDH	2	{0.851, 0.912}	0.17	0.5
pentane(1)+heptane(2)	WW2010MOH1 = Mohsen-Nia et al. (2010)	305.15	8	SIGMO	2	{7.71, 1.076}	0.26	1.03
pentane(1)+heptane(2)	WW2010MOH1 = Mohsen-Nia et al. (2010)	305.15	8	RK3	3	{0.564, -0.403, -0.973}	0.06	0.38
pentane(1)+heptane(2)	WW2010MOH1 = Mohsen-Nia et al. (2010)	305.15	8	JOAC3	3	{0.073, 0.031, -0.055}	0.06	0.36
pentane(1)+heptane(2)	WW2010MOH1 = Mohsen-Nia et al. (2010)	305.15	8	SFF	3	{0.062, -0.244, 0.612}	0.19	0.56
pentane(1)+heptane(2)	WW2010MOH1 = Mohsen-Nia et al. (2010)	318.15	8	EBE	1	{0.903}	0.23	0.51
pentane(1)+heptane(2)	WW2010MOH1 = Mohsen-Nia et al. (2010)	318.15	8	WSD	1	{1.032}	0.22	0.5
pentane(1)+heptane(2)	WW2010MOH1 = Mohsen-Nia et al. (2010)	318.15	8	JOAC1	1	{0.095}	0.22	0.47
pentane(1)+heptane(2)	WW2010MOH1 = Mohsen-Nia et al. (2010)	318.15	8	BCRG	1	{0.817}	0.22	0.51
pentane(1)+heptane(2)	WW2010MOH1 = Mohsen-Nia et al. (2010)	318.15	8	CW	2	{-0.084, 0.108}	0.22	0.5
pentane(1)+heptane(2)	WW2010MOH1 = Mohsen-Nia et al. (2010)	318.15	8	RK2	2	{0.542, 0.324}	0.22	0.48
pentane(1)+heptane(2)	WW2010MOH1 = Mohsen-Nia et al. (2010)	318.15	8	JOAC2	2	{0.09, 0.023}	0.22	0.52
pentane(1)+heptane(2)	WW2010MOH1 = Mohsen-Nia et al. (2010)	318.15	8	FLW	2	{1.185, 0.848}	0.09	0.33
pentane(1)+heptane(2)	WW2010MOH1 = Mohsen-Nia et al. (2010)	318.15	8	QYDH	2	{0.892, 0.972}	0.22	0.52
pentane(1)+heptane(2)	WW2010MOH1 = Mohsen-Nia et al. (2010)	318.15	8	SIGMO	2	{7.515, 1.067}	0.25	0.46
pentane(1)+heptane(2)	WW2010MOH1 = Mohsen-Nia et al. (2010)	318.15	8	RK3	3	{0.61, -0.023, -1.129}	0.05	0.3
pentane(1)+heptane(2)	WW2010MOH1 = Mohsen-Nia et al. (2010)	318.15	8	JOAC3	3	{0.098, 0.015, -0.075}	0.07	0.33
pentane(1)+heptane(2)	WW2010MOH1 = Mohsen-Nia et al. (2010)	318.15	8	SFF	3	{-0.115, 0.273, 6.372}	0.12	0.34

## Sheet: CASE 2B
MIXTURE	REFERENCES	T / K	N-data	model	Nº of coefficients	Coefficients Value	AAD (%)	PDm (%)
decane(1)+docosane(2)	WW2005QUE1 = Queimada et al. (2005).	313.15	5	EBE	1	{0.461}	1.21	2.59
decane(1)+docosane(2)	WW2005QUE1 = Queimada et al. (2005).	313.15	5	WSD	1	{1.107}	0.9	2.3
decane(1)+docosane(2)	WW2005QUE1 = Queimada et al. (2005).	313.15	5	JOAC1	1	{0.222}	0.79	2.03
decane(1)+docosane(2)	WW2005QUE1 = Queimada et al. (2005).	313.15	5	BCRG	1	{0.205}	1.31	2.85
decane(1)+docosane(2)	WW2005QUE1 = Queimada et al. (2005).	313.15	5	CW	2	{-1.158, 1.35}	0.65	1.63
decane(1)+docosane(2)	WW2005QUE1 = Queimada et al. (2005).	313.15	5	RK2	2	{4.99, 5.653}	0.57	1.49
decane(1)+docosane(2)	WW2005QUE1 = Queimada et al. (2005).	313.15	5	JOAC2	2	{0.222, -0.165}	0.62	1.49
decane(1)+docosane(2)	WW2005QUE1 = Queimada et al. (2005).	313.15	5	FLW	2	{0.573, 1.287}	0.57	1.49
decane(1)+docosane(2)	WW2005QUE1 = Queimada et al. (2005).	313.15	5	QYDH	2	{1.064, 2.446}	0.49	1.49
decane(1)+docosane(2)	WW2005QUE1 = Queimada et al. (2005).	313.15	5	SIGMO	2	{-0.109, 3.215}	0.54	1.49
decane(1)+docosane(2)	WW2005QUE1 = Queimada et al. (2005).	313.15	5	RK3	3	{5.169, 1.793, -6.929}	0.33	1.49
decane(1)+docosane(2)	WW2005QUE1 = Queimada et al. (2005).	313.15	5	JOAC3	3	{0.23, -0.045, -0.297}	0.34	1.49
decane(1)+docosane(2)	WW2005QUE1 = Queimada et al. (2005).	313.15	5	SFF	3	{-0.939, 2.158, 5.322}	0.31	1.49
decane(1)+tetracosane(2)	WW2005QUE1 = Queimada et al. (2005).	323.15	6	EBE	1	{0.474}	0.96	2.35
decane(1)+tetracosane(2)	WW2005QUE1 = Queimada et al. (2005).	323.15	6	WSD	1	{1.117}	0.67	1.62
decane(1)+tetracosane(2)	WW2005QUE1 = Queimada et al. (2005).	323.15	6	JOAC1	1	{0.239}	0.64	1.62
decane(1)+tetracosane(2)	WW2005QUE1 = Queimada et al. (2005).	323.15	6	BCRG	1	{0.218}	1.06	2.48
decane(1)+tetracosane(2)	WW2005QUE1 = Queimada et al. (2005).	323.15	6	CW	2	{-0.853, 1.159}	0.56	1.62
decane(1)+tetracosane(2)	WW2005QUE1 = Queimada et al. (2005).	323.15	6	RK2	2	{4.956, 1.483}	0.59	1.62
decane(1)+tetracosane(2)	WW2005QUE1 = Queimada et al. (2005).	323.15	6	JOAC2	2	{0.232, -0.031}	0.6	1.62
decane(1)+tetracosane(2)	WW2005QUE1 = Queimada et al. (2005).	323.15	6	FLW	2	{0.66, 1.136}	0.7	1.62
decane(1)+tetracosane(2)	WW2005QUE1 = Queimada et al. (2005).	323.15	6	QYDH	2	{0.679, 1.699}	0.65	1.62
decane(1)+tetracosane(2)	WW2005QUE1 = Queimada et al. (2005).	323.15	6	SIGMO	2	{0.252, 2.039}	0.61	1.62
decane(1)+tetracosane(2)	WW2005QUE1 = Queimada et al. (2005).	323.15	6	RK3	3	{4.815, 1.977, 4.354}	0.3	1.62
decane(1)+tetracosane(2)	WW2005QUE1 = Queimada et al. (2005).	323.15	6	JOAC3	3	{0.227, -0.044, 0.173}	0.28	1.62
decane(1)+tetracosane(2)	WW2005QUE1 = Queimada et al. (2005).	323.15	6	SFF	3	{-2.202, 1.569, 0.174}	0.54	1.62
heptane(1)+docosane(2)	WW2003QUE1 = Queimada et al. (2003).	313.15	4	EBE	1	{0.641}	0.45	1.05
heptane(1)+docosane(2)	WW2003QUE1 = Queimada et al. (2003).	313.15	4	WSD	1	{1.114}	0.64	1.05
heptane(1)+docosane(2)	WW2003QUE1 = Queimada et al. (2003).	313.15	4	JOAC1	1	{0.263}	0.86	1.36
heptane(1)+docosane(2)	WW2003QUE1 = Queimada et al. (2003).	313.15	4	BCRG	1	{0.405}	0.39	1.05
heptane(1)+docosane(2)	WW2003QUE1 = Queimada et al. (2003).	313.15	4	CW	2	{0.553, 0.316}	0.31	1.05
heptane(1)+docosane(2)	WW2003QUE1 = Queimada et al. (2003).	313.15	4	RK2	2	{4.182, -1.865}	0.28	1.05
heptane(1)+docosane(2)	WW2003QUE1 = Queimada et al. (2003).	313.15	4	JOAC2	2	{0.272, 0.128}	0.32	1.05
heptane(1)+docosane(2)	WW2003QUE1 = Queimada et al. (2003).	313.15	4	FLW	2	{1.48, 0.664}	0.52	1.05
heptane(1)+docosane(2)	WW2003QUE1 = Queimada et al. (2003).	313.15	4	QYDH	2	{0.599, 0.904}	0.27	1.05
heptane(1)+docosane(2)	WW2003QUE1 = Queimada et al. (2003).	313.15	4	SIGMO	2	{6.057, 1.356}	0.88	1.25
heptane(1)+docosane(2)	WW2003QUE1 = Queimada et al. (2003).	313.15	4	RK3	3	{4.137, -1.865, 0.182}	0.26	1.05
heptane(1)+docosane(2)	WW2003QUE1 = Queimada et al. (2003).	313.15	4	JOAC3	3	{0.263, 0.128, 0.036}	0.26	1.05
heptane(1)+docosane(2)	WW2003QUE1 = Queimada et al. (2003).	313.15	4	SFF	3	{-0.27, -0.381, 1.187}	0.26	1.05
pentane(1)+heptane(2)	WW2010MOH1 = Mohsen-Nia et al. (2010)	298.15	9	EBE	1	{1.052}	0.57	1.75
pentane(1)+heptane(2)	WW2010MOH1 = Mohsen-Nia et al. (2010)	298.15	9	WSD	1	{1.001}	0.57	1.75
pentane(1)+heptane(2)	WW2010MOH1 = Mohsen-Nia et al. (2010)	298.15	9	JOAC1	1	{0.017}	0.57	1.74
pentane(1)+heptane(2)	WW2010MOH1 = Mohsen-Nia et al. (2010)	298.15	9	BCRG	1	{1.106}	0.57	1.75
pentane(1)+heptane(2)	WW2010MOH1 = Mohsen-Nia et al. (2010)	298.15	9	CW	2	{1.018, -0.027}	0.28	0.91
pentane(1)+heptane(2)	WW2010MOH1 = Mohsen-Nia et al. (2010)	298.15	9	RK2	2	{-0.048, 1.301}	0.38	1.55
pentane(1)+heptane(2)	WW2010MOH1 = Mohsen-Nia et al. (2010)	298.15	9	JOAC2	2	{0.026, -0.074}	0.39	1.57
pentane(1)+heptane(2)	WW2010MOH1 = Mohsen-Nia et al. (2010)	298.15	9	FLW	2	{1.624, 0.684}	0.4	1.45
pentane(1)+heptane(2)	WW2010MOH1 = Mohsen-Nia et al. (2010)	298.15	9	QYDH	2	{1.243, 1.281}	0.45	1.64
pentane(1)+heptane(2)	WW2010MOH1 = Mohsen-Nia et al. (2010)	298.15	9	SIGMO	2	{0.104, 1.418}	0.47	1.66
pentane(1)+heptane(2)	WW2010MOH1 = Mohsen-Nia et al. (2010)	298.15	9	RK3	3	{0.016, 0.976, -1.086}	0.37	1.44
pentane(1)+heptane(2)	WW2010MOH1 = Mohsen-Nia et al. (2010)	298.15	9	JOAC3	3	{0.031, -0.054, -0.067}	0.36	1.47
pentane(1)+heptane(2)	WW2010MOH1 = Mohsen-Nia et al. (2010)	298.15	9	SFF	3	{-0.122, 0.494, 1.998}	0.37	1.52
pentane(1)+heptane(2)	WW2010MOH1 = Mohsen-Nia et al. (2010)	305.15	9	EBE	1	{1.072}	0.82	2.2
pentane(1)+heptane(2)	WW2010MOH1 = Mohsen-Nia et al. (2010)	305.15	9	WSD	1	{0.999}	0.83	2.2
pentane(1)+heptane(2)	WW2010MOH1 = Mohsen-Nia et al. (2010)	305.15	9	JOAC1	1	{0.016}	0.82	2.2
pentane(1)+heptane(2)	WW2010MOH1 = Mohsen-Nia et al. (2010)	305.15	9	BCRG	1	{1.149}	0.82	2.2
pentane(1)+heptane(2)	WW2010MOH1 = Mohsen-Nia et al. (2010)	305.15	9	CW	2	{1.017, -0.032}	0.49	2.2
pentane(1)+heptane(2)	WW2010MOH1 = Mohsen-Nia et al. (2010)	305.15	9	RK2	2	{-0.13, 0.599}	0.79	2.2
pentane(1)+heptane(2)	WW2010MOH1 = Mohsen-Nia et al. (2010)	305.15	9	JOAC2	2	{0.018, -0.01}	0.8	2.2
pentane(1)+heptane(2)	WW2010MOH1 = Mohsen-Nia et al. (2010)	305.15	9	FLW	2	{1.508, 0.728}	0.61	2.2
pentane(1)+heptane(2)	WW2010MOH1 = Mohsen-Nia et al. (2010)	305.15	9	QYDH	2	{1.089, 1.035}	0.81	2.2
pentane(1)+heptane(2)	WW2010MOH1 = Mohsen-Nia et al. (2010)	305.15	9	SIGMO	2	{0.789, 1.056}	0.81	2.2
pentane(1)+heptane(2)	WW2010MOH1 = Mohsen-Nia et al. (2010)	305.15	9	RK3	3	{0.083, 0.559, -3.309}	0.49	2.2
pentane(1)+heptane(2)	WW2010MOH1 = Mohsen-Nia et al. (2010)	305.15	9	JOAC3	3	{0.034, -0.044, -0.196}	0.51	2.2
pentane(1)+heptane(2)	WW2010MOH1 = Mohsen-Nia et al. (2010)	305.15	9	SFF	3	{0.044, 4.061, 16.475}	0.41	2.2
pentane(1)+heptane(2)	WW2010MOH1 = Mohsen-Nia et al. (2010)	318.15	9	EBE	1	{1.218}	2.02	5.35
pentane(1)+heptane(2)	WW2010MOH1 = Mohsen-Nia et al. (2010)	318.15	9	WSD	1	{0.982}	1.99	5.34
pentane(1)+heptane(2)	WW2010MOH1 = Mohsen-Nia et al. (2010)	318.15	9	JOAC1	1	{-0.015}	2.01	5.35
pentane(1)+heptane(2)	WW2010MOH1 = Mohsen-Nia et al. (2010)	318.15	9	BCRG	1	{1.488}	2.03	5.36
pentane(1)+heptane(2)	WW2010MOH1 = Mohsen-Nia et al. (2010)	318.15	9	CW	2	{1.01, -0.106}	0.87	5.34
pentane(1)+heptane(2)	WW2010MOH1 = Mohsen-Nia et al. (2010)	318.15	9	RK2	2	{-0.938, 2.495}	1.68	5.34
pentane(1)+heptane(2)	WW2010MOH1 = Mohsen-Nia et al. (2010)	318.15	9	JOAC2	2	{-0.025, -0.081}	1.72	5.34
pentane(1)+heptane(2)	WW2010MOH1 = Mohsen-Nia et al. (2010)	318.15	9	FLW	2	{2.32, 0.565}	1.31	5.34
pentane(1)+heptane(2)	WW2010MOH1 = Mohsen-Nia et al. (2010)	318.15	9	QYDH	2	{1.544, 1.264}	1.82	5.34
pentane(1)+heptane(2)	WW2010MOH1 = Mohsen-Nia et al. (2010)	318.15	9	SIGMO	2	{-0.037, 1.402}	1.85	5.34
pentane(1)+heptane(2)	WW2010MOH1 = Mohsen-Nia et al. (2010)	318.15	9	RK3	3	{-0.716, 1.583, -3.084}	1.31	5.34
pentane(1)+heptane(2)	WW2010MOH1 = Mohsen-Nia et al. (2010)	318.15	9	JOAC3	3	{-0.004, -0.112, -0.224}	1.34	5.34
pentane(1)+heptane(2)	WW2010MOH1 = Mohsen-Nia et al. (2010)	318.15	9	SFF	3	{0.143, 2.551, 6.501}	1.01	5.34

## Sheet: CASE 3
MIXTURE	REFERENCES	T / K	N-data	model	Nº of coefficients	Coefficients Value	AAD (%)	PDm (%)
hexane(1)+decane(2)	WW86S1 = Srivastava (1986)	303.15	4	EBE	1	{0.789}	0.11	0.33
hexane(1)+decane(2)	WW86S1 = Srivastava (1986)	303.15	4	WSD	1	{1.041}	0.12	0.44
hexane(1)+decane(2)	WW86S1 = Srivastava (1986)	303.15	4	JOAC1	1	{0.099}	0.18	0.52
hexane(1)+decane(2)	WW86S1 = Srivastava (1986)	303.15	4	BCRG	1	{0.616}	0.1	0.29
hexane(1)+decane(2)	WW86S1 = Srivastava (1986)	303.15	4	CW	2	{0.593, 0.188}	0.09	0.3
hexane(1)+decane(2)	WW86S1 = Srivastava (1986)	303.15	4	RK2	2	{1.503, -0.571}	0.1	0.33
hexane(1)+decane(2)	WW86S1 = Srivastava (1986)	303.15	4	JOAC2	2	{0.113, 0.04}	0.11	0.35
hexane(1)+decane(2)	WW86S1 = Srivastava (1986)	303.15	4	FLW	2	{1.569, 0.66}	0.19	0.55
hexane(1)+decane(2)	WW86S1 = Srivastava (1986)	303.15	4	QYDH	2	{0.796, 1.007}	0.11	0.37
hexane(1)+decane(2)	WW86S1 = Srivastava (1986)	303.15	4	SIGMO	2	{7.335, 1.172}	0.28	0.54
hexane(1)+decane(2)	WW86S1 = Srivastava (1986)	303.15	4	RK3	3	{1.231, -1.51, 2.094}	0.06	0.23
hexane(1)+decane(2)	WW86S1 = Srivastava (1986)	303.15	4	JOAC3	3	{0.11, 0.048, 0.03}	0.07	0.27
hexane(1)+decane(2)	WW86S1 = Srivastava (1986)	303.15	4	SFF	3	{-0.22, -0.366, 3.586}	0.07	0.19
decane(1)+hexadecane(2)	WW86S1 = Srivastava (1986)	303.15	4	EBE	1	{0.678}	0.09	0.2
decane(1)+hexadecane(2)	WW86S1 = Srivastava (1986)	303.15	4	WSD	1	{1.033}	0.09	0.13
decane(1)+hexadecane(2)	WW86S1 = Srivastava (1986)	303.15	4	JOAC1	1	{0.073}	0.08	0.16
decane(1)+hexadecane(2)	WW86S1 = Srivastava (1986)	303.15	4	BCRG	1	{0.462}	0.1	0.21
decane(1)+hexadecane(2)	WW86S1 = Srivastava (1986)	303.15	4	CW	2	{-1.745, 0.816}	0.07	0.27
decane(1)+hexadecane(2)	WW86S1 = Srivastava (1986)	303.15	4	RK2	2	{1.616, 0.575}	0.07	0.29
decane(1)+hexadecane(2)	WW86S1 = Srivastava (1986)	303.15	4	JOAC2	2	{0.076, -0.019}	0.08	0.29
decane(1)+hexadecane(2)	WW86S1 = Srivastava (1986)	303.15	4	FLW	2	{1.279, 0.758}	0.11	0.31
decane(1)+hexadecane(2)	WW86S1 = Srivastava (1986)	303.15	4	QYDH	2	{0.78, 1.273}	0.07	0.29
decane(1)+hexadecane(2)	WW86S1 = Srivastava (1986)	303.15	4	SIGMO	2	{0.592, 1.467}	0.07	0.27
decane(1)+hexadecane(2)	WW86S1 = Srivastava (1986)	303.15	4	RK3	3	{1.599, 0.454, -0.181}	0.07	0.29
decane(1)+hexadecane(2)	WW86S1 = Srivastava (1986)	303.15	4	JOAC3	3	{0.075, -0.012, -0.01}	0.08	0.3
decane(1)+hexadecane(2)	WW86S1 = Srivastava (1986)	303.15	4	SFF	3	{-0.489, 0.233, 1.852}	0.07	0.29
heptane(1)+hexadecane(2)	WW79P1 = Pugachevich et al. (1979)	303.15	5	EBE	1	{1.28}	0.3	1
heptane(1)+hexadecane(2)	WW79P1 = Pugachevich et al. (1979)	303.15	5	WSD	1	{0.972}	0.28	1.05
heptane(1)+hexadecane(2)	WW79P1 = Pugachevich et al. (1979)	303.15	5	JOAC1	1	{-0.028}	0.28	1.01
heptane(1)+hexadecane(2)	WW79P1 = Pugachevich et al. (1979)	303.15	5	BCRG	1	{1.628}	0.3	0.99
heptane(1)+hexadecane(2)	WW79P1 = Pugachevich et al. (1979)	303.15	5	CW	2	{-0.045, -0.261}	0.27	1.03
heptane(1)+hexadecane(2)	WW79P1 = Pugachevich et al. (1979)	303.15	5	RK2	2	{-1.909, -0.042}	0.27	1.03
heptane(1)+hexadecane(2)	WW79P1 = Pugachevich et al. (1979)	303.15	5	JOAC2	2	{-0.03, -0.006}	0.28	1.04
heptane(1)+hexadecane(2)	WW79P1 = Pugachevich et al. (1979)	303.15	5	FLW	2	{0.663, 1.427}	0.21	0.75
heptane(1)+hexadecane(2)	WW79P1 = Pugachevich et al. (1979)	303.15	5	QYDH	2	{1.32, 1.026}	0.28	1.09
heptane(1)+hexadecane(2)	WW79P1 = Pugachevich et al. (1979)	303.15	5	SIGMO	2	{0.608, 0.987}	0.3	0.97
heptane(1)+hexadecane(2)	WW79P1 = Pugachevich et al. (1979)	303.15	5	RK3	3	{-1.684, -0.254, -0.879}	0.2	0.85
heptane(1)+hexadecane(2)	WW79P1 = Pugachevich et al. (1979)	303.15	5	JOAC3	3	{-0.02, -0.006, -0.063}	0.2	0.76
heptane(1)+hexadecane(2)	WW79P1 = Pugachevich et al. (1979)	303.15	5	SFF	3	{0.748, -0.497, 0.011}	0.27	1.02
heptane(1)+hexadecane(2)	WW79P1 = Pugachevich et al. (1979)	333.15	5	EBE	1	{1.189}	0.33	0.6
heptane(1)+hexadecane(2)	WW79P1 = Pugachevich et al. (1979)	333.15	5	WSD	1	{0.985}	0.3	0.54
heptane(1)+hexadecane(2)	WW79P1 = Pugachevich et al. (1979)	333.15	5	JOAC1	1	{0.009}	0.32	0.57
heptane(1)+hexadecane(2)	WW79P1 = Pugachevich et al. (1979)	333.15	5	BCRG	1	{1.416}	0.34	0.61
heptane(1)+hexadecane(2)	WW79P1 = Pugachevich et al. (1979)	333.15	5	CW	2	{0.653, -0.117}	0.08	0.16
heptane(1)+hexadecane(2)	WW79P1 = Pugachevich et al. (1979)	333.15	5	RK2	2	{-1.397, 1.038}	0.06	0.22
heptane(1)+hexadecane(2)	WW79P1 = Pugachevich et al. (1979)	333.15	5	JOAC2	2	{0.005, -0.058}	0.08	0.27
heptane(1)+hexadecane(2)	WW79P1 = Pugachevich et al. (1979)	333.15	5	FLW	2	{1.549, 0.781}	0.16	0.37
heptane(1)+hexadecane(2)	WW79P1 = Pugachevich et al. (1979)	333.15	5	QYDH	2	{1.347, 1.146}	0.18	0.55
heptane(1)+hexadecane(2)	WW79P1 = Pugachevich et al. (1979)	333.15	5	SIGMO	2	{0.157, 1.229}	0.21	0.66
heptane(1)+hexadecane(2)	WW79P1 = Pugachevich et al. (1979)	333.15	5	RK3	3	{-1.363, 0.997, -0.104}	0.05	0.19
heptane(1)+hexadecane(2)	WW79P1 = Pugachevich et al. (1979)	333.15	5	JOAC3	3	{0.009, -0.058, -0.027}	0.05	0.15
heptane(1)+hexadecane(2)	WW79P1 = Pugachevich et al. (1979)	333.15	5	SFF	3	{0.079, 0.252, 1.422}	0.05	0.17
heptane(1)+hexadecane(2)	WW79P1 = Pugachevich et al. (1979)	373.15	5	EBE	1	{1.266}	0.88	1.77
heptane(1)+hexadecane(2)	WW79P1 = Pugachevich et al. (1979)	373.15	5	WSD	1	{0.972}	0.79	1.65
heptane(1)+hexadecane(2)	WW79P1 = Pugachevich et al. (1979)	373.15	5	JOAC1	1	{0.01}	0.85	1.72
heptane(1)+hexadecane(2)	WW79P1 = Pugachevich et al. (1979)	373.15	5	BCRG	1	{1.607}	0.91	1.8
heptane(1)+hexadecane(2)	WW79P1 = Pugachevich et al. (1979)	373.15	5	CW	2	{0.812, -0.14}	0.09	0.15
heptane(1)+hexadecane(2)	WW79P1 = Pugachevich et al. (1979)	373.15	5	RK2	2	{-2.107, 1.716}	0.18	0.6
heptane(1)+hexadecane(2)	WW79P1 = Pugachevich et al. (1979)	373.15	5	JOAC2	2	{-0.003, -0.119}	0.26	0.73
heptane(1)+hexadecane(2)	WW79P1 = Pugachevich et al. (1979)	373.15	5	FLW	2	{1.87, 0.754}	0.13	0.39
heptane(1)+hexadecane(2)	WW79P1 = Pugachevich et al. (1979)	373.15	5	QYDH	2	{1.559, 1.232}	0.46	0.95
heptane(1)+hexadecane(2)	WW79P1 = Pugachevich et al. (1979)	373.15	5	SIGMO	2	{-0.027, 1.358}	0.53	0.99
heptane(1)+hexadecane(2)	WW79P1 = Pugachevich et al. (1979)	373.15	5	RK3	3	{-1.97, 1.904, -1.327}	0.08	0.22
heptane(1)+hexadecane(2)	WW79P1 = Pugachevich et al. (1979)	373.15	5	JOAC3	3	{0.01, -0.119, -0.084}	0.11	0.37
heptane(1)+hexadecane(2)	WW79P1 = Pugachevich et al. (1979)	373.15	5	SFF	3	{0.143, 0.484, 2.406}	0.06	0.18
heptane(1)+undecane(2)	WW79P1 = Pugachevich et al. (1979)	303.15	5	EBE	1	{1.142}	0.12	0.35
heptane(1)+undecane(2)	WW79P1 = Pugachevich et al. (1979)	303.15	5	WSD	1	{0.992}	0.14	0.34
heptane(1)+undecane(2)	WW79P1 = Pugachevich et al. (1979)	303.15	5	JOAC1	1	{-0.006}	0.12	0.34
heptane(1)+undecane(2)	WW79P1 = Pugachevich et al. (1979)	303.15	5	BCRG	1	{1.304}	0.12	0.35
heptane(1)+undecane(2)	WW79P1 = Pugachevich et al. (1979)	303.15	5	CW	2	{-0.485, -0.164}	0.12	0.38
heptane(1)+undecane(2)	WW79P1 = Pugachevich et al. (1979)	303.15	5	RK2	2	{-0.605, -0.09}	0.12	0.37
heptane(1)+undecane(2)	WW79P1 = Pugachevich et al. (1979)	303.15	5	JOAC2	2	{-0.006, 0.003}	0.12	0.37
heptane(1)+undecane(2)	WW79P1 = Pugachevich et al. (1979)	303.15	5	FLW	2	{1.19, 0.88}	0.14	0.36
heptane(1)+undecane(2)	WW79P1 = Pugachevich et al. (1979)	303.15	5	QYDH	2	{1.127, 0.981}	0.11	0.37
heptane(1)+undecane(2)	WW79P1 = Pugachevich et al. (1979)	303.15	5	SIGMO	2	{1.082, 0.967}	0.11	0.37
heptane(1)+undecane(2)	WW79P1 = Pugachevich et al. (1979)	303.15	5	RK3	3	{-0.474, 0.067, -1.215}	0.06	0.15
heptane(1)+undecane(2)	WW79P1 = Pugachevich et al. (1979)	303.15	5	JOAC3	3	{-0.001, -0.007, -0.055}	0.06	0.18
heptane(1)+undecane(2)	WW79P1 = Pugachevich et al. (1979)	303.15	5	SFF	3	{0.193, -0.077, 0.341}	0.11	0.37
heptane(1)+undecane(2)	WW79P1 = Pugachevich et al. (1979)	333.15	5	EBE	1	{1.076}	0.3	0.61
heptane(1)+undecane(2)	WW79P1 = Pugachevich et al. (1979)	333.15	5	WSD	1	{0.999}	0.3	0.61
heptane(1)+undecane(2)	WW79P1 = Pugachevich et al. (1979)	333.15	5	JOAC1	1	{0.014}	0.3	0.6
heptane(1)+undecane(2)	WW79P1 = Pugachevich et al. (1979)	333.15	5	BCRG	1	{1.158}	0.3	0.61
heptane(1)+undecane(2)	WW79P1 = Pugachevich et al. (1979)	333.15	5	CW	2	{0.99999999999999514432302981804488226075`25., -0.033}	0.13	0.39
heptane(1)+undecane(2)	WW79P1 = Pugachevich et al. (1979)	333.15	5	RK2	2	{-0.35, 0.674}	0.14	0.27
heptane(1)+undecane(2)	WW79P1 = Pugachevich et al. (1979)	333.15	5	JOAC2	2	{0.014, -0.034}	0.14	0.32
heptane(1)+undecane(2)	WW79P1 = Pugachevich et al. (1979)	333.15	5	FLW	2	{1.627, 0.685}	0.22	0.59
heptane(1)+undecane(2)	WW79P1 = Pugachevich et al. (1979)	333.15	5	QYDH	2	{1.19, 1.145}	0.12	0.38
heptane(1)+undecane(2)	WW79P1 = Pugachevich et al. (1979)	333.15	5	SIGMO	2	{0.347, 1.194}	0.11	0.43
heptane(1)+undecane(2)	WW79P1 = Pugachevich et al. (1979)	333.15	5	RK3	3	{-0.35, 0.871, -0.494}	0.13	0.37
heptane(1)+undecane(2)	WW79P1 = Pugachevich et al. (1979)	333.15	5	JOAC3	3	{0.014, -0.025, 0.022}	0.14	0.53
heptane(1)+undecane(2)	WW79P1 = Pugachevich et al. (1979)	333.15	5	SFF	3	{-0.518, 0.725, 0.294}	0.12	0.28
heptane(1)+undecane(2)	WW79P1 = Pugachevich et al. (1979)	373.15	5	EBE	1	{1.112}	1.01	1.96
heptane(1)+undecane(2)	WW79P1 = Pugachevich et al. (1979)	373.15	5	WSD	1	{0.996}	1	1.94
heptane(1)+undecane(2)	WW79P1 = Pugachevich et al. (1979)	373.15	5	JOAC1	1	{0.021}	1	1.95
heptane(1)+undecane(2)	WW79P1 = Pugachevich et al. (1979)	373.15	5	BCRG	1	{1.236}	1.01	1.97
heptane(1)+undecane(2)	WW79P1 = Pugachevich et al. (1979)	373.15	5	CW	2	{0.99999999999999999999`25., -0.065}	0.48	1.34
heptane(1)+undecane(2)	WW79P1 = Pugachevich et al. (1979)	373.15	5	RK2	2	{-0.527, 1.473}	0.38	1.02
heptane(1)+undecane(2)	WW79P1 = Pugachevich et al. (1979)	373.15	5	JOAC2	2	{0.021, -0.1}	0.38	1.13
heptane(1)+undecane(2)	WW79P1 = Pugachevich et al. (1979)	373.15	5	FLW	2	{2.374, 0.552}	0.39	1.08
heptane(1)+undecane(2)	WW79P1 = Pugachevich et al. (1979)	373.15	5	QYDH	2	{1.428, 1.361}	0.36	1.25
heptane(1)+undecane(2)	WW79P1 = Pugachevich et al. (1979)	373.15	5	SIGMO	2	{-0.037, 1.535}	0.36	1.29
heptane(1)+undecane(2)	WW79P1 = Pugachevich et al. (1979)	373.15	5	RK3	3	{-0.527, 2.032, -1.399}	0.36	1.04
heptane(1)+undecane(2)	WW79P1 = Pugachevich et al. (1979)	373.15	5	JOAC3	3	{0.021, -0.096, -0.01}	0.38	1.1
heptane(1)+undecane(2)	WW79P1 = Pugachevich et al. (1979)	373.15	5	SFF	3	{-0.06, 0.869, 2.407}	0.34	1
hexadecane(1)+octacosane(2)	Yang and Wu (2022)	348.25	3	EBE	1	{2.239}	1.08	1.96
hexadecane(1)+octacosane(2)	Yang and Wu (2022)	348.25	3	WSD	1	{0.95}	0.77	1.44
hexadecane(1)+octacosane(2)	Yang and Wu (2022)	348.25	3	JOAC1	1	{-0.099}	0.8	1.47
hexadecane(1)+octacosane(2)	Yang and Wu (2022)	348.25	3	BCRG	1	{3.653}	1.12	2.16
hexadecane(1)+octacosane(2)	Yang and Wu (2022)	348.25	3	CW	2	{0.957, -0.365}	0.04	0.1
hexadecane(1)+octacosane(2)	Yang and Wu (2022)	348.25	3	RK2	2	{-2.524, 3.521}	0.34	1.01
hexadecane(1)+octacosane(2)	Yang and Wu (2022)	348.25	3	JOAC2	2	{-0.101, -0.157}	0.35	1.04
hexadecane(1)+octacosane(2)	Yang and Wu (2022)	348.25	3	FLW	2	{2.277, 0.523}	0.1	0.27
hexadecane(1)+octacosane(2)	Yang and Wu (2022)	348.25	3	QYDH	2	{5.477, 2.128}	0.51	1.52
hexadecane(1)+octacosane(2)	Yang and Wu (2022)	348.25	3	SIGMO	2	{-0.414, 2.605}	0.52	1.54
hexadecane(1)+octacosane(2)	Yang and Wu (2022)	348.25	3	RK3	3	{-1.691, 1.591, -4.639}	0	0
hexadecane(1)+octacosane(2)	Yang and Wu (2022)	348.25	3	JOAC3	3	{-0.064, -0.072, -0.207}	0.01	0.01
hexadecane(1)+octacosane(2)	Yang and Wu (2022)	348.25	3	SFF	3	{0.573, 2.856, 4.584}	0	0
hexadecane(1)+octacosane(2)	Yang and Wu (2022)	372.76	3	EBE	1	{2.234}	0.88	1.84
hexadecane(1)+octacosane(2)	Yang and Wu (2022)	372.76	3	WSD	1	{0.959}	0.68	1.69
hexadecane(1)+octacosane(2)	Yang and Wu (2022)	372.76	3	JOAC1	1	{-0.081}	0.71	1.71
hexadecane(1)+octacosane(2)	Yang and Wu (2022)	372.76	3	BCRG	1	{3.671}	0.93	2.06
hexadecane(1)+octacosane(2)	Yang and Wu (2022)	372.76	3	CW	2	{0.99999999999955333543051780665412077486`25., -0.26}	0.18	0.46
hexadecane(1)+octacosane(2)	Yang and Wu (2022)	372.76	3	RK2	2	{-2.408, 3.11}	0.48	1.44
hexadecane(1)+octacosane(2)	Yang and Wu (2022)	372.76	3	JOAC2	2	{-0.104, -0.153}	0.51	1.49
hexadecane(1)+octacosane(2)	Yang and Wu (2022)	372.76	3	FLW	2	{2.143, 0.559}	0.25	0.76
hexadecane(1)+octacosane(2)	Yang and Wu (2022)	372.76	3	QYDH	2	{2.768, 1.474}	0.57	1.72
hexadecane(1)+octacosane(2)	Yang and Wu (2022)	372.76	3	SIGMO	2	{-0.323, 1.72}	0.57	1.74
hexadecane(1)+octacosane(2)	Yang and Wu (2022)	372.76	3	RK3	3	{-1.314, 0.573, -6.098}	0	0
hexadecane(1)+octacosane(2)	Yang and Wu (2022)	372.76	3	JOAC3	3	{-0.052, -0.031, -0.293}	0.03	0.03
hexadecane(1)+octacosane(2)	Yang and Wu (2022)	372.76	3	SFF	3	{0.57, 4.106, 7.776}	0	0
hexadecane(1)+octacosane(2)	Lenahan et al. (2021)	373.15	3	EBE	1	{4.264}	0.21	0.45
hexadecane(1)+octacosane(2)	Lenahan et al. (2021)	373.15	3	WSD	1	{0.928}	0.53	1.46
hexadecane(1)+octacosane(2)	Lenahan et al. (2021)	373.15	3	JOAC1	1	{-0.144}	0.48	1.33
hexadecane(1)+octacosane(2)	Lenahan et al. (2021)	373.15	3	BCRG	1	{20.673}	0.26	0.67
hexadecane(1)+octacosane(2)	Lenahan et al. (2021)	373.15	3	CW	2	{-4.325, -3.741}	0.2	0.61
hexadecane(1)+octacosane(2)	Lenahan et al. (2021)	373.15	3	RK2	2	{-4.064, -1.866}	0.3	0.9
hexadecane(1)+octacosane(2)	Lenahan et al. (2021)	373.15	3	JOAC2	2	{-0.177, 0.075}	0.28	0.85
hexadecane(1)+octacosane(2)	Lenahan et al. (2021)	373.15	3	FLW	2	{0.571, 1.913}	0.06	0.16
hexadecane(1)+octacosane(2)	Lenahan et al. (2021)	373.15	3	QYDH	2	{3.559, 0.869}	0.19	0.57
hexadecane(1)+octacosane(2)	Lenahan et al. (2021)	373.15	3	SIGMO	2	{-0.344, 0.799}	0.19	0.57
hexadecane(1)+octacosane(2)	Lenahan et al. (2021)	373.15	3	RK3	3	{-3.289, -1.867, -3.1}	0	0
hexadecane(1)+octacosane(2)	Lenahan et al. (2021)	373.15	3	JOAC3	3	{-0.144, 0.075, -0.137}	0.03	0.03
hexadecane(1)+octacosane(2)	Lenahan et al. (2021)	373.15	3	SFF	3	{5.2, -4.271, 0.164}	0.22	0.66
hexadecane(1)+octacosane(2)	Lenahan et al. (2021)	398.15	3	EBE	1	{2.197}	0.62	1.56
hexadecane(1)+octacosane(2)	Lenahan et al. (2021)	398.15	3	WSD	1	{0.944}	0.42	1.05
hexadecane(1)+octacosane(2)	Lenahan et al. (2021)	398.15	3	JOAC1	1	{-0.105}	0.44	1.18
hexadecane(1)+octacosane(2)	Lenahan et al. (2021)	398.15	3	BCRG	1	{5.255}	0.71	1.63
hexadecane(1)+octacosane(2)	Lenahan et al. (2021)	398.15	3	CW	2	{0.835, -0.436}	0.23	0.7
hexadecane(1)+octacosane(2)	Lenahan et al. (2021)	398.15	3	RK2	2	{-2.915, 1.05}	0.3	0.89
hexadecane(1)+octacosane(2)	Lenahan et al. (2021)	398.15	3	JOAC2	2	{-0.136, -0.063}	0.31	0.91
hexadecane(1)+octacosane(2)	Lenahan et al. (2021)	398.15	3	FLW	2	{1.495, 0.791}	0.08	0.24
hexadecane(1)+octacosane(2)	Lenahan et al. (2021)	398.15	3	QYDH	2	{2.393, 1.123}	0.49	1.47
hexadecane(1)+octacosane(2)	Lenahan et al. (2021)	398.15	3	SIGMO	2	{-0.213, 1.181}	0.5	1.49
hexadecane(1)+octacosane(2)	Lenahan et al. (2021)	398.15	3	RK3	3	{-2.207, 1.048, -2.83}	0	0
hexadecane(1)+octacosane(2)	Lenahan et al. (2021)	398.15	3	JOAC3	3	{-0.099, -0.063, -0.146}	0.01	0.01
hexadecane(1)+octacosane(2)	Lenahan et al. (2021)	398.15	3	SFF	3	{0.808, 1.243, 4.481}	0.16	0.43
hexadecane(1)+octacosane(2)	Lenahan et al. (2021)	398.44	3	EBE	1	{1.858}	0.62	1.56
hexadecane(1)+octacosane(2)	Lenahan et al. (2021)	398.44	3	WSD	1	{0.962}	0.42	1.05
hexadecane(1)+octacosane(2)	Lenahan et al. (2021)	398.44	3	JOAC1	1	{-0.073}	0.44	1.18
hexadecane(1)+octacosane(2)	Lenahan et al. (2021)	398.44	3	BCRG	1	{3.724}	0.71	1.63
hexadecane(1)+octacosane(2)	Lenahan et al. (2021)	398.44	3	CW	2	{0.99999999999999999999`25., -0.202}	0.23	0.7
hexadecane(1)+octacosane(2)	Lenahan et al. (2021)	398.44	3	RK2	2	{-1.944, 4.116}	0.3	0.89
hexadecane(1)+octacosane(2)	Lenahan et al. (2021)	398.44	3	JOAC2	2	{-0.089, -0.22}	0.31	0.91
hexadecane(1)+octacosane(2)	Lenahan et al. (2021)	398.44	3	FLW	2	{2.801, 0.446}	0.08	0.24
hexadecane(1)+octacosane(2)	Lenahan et al. (2021)	398.44	3	QYDH	2	{2.457, 1.617}	0.49	1.47
hexadecane(1)+octacosane(2)	Lenahan et al. (2021)	398.44	3	SIGMO	2	{-0.284, 1.923}	0.5	1.49
hexadecane(1)+octacosane(2)	Lenahan et al. (2021)	398.44	3	RK3	3	{-0.773, 1.403, -6.521}	0	0
hexadecane(1)+octacosane(2)	Lenahan et al. (2021)	398.44	3	JOAC3	3	{-0.027, -0.074, -0.352}	0.01	0.01
hexadecane(1)+octacosane(2)	Lenahan et al. (2021)	398.44	3	SFF	3	{0.278, 3.555, 5.638}	0.16	0.43
hexadecane(1)+octacosane(2)	Yang and Wu (2022)	423.04	3	EBE	1	{1.392}	1.03	2.38
hexadecane(1)+octacosane(2)	Yang and Wu (2022)	423.04	3	WSD	1	{0.977}	0.97	2.33
hexadecane(1)+octacosane(2)	Yang and Wu (2022)	423.04	3	JOAC1	1	{-0.04}	0.99	2.35
hexadecane(1)+octacosane(2)	Yang and Wu (2022)	423.04	3	BCRG	1	{1.967}	1.04	2.39
hexadecane(1)+octacosane(2)	Yang and Wu (2022)	423.04	3	CW	2	{0.99999999999999999999`25., -0.114}	0.47	1.34
hexadecane(1)+octacosane(2)	Yang and Wu (2022)	423.04	3	RK2	2	{-1.466, 3.615}	0.63	1.9
hexadecane(1)+octacosane(2)	Yang and Wu (2022)	423.04	3	JOAC2	2	{-0.069, -0.212}	0.66	1.98
hexadecane(1)+octacosane(2)	Yang and Wu (2022)	423.04	3	FLW	2	{2.767, 0.452}	0.27	0.78
hexadecane(1)+octacosane(2)	Yang and Wu (2022)	423.04	3	QYDH	2	{1.602, 1.312}	0.74	2.22
hexadecane(1)+octacosane(2)	Yang and Wu (2022)	423.04	3	SIGMO	2	{-0.082, 1.483}	0.75	2.24
hexadecane(1)+octacosane(2)	Yang and Wu (2022)	423.04	3	RK3	3	{-0.263, 0.827, -6.702}	0	0
hexadecane(1)+octacosane(2)	Yang and Wu (2022)	423.04	3	JOAC3	3	{0.002, -0.047, -0.396}	0	0.01
hexadecane(1)+octacosane(2)	Yang and Wu (2022)	423.04	3	SFF	3	{0.16, 3.723, 7.043}	0	0
hexadecane(1)+octacosane(2)	Lenahan et al. (2021)	423.15	3	EBE	1	{1.32}	0.16	0.3
hexadecane(1)+octacosane(2)	Lenahan et al. (2021)	423.15	3	WSD	1	{0.98}	0.2	0.36
hexadecane(1)+octacosane(2)	Lenahan et al. (2021)	423.15	3	JOAC1	1	{-0.033}	0.18	0.32
hexadecane(1)+octacosane(2)	Lenahan et al. (2021)	423.15	3	BCRG	1	{1.75}	0.14	0.27
hexadecane(1)+octacosane(2)	Lenahan et al. (2021)	423.15	3	CW	2	{-2.935, -0.681}	0.01	0.02
hexadecane(1)+octacosane(2)	Lenahan et al. (2021)	423.15	3	RK2	2	{-0.942, -0.586}	0.03	0.1
hexadecane(1)+octacosane(2)	Lenahan et al. (2021)	423.15	3	JOAC2	2	{-0.037, 0.028}	0.05	0.11
hexadecane(1)+octacosane(2)	Lenahan et al. (2021)	423.15	3	FLW	2	{0.555, 1.697}	0.24	0.46
hexadecane(1)+octacosane(2)	Lenahan et al. (2021)	423.15	3	QYDH	2	{1.198, 0.87}	0.01	0.03
hexadecane(1)+octacosane(2)	Lenahan et al. (2021)	423.15	3	SIGMO	2	{4.431, 0.814}	0.02	0.05
hexadecane(1)+octacosane(2)	Lenahan et al. (2021)	423.15	3	RK3	3	{-0.867, -0.586, -0.296}	0	0
hexadecane(1)+octacosane(2)	Lenahan et al. (2021)	423.15	3	JOAC3	3	{-0.033, 0.028, -0.014}	0.01	0.01
hexadecane(1)+octacosane(2)	Lenahan et al. (2021)	423.15	3	SFF	3	{0.733, -0.589, 0.387}	0.01	0.03
hexadecane(1)+octacosane(2)	Yang and Wu (2022)	448.17	3	EBE	1	{1.109}	1.01	1.97
hexadecane(1)+octacosane(2)	Yang and Wu (2022)	448.17	3	WSD	1	{0.995}	1.01	1.97
hexadecane(1)+octacosane(2)	Yang and Wu (2022)	448.17	3	JOAC1	1	{-0.001}	1.01	1.96
hexadecane(1)+octacosane(2)	Yang and Wu (2022)	448.17	3	BCRG	1	{1.232}	1.01	1.97
hexadecane(1)+octacosane(2)	Yang and Wu (2022)	448.17	3	CW	2	{0.99999999999999999999`25., -0.037}	0.81	1.58
hexadecane(1)+octacosane(2)	Yang and Wu (2022)	448.17	3	RK2	2	{-0.402, 3.189}	0.44	1.32
hexadecane(1)+octacosane(2)	Yang and Wu (2022)	448.17	3	JOAC2	2	{-0.008, -0.202}	0.48	1.43
hexadecane(1)+octacosane(2)	Yang and Wu (2022)	448.17	3	FLW	2	{3.192, 0.392}	0.02	0.02
hexadecane(1)+octacosane(2)	Yang and Wu (2022)	448.17	3	QYDH	2	{1.35, 1.434}	0.55	1.65
hexadecane(1)+octacosane(2)	Yang and Wu (2022)	448.17	3	SIGMO	2	{-0.042, 1.662}	0.56	1.69
hexadecane(1)+octacosane(2)	Yang and Wu (2022)	448.17	3	RK3	3	{0.359, 1.426, -4.238}	0	0
hexadecane(1)+octacosane(2)	Yang and Wu (2022)	448.17	3	JOAC3	3	{0.043, -0.083, -0.286}	0.01	0.01
hexadecane(1)+octacosane(2)	Yang and Wu (2022)	448.17	3	SFF	3	{-0.152, 2.056, 4.624}	0	0
hexadecane(1)+octacosane(2)	Lenahan et al. (2021)	473.15	3	EBE	1	{0.603}	0.45	0.73
hexadecane(1)+octacosane(2)	Lenahan et al. (2021)	473.15	3	WSD	1	{1.06}	0.36	0.93
hexadecane(1)+octacosane(2)	Lenahan et al. (2021)	473.15	3	JOAC1	1	{0.132}	0.35	0.93
hexadecane(1)+octacosane(2)	Lenahan et al. (2021)	473.15	3	BCRG	1	{0.341}	0.5	0.99
hexadecane(1)+octacosane(2)	Lenahan et al. (2021)	473.15	3	CW	2	{-0.166, 0.459}	0.34	1.03
hexadecane(1)+octacosane(2)	Lenahan et al. (2021)	473.15	3	RK2	2	{1.518, 0.116}	0.34	1.03
hexadecane(1)+octacosane(2)	Lenahan et al. (2021)	473.15	3	JOAC2	2	{0.129, 0.006}	0.34	1
hexadecane(1)+octacosane(2)	Lenahan et al. (2021)	473.15	3	FLW	2	{0.857, 0.999}	0.06	0.16
hexadecane(1)+octacosane(2)	Lenahan et al. (2021)	473.15	3	QYDH	2	{0.711, 1.119}	0.36	1.07
hexadecane(1)+octacosane(2)	Lenahan et al. (2021)	473.15	3	SIGMO	2	{4.373, 1.374}	0.42	0.84
hexadecane(1)+octacosane(2)	Lenahan et al. (2021)	473.15	3	RK3	3	{2.157, 0.115, -2.556}	0	0
hexadecane(1)+octacosane(2)	Lenahan et al. (2021)	473.15	3	JOAC3	3	{0.169, 0.007, -0.163}	0.01	0.01
hexadecane(1)+octacosane(2)	Lenahan et al. (2021)	473.15	3	SFF	3	{-0.456, 0.145, 3.923}	0.32	0.9
hexadecane(1)+octacosane(2)	Yang and Wu (2022)	473.43	3	EBE	1	{0.836}	0.91	1.96
hexadecane(1)+octacosane(2)	Yang and Wu (2022)	473.43	3	WSD	1	{1.028}	0.91	1.9
hexadecane(1)+octacosane(2)	Yang and Wu (2022)	473.43	3	JOAC1	1	{0.068}	0.9	1.8
hexadecane(1)+octacosane(2)	Yang and Wu (2022)	473.43	3	BCRG	1	{0.695}	0.91	1.98
hexadecane(1)+octacosane(2)	Yang and Wu (2022)	473.43	3	CW	2	{-0.315, 0.195}	0.9	1.83
hexadecane(1)+octacosane(2)	Yang and Wu (2022)	473.43	3	RK2	2	{0.087, 2.044}	0.84	2.52
hexadecane(1)+octacosane(2)	Yang and Wu (2022)	473.43	3	JOAC2	2	{0.031, -0.141}	0.87	2.61
hexadecane(1)+octacosane(2)	Yang and Wu (2022)	473.43	3	FLW	2	{2.629, 0.457}	0.52	1.55
hexadecane(1)+octacosane(2)	Yang and Wu (2022)	473.43	3	QYDH	2	{0.889, 1.062}	0.91	1.76
hexadecane(1)+octacosane(2)	Yang and Wu (2022)	473.43	3	SIGMO	2	{1.831, 1.123}	0.91	1.72
hexadecane(1)+octacosane(2)	Yang and Wu (2022)	473.43	3	RK3	3	{1.411, -1.024, -7.376}	0	0
hexadecane(1)+octacosane(2)	Yang and Wu (2022)	473.43	3	JOAC3	3	{0.125, 0.077, -0.523}	0	0
hexadecane(1)+octacosane(2)	Yang and Wu (2022)	473.43	3	SFF	3	{-0.405, 3.045, 7.89}	0.41	1.22
hexadecane(1)+octacosane(2)	Yang and Wu (2022)	498.1	3	EBE	1	{0.605}	0.61	1.56
hexadecane(1)+octacosane(2)	Yang and Wu (2022)	498.1	3	WSD	1	{1.082}	0.46	1.19
hexadecane(1)+octacosane(2)	Yang and Wu (2022)	498.1	3	JOAC1	1	{0.175}	0.44	0.86
hexadecane(1)+octacosane(2)	Yang and Wu (2022)	498.1	3	BCRG	1	{0.366}	0.68	1.69
hexadecane(1)+octacosane(2)	Yang and Wu (2022)	498.1	3	CW	2	{-0.339, 0.566}	0.45	0.93
hexadecane(1)+octacosane(2)	Yang and Wu (2022)	498.1	3	RK2	2	{1.611, 1.154}	0.41	1.23
hexadecane(1)+octacosane(2)	Yang and Wu (2022)	498.1	3	JOAC2	2	{0.157, -0.068}	0.44	1.29
hexadecane(1)+octacosane(2)	Yang and Wu (2022)	498.1	3	FLW	2	{1.022, 0.85}	0.3	0.85
hexadecane(1)+octacosane(2)	Yang and Wu (2022)	498.1	3	QYDH	2	{0.879, 1.424}	0.43	1.29
hexadecane(1)+octacosane(2)	Yang and Wu (2022)	498.1	3	SIGMO	2	{0.325, 1.589}	0.45	1.14
hexadecane(1)+octacosane(2)	Yang and Wu (2022)	498.1	3	RK3	3	{2.195, -0.199, -3.254}	0	0
hexadecane(1)+octacosane(2)	Yang and Wu (2022)	498.1	3	JOAC3	3	{0.203, 0.039, -0.255}	0	0.01
hexadecane(1)+octacosane(2)	Yang and Wu (2022)	498.1	3	SFF	3	{-0.532, 4.706, 15.508}	0.06	0.17
hexadecane(1)+octacosane(2)	Lenahan et al. (2021)	523.15	3	EBE	1	{0.53}	0.81	1.33
hexadecane(1)+octacosane(2)	Lenahan et al. (2021)	523.15	3	WSD	1	{1.121}	0.41	0.87
hexadecane(1)+octacosane(2)	Lenahan et al. (2021)	523.15	3	JOAC1	1	{0.268}	0.2	0.45
hexadecane(1)+octacosane(2)	Lenahan et al. (2021)	523.15	3	BCRG	1	{0.269}	0.95	1.44
hexadecane(1)+octacosane(2)	Lenahan et al. (2021)	523.15	3	CW	2	{-0.893, 0.941}	0.1	0.3
hexadecane(1)+octacosane(2)	Lenahan et al. (2021)	523.15	3	RK2	2	{2.685, 0.829}	0.14	0.43
hexadecane(1)+octacosane(2)	Lenahan et al. (2021)	523.15	3	JOAC2	2	{0.28, -0.024}	0.15	0.44
hexadecane(1)+octacosane(2)	Lenahan et al. (2021)	523.15	3	FLW	2	{1.596, 0.597}	0.63	1.85
hexadecane(1)+octacosane(2)	Lenahan et al. (2021)	523.15	3	QYDH	2	{0.694, 1.484}	0.16	0.48
hexadecane(1)+octacosane(2)	Lenahan et al. (2021)	523.15	3	SIGMO	2	{0.473, 1.714}	0.11	0.34
hexadecane(1)+octacosane(2)	Lenahan et al. (2021)	523.15	3	RK3	3	{2.472, 0.829, 0.852}	0	0
hexadecane(1)+octacosane(2)	Lenahan et al. (2021)	523.15	3	JOAC3	3	{0.263, -0.024, 0.07}	0.01	0.01
hexadecane(1)+octacosane(2)	Lenahan et al. (2021)	523.15	3	SFF	3	{-0.943, 0.492, 0.757}	0.14	0.31
hexadecane(1)+octacosane(2)	Yang and Wu (2022)	523.34	3	EBE	1	{0.479}	0.19	0.38
hexadecane(1)+octacosane(2)	Yang and Wu (2022)	523.34	3	WSD	1	{1.15}	0.38	0.8
hexadecane(1)+octacosane(2)	Yang and Wu (2022)	523.34	3	JOAC1	1	{0.331}	0.71	1.42
hexadecane(1)+octacosane(2)	Yang and Wu (2022)	523.34	3	BCRG	1	{0.225}	0.38	0.74
hexadecane(1)+octacosane(2)	Yang and Wu (2022)	523.34	3	CW	2	{0.385, 0.575}	0.05	0.15
hexadecane(1)+octacosane(2)	Yang and Wu (2022)	523.34	3	RK2	2	{2.902, -0.767}	0.02	0.08
hexadecane(1)+octacosane(2)	Yang and Wu (2022)	523.34	3	JOAC2	2	{0.302, 0.121}	0.03	0.09
hexadecane(1)+octacosane(2)	Yang and Wu (2022)	523.34	3	FLW	2	{1.963, 0.486}	0.14	0.25
hexadecane(1)+octacosane(2)	Yang and Wu (2022)	523.34	3	QYDH	2	{0.514, 1.104}	0.07	0.2
hexadecane(1)+octacosane(2)	Yang and Wu (2022)	523.34	3	SIGMO	2	{4.516, 1.738}	0.53	1.13
hexadecane(1)+octacosane(2)	Yang and Wu (2022)	523.34	3	RK3	3	{2.93, -0.833, -0.155}	0	0
hexadecane(1)+octacosane(2)	Yang and Wu (2022)	523.34	3	JOAC3	3	{0.299, 0.113, 0.019}	0	0
hexadecane(1)+octacosane(2)	Yang and Wu (2022)	523.34	3	SFF	3	{-0.48, -0.43, 0.814}	0.01	0.02
hexadecane(1)+octacosane(2)	Yang and Wu (2022)	548.46	3	EBE	1	{0.407}	0.57	1.27
hexadecane(1)+octacosane(2)	Yang and Wu (2022)	548.46	3	WSD	1	{1.222}	0.43	0.93
hexadecane(1)+octacosane(2)	Yang and Wu (2022)	548.46	3	JOAC1	1	{0.487}	1.02	1.6
hexadecane(1)+octacosane(2)	Yang and Wu (2022)	548.46	3	BCRG	1	{0.158}	0.92	1.61
hexadecane(1)+octacosane(2)	Yang and Wu (2022)	548.46	3	CW	2	{0.329, 0.8}	0.18	0.55
hexadecane(1)+octacosane(2)	Yang and Wu (2022)	548.46	3	RK2	2	{4.094, -0.879}	0.21	0.64
hexadecane(1)+octacosane(2)	Yang and Wu (2022)	548.46	3	JOAC2	2	{0.476, 0.193}	0.33	0.97
hexadecane(1)+octacosane(2)	Yang and Wu (2022)	548.46	3	FLW	2	{1.274, 0.588}	0.39	1.14
hexadecane(1)+octacosane(2)	Yang and Wu (2022)	548.46	3	QYDH	2	{0.454, 1.356}	0.17	0.5
hexadecane(1)+octacosane(2)	Yang and Wu (2022)	548.46	3	SIGMO	2	{3.841, 1.94}	0.47	0.97
hexadecane(1)+octacosane(2)	Yang and Wu (2022)	548.46	3	RK3	3	{3.853, -0.32, 1.343}	0	0
hexadecane(1)+octacosane(2)	Yang and Wu (2022)	548.46	3	JOAC3	3	{0.442, 0.113, 0.192}	0.01	0.01
hexadecane(1)+octacosane(2)	Yang and Wu (2022)	548.46	3	SFF	3	{-0.907, -0.503, 5.318}	0	0.01
hexadecane(1)+octacosane(2)	Lenahan et al. (2021)	573.15	3	EBE	1	{0.413}	0.85	1.83
hexadecane(1)+octacosane(2)	Lenahan et al. (2021)	573.15	3	WSD	1	{1.271}	0.99	1.8
hexadecane(1)+octacosane(2)	Lenahan et al. (2021)	573.15	3	JOAC1	1	{0.514}	1.35	3.55
hexadecane(1)+octacosane(2)	Lenahan et al. (2021)	573.15	3	BCRG	1	{0.175}	0.82	2.31
hexadecane(1)+octacosane(2)	Lenahan et al. (2021)	573.15	3	CW	2	{0.697, 0.5}	0.82	2.48
hexadecane(1)+octacosane(2)	Lenahan et al. (2021)	573.15	3	RK2	2	{4.369, -0.546}	0.83	2.49
hexadecane(1)+octacosane(2)	Lenahan et al. (2021)	573.15	3	JOAC2	2	{0.61, 0.193}	0.98	2.94
hexadecane(1)+octacosane(2)	Lenahan et al. (2021)	573.15	3	FLW	2	{0.852, 0.7}	1.36	4.06
hexadecane(1)+octacosane(2)	Lenahan et al. (2021)	573.15	3	QYDH	2	{0.455, 1.334}	0.8	1.95
hexadecane(1)+octacosane(2)	Lenahan et al. (2021)	573.15	3	SIGMO	2	{4.03, 1.854}	1.05	1.7
hexadecane(1)+octacosane(2)	Lenahan et al. (2021)	573.15	3	RK3	3	{3.399, -0.544, 3.88}	0	0
hexadecane(1)+octacosane(2)	Lenahan et al. (2021)	573.15	3	JOAC3	3	{0.494, 0.193, 0.465}	0	0
hexadecane(1)+octacosane(2)	Lenahan et al. (2021)	573.15	3	SFF	3	{-0.765, -8.042, 11.637}	0.41	1.24
hexadecane(1)+octacosane(2)	Yang and Wu (2022)	573.2	3	EBE	1	{0.333}	1.01	1.54
hexadecane(1)+octacosane(2)	Yang and Wu (2022)	573.2	3	WSD	1	{1.301}	1.21	3.43
hexadecane(1)+octacosane(2)	Yang and Wu (2022)	573.2	3	JOAC1	1	{0.651}	2.06	4.66
hexadecane(1)+octacosane(2)	Yang and Wu (2022)	573.2	3	BCRG	1	{0.122}	1.01	2.52
hexadecane(1)+octacosane(2)	Yang and Wu (2022)	573.2	3	CW	2	{0.534, 0.837}	0.89	2.68
hexadecane(1)+octacosane(2)	Yang and Wu (2022)	573.2	3	RK2	2	{5.202, -2.231}	1.06	3.17
hexadecane(1)+octacosane(2)	Yang and Wu (2022)	573.2	3	JOAC2	2	{0.618, 0.123}	1.34	4.01
hexadecane(1)+octacosane(2)	Yang and Wu (2022)	573.2	3	FLW	2	{1.579, 0.448}	1.13	3.39
hexadecane(1)+octacosane(2)	Yang and Wu (2022)	573.2	3	QYDH	2	{0.355, 1.362}	0.86	2.57
hexadecane(1)+octacosane(2)	Yang and Wu (2022)	573.2	3	SIGMO	2	{3.568, 2.075}	1.2	3.23
hexadecane(1)+octacosane(2)	Yang and Wu (2022)	573.2	3	RK3	3	{4.156, 0.194, 5.829}	0	0
hexadecane(1)+octacosane(2)	Yang and Wu (2022)	573.2	3	JOAC3	3	{0.561, 0.116, 0.792}	0.01	0.01
hexadecane(1)+octacosane(2)	Yang and Wu (2022)	573.2	3	SFF	3	{-1.022, -8.685, 16.429}	0.08	0.19
undecane(1)+hexadecane(2)	WW79P1 = Pugachevich et al. (1979)	303.15	5	EBE	1	{1.832}	0.36	1.06
undecane(1)+hexadecane(2)	WW79P1 = Pugachevich et al. (1979)	303.15	5	WSD	1	{0.975}	0.42	1.36
undecane(1)+hexadecane(2)	WW79P1 = Pugachevich et al. (1979)	303.15	5	JOAC1	1	{-0.047}	0.41	1.34
undecane(1)+hexadecane(2)	WW79P1 = Pugachevich et al. (1979)	303.15	5	BCRG	1	{3.308}	0.33	1.01
undecane(1)+hexadecane(2)	WW79P1 = Pugachevich et al. (1979)	303.15	5	CW	2	{-27.351, -6.795}	0.15	0.36
undecane(1)+hexadecane(2)	WW79P1 = Pugachevich et al. (1979)	303.15	5	RK2	2	{-1.574, -0.889}	0.32	1.04
undecane(1)+hexadecane(2)	WW79P1 = Pugachevich et al. (1979)	303.15	5	JOAC2	2	{-0.056, 0.032}	0.32	1.03
undecane(1)+hexadecane(2)	WW79P1 = Pugachevich et al. (1979)	303.15	5	FLW	2	{0.508, 1.925}	0.23	0.82
undecane(1)+hexadecane(2)	WW79P1 = Pugachevich et al. (1979)	303.15	5	QYDH	2	{1.186, 0.566}	0.2	0.44
undecane(1)+hexadecane(2)	WW79P1 = Pugachevich et al. (1979)	303.15	5	SIGMO	2	{8.043, 0.682}	0.21	0.62
undecane(1)+hexadecane(2)	WW79P1 = Pugachevich et al. (1979)	303.15	5	RK3	3	{-1.342, -1.11, -2.}	0.15	0.61
undecane(1)+hexadecane(2)	WW79P1 = Pugachevich et al. (1979)	303.15	5	JOAC3	3	{-0.047, 0.043, -0.083}	0.15	0.55
undecane(1)+hexadecane(2)	WW79P1 = Pugachevich et al. (1979)	303.15	5	SFF	3	{4.46, -4.148, 0.074}	0.26	0.86
undecane(1)+hexadecane(2)	WW79P1 = Pugachevich et al. (1979)	333.15	5	EBE	1	{1.102}	0.16	0.33
undecane(1)+hexadecane(2)	WW79P1 = Pugachevich et al. (1979)	333.15	5	WSD	1	{0.996}	0.16	0.33
undecane(1)+hexadecane(2)	WW79P1 = Pugachevich et al. (1979)	333.15	5	JOAC1	1	{-0.004}	0.16	0.34
undecane(1)+hexadecane(2)	WW79P1 = Pugachevich et al. (1979)	333.15	5	BCRG	1	{1.214}	0.16	0.33
undecane(1)+hexadecane(2)	WW79P1 = Pugachevich et al. (1979)	333.15	5	CW	2	{-28.11, -1.162}	0.07	0.27
undecane(1)+hexadecane(2)	WW79P1 = Pugachevich et al. (1979)	333.15	5	RK2	2	{-0.303, -0.395}	0.08	0.2
undecane(1)+hexadecane(2)	WW79P1 = Pugachevich et al. (1979)	333.15	5	JOAC2	2	{-0.004, 0.018}	0.08	0.21
undecane(1)+hexadecane(2)	WW79P1 = Pugachevich et al. (1979)	333.15	5	FLW	2	{0.781, 1.238}	0.23	0.5
undecane(1)+hexadecane(2)	WW79P1 = Pugachevich et al. (1979)	333.15	5	QYDH	2	{1.005, 0.884}	0.07	0.23
undecane(1)+hexadecane(2)	WW79P1 = Pugachevich et al. (1979)	333.15	5	SIGMO	2	{10.07, 0.932}	0.11	0.3
undecane(1)+hexadecane(2)	WW79P1 = Pugachevich et al. (1979)	333.15	5	RK3	3	{-0.303, -0.301, 0.235}	0.08	0.21
undecane(1)+hexadecane(2)	WW79P1 = Pugachevich et al. (1979)	333.15	5	JOAC3	3	{-0.004, 0.013, 0.011}	0.08	0.21
undecane(1)+hexadecane(2)	WW79P1 = Pugachevich et al. (1979)	333.15	5	SFF	3	{0.491, -0.506, 0.358}	0.07	0.21
undecane(1)+hexadecane(2)	WW79P1 = Pugachevich et al. (1979)	373.15	5	EBE	1	{0.923}	0.37	1.18
undecane(1)+hexadecane(2)	WW79P1 = Pugachevich et al. (1979)	373.15	5	WSD	1	{1.011}	0.37	1.19
undecane(1)+hexadecane(2)	WW79P1 = Pugachevich et al. (1979)	373.15	5	JOAC1	1	{0.03}	0.38	1.2
undecane(1)+hexadecane(2)	WW79P1 = Pugachevich et al. (1979)	373.15	5	BCRG	1	{0.852}	0.36	1.18
undecane(1)+hexadecane(2)	WW79P1 = Pugachevich et al. (1979)	373.15	5	CW	2	{0.99999999999999999999`25., 0.058}	0.14	0.34
undecane(1)+hexadecane(2)	WW79P1 = Pugachevich et al. (1979)	373.15	5	RK2	2	{0.42, -0.596}	0.22	0.87
undecane(1)+hexadecane(2)	WW79P1 = Pugachevich et al. (1979)	373.15	5	JOAC2	2	{0.038, 0.034}	0.22	0.89
undecane(1)+hexadecane(2)	WW79P1 = Pugachevich et al. (1979)	373.15	5	FLW	2	{1.07, 0.919}	0.49	1.44
undecane(1)+hexadecane(2)	WW79P1 = Pugachevich et al. (1979)	373.15	5	QYDH	2	{0.784, 0.843}	0.26	0.9
undecane(1)+hexadecane(2)	WW79P1 = Pugachevich et al. (1979)	373.15	5	SIGMO	2	{8.779, 1.059}	0.41	1.22
undecane(1)+hexadecane(2)	WW79P1 = Pugachevich et al. (1979)	373.15	5	RK3	3	{0.273, -0.596, 0.92}	0.17	0.65
undecane(1)+hexadecane(2)	WW79P1 = Pugachevich et al. (1979)	373.15	5	JOAC3	3	{0.03, 0.034, 0.05}	0.17	0.67
undecane(1)+hexadecane(2)	WW79P1 = Pugachevich et al. (1979)	373.15	5	SFF	3	{0.033, -0.34, 1.14}	0.21	0.87
dodecane(1)+hexadecane(2)	Yang and Wu (2022)	300.6	3	EBE	1	{1.694}	0.8	1.78
dodecane(1)+hexadecane(2)	Yang and Wu (2022)	300.6	3	WSD	1	{0.976}	0.81	1.58
dodecane(1)+hexadecane(2)	Yang and Wu (2022)	300.6	3	JOAC1	1	{-0.045}	0.8	1.63
dodecane(1)+hexadecane(2)	Yang and Wu (2022)	300.6	3	BCRG	1	{2.833}	0.8	1.82
dodecane(1)+hexadecane(2)	Yang and Wu (2022)	300.6	3	CW	2	{-2.452E12, -4.307E11}	0.78	2.11
dodecane(1)+hexadecane(2)	Yang and Wu (2022)	300.6	3	RK2	2	{-2.219, 2.488}	0.68	2.05
dodecane(1)+hexadecane(2)	Yang and Wu (2022)	300.6	3	JOAC2	2	{-0.084, -0.103}	0.69	2.07
dodecane(1)+hexadecane(2)	Yang and Wu (2022)	300.6	3	FLW	2	{2.219, 0.516}	0.48	1.41
dodecane(1)+hexadecane(2)	Yang and Wu (2022)	300.6	3	QYDH	2	{1.111, 0.643}	0.79	2.17
dodecane(1)+hexadecane(2)	Yang and Wu (2022)	300.6	3	SIGMO	2	{3.142, 0.72}	0.79	1.95
dodecane(1)+hexadecane(2)	Yang and Wu (2022)	300.6	3	RK3	2	{-0.171, 0.607, -8.871}	0	0
dodecane(1)+hexadecane(2)	Yang and Wu (2022)	300.6	3	JOAC3	2	{-0.002, -0.027, -0.354}	0.01	0.01
dodecane(1)+hexadecane(2)	Yang and Wu (2022)	300.6	3	SFF	2	{0.186, 35.956, 14.16}	0.23	0.7
dodecane(1)+hexadecane(2)	Yang and Wu (2022)	323.44	3	EBE	1	{1.719}	0.24	0.63
dodecane(1)+hexadecane(2)	Yang and Wu (2022)	323.44	3	WSD	1	{0.978}	0.3	0.87
dodecane(1)+hexadecane(2)	Yang and Wu (2022)	323.44	3	JOAC1	1	{-0.042}	0.28	0.84
dodecane(1)+hexadecane(2)	Yang and Wu (2022)	323.44	3	BCRG	1	{3.214}	0.21	0.51
dodecane(1)+hexadecane(2)	Yang and Wu (2022)	323.44	3	CW	2	{-1.418E8, -3.889E7}	0.07	0.18
dodecane(1)+hexadecane(2)	Yang and Wu (2022)	323.44	3	RK2	2	{-1.674, -1.029}	0.15	0.45
dodecane(1)+hexadecane(2)	Yang and Wu (2022)	323.44	3	JOAC2	2	{-0.066, 0.041}	0.15	0.45
dodecane(1)+hexadecane(2)	Yang and Wu (2022)	323.44	3	FLW	2	{0.537, 1.831}	0.22	0.47
dodecane(1)+hexadecane(2)	Yang and Wu (2022)	323.44	3	QYDH	2	{1.254, 0.512}	0.08	0.25
dodecane(1)+hexadecane(2)	Yang and Wu (2022)	323.44	3	SIGMO	2	{13.056, 0.609}	0.11	0.24
dodecane(1)+hexadecane(2)	Yang and Wu (2022)	323.44	3	RK3	2	{-1.262, -1.409, -1.792}	0	0
dodecane(1)+hexadecane(2)	Yang and Wu (2022)	323.44	3	JOAC3	2	{-0.048, 0.057, -0.075}	0.01	0.01
dodecane(1)+hexadecane(2)	Yang and Wu (2022)	323.44	3	SFF	2	{3.86, -3.515, 0.144}	0.12	0.35
dodecane(1)+hexadecane(2)	Yang and Wu (2022)	348.69	3	EBE	1	{1.556}	0.68	1.88
dodecane(1)+hexadecane(2)	Yang and Wu (2022)	348.69	3	WSD	1	{0.978}	0.74	2.01
dodecane(1)+hexadecane(2)	Yang and Wu (2022)	348.69	3	JOAC1	1	{-0.042}	0.73	1.97
dodecane(1)+hexadecane(2)	Yang and Wu (2022)	348.69	3	BCRG	1	{2.479}	0.66	1.83
dodecane(1)+hexadecane(2)	Yang and Wu (2022)	348.69	3	CW	2	{-7.009E6, -2.712E6}	0.35	0.71
dodecane(1)+hexadecane(2)	Yang and Wu (2022)	348.69	3	RK2	2	{-2.142, -2.348}	0.3	0.91
dodecane(1)+hexadecane(2)	Yang and Wu (2022)	348.69	3	JOAC2	2	{-0.093, 0.106}	0.3	0.89
dodecane(1)+hexadecane(2)	Yang and Wu (2022)	348.69	3	FLW	2	{0.568, 1.725}	0.68	1.63
dodecane(1)+hexadecane(2)	Yang and Wu (2022)	348.69	3	QYDH	2	{1.121, 0.151}	0.14	0.36
dodecane(1)+hexadecane(2)	Yang and Wu (2022)	348.69	3	SIGMO	2	{20.12, 0.468}	0.56	1.08
dodecane(1)+hexadecane(2)	Yang and Wu (2022)	348.69	3	RK3	2	{-1.387, -3.043, -3.273}	0	0
dodecane(1)+hexadecane(2)	Yang and Wu (2022)	348.69	3	JOAC3	2	{-0.058, 0.138, -0.15}	0	0
dodecane(1)+hexadecane(2)	Yang and Wu (2022)	348.69	3	SFF	2	{6.127, -6.072, 0.187}	0.22	0.66
dodecane(1)+hexadecane(2)	Yang and Wu (2022)	373.63	3	EBE	1	{1.381}	0.79	1.78
dodecane(1)+hexadecane(2)	Yang and Wu (2022)	373.63	3	WSD	1	{0.982}	0.84	1.85
dodecane(1)+hexadecane(2)	Yang and Wu (2022)	373.63	3	JOAC1	1	{-0.032}	0.82	1.84
dodecane(1)+hexadecane(2)	Yang and Wu (2022)	373.63	3	BCRG	1	{1.928}	0.78	1.75
dodecane(1)+hexadecane(2)	Yang and Wu (2022)	373.63	3	CW	2	{-1.063E10, -3.256E9}	0.5	0.8
dodecane(1)+hexadecane(2)	Yang and Wu (2022)	373.63	3	RK2	2	{-1.518, -2.506}	0.16	0.49
dodecane(1)+hexadecane(2)	Yang and Wu (2022)	373.63	3	JOAC2	2	{-0.069, 0.127}	0.16	0.46
dodecane(1)+hexadecane(2)	Yang and Wu (2022)	373.63	3	FLW	2	{0.636, 1.537}	0.8	1.49
dodecane(1)+hexadecane(2)	Yang and Wu (2022)	373.63	3	QYDH	2	{0.819, 0.076}	0.01	0.01
dodecane(1)+hexadecane(2)	Yang and Wu (2022)	373.63	3	SIGMO	2	{9.987, 0.775}	0.68	1.51
dodecane(1)+hexadecane(2)	Yang and Wu (2022)	373.63	3	RK3	2	{-1.153, -2.842, -1.587}	0	0
dodecane(1)+hexadecane(2)	Yang and Wu (2022)	373.63	3	JOAC3	2	{-0.052, 0.143, -0.076}	0.02	0.02
dodecane(1)+hexadecane(2)	Yang and Wu (2022)	373.63	3	SFF	2	{6.695, -7.03, 0.178}	0.07	0.14
dodecane(1)+hexadecane(2)	Yang and Wu (2022)	398.83	3	EBE	1	{1.205}	0.8	1.65
dodecane(1)+hexadecane(2)	Yang and Wu (2022)	398.83	3	WSD	1	{0.989}	0.82	1.66
dodecane(1)+hexadecane(2)	Yang and Wu (2022)	398.83	3	JOAC1	1	{-0.016}	0.81	1.67
dodecane(1)+hexadecane(2)	Yang and Wu (2022)	398.83	3	BCRG	1	{1.457}	0.79	1.64
dodecane(1)+hexadecane(2)	Yang and Wu (2022)	398.83	3	CW	2	{-2.085E11, -4.678E10}	0.59	1
dodecane(1)+hexadecane(2)	Yang and Wu (2022)	398.83	3	RK2	2	{-0.995, -2.234}	0.1	0.3
dodecane(1)+hexadecane(2)	Yang and Wu (2022)	398.83	3	JOAC2	2	{-0.045, 0.127}	0.09	0.26
dodecane(1)+hexadecane(2)	Yang and Wu (2022)	398.83	3	FLW	2	{0.723, 1.347}	0.82	1.33
dodecane(1)+hexadecane(2)	Yang and Wu (2022)	398.83	3	QYDH	2	{0.729, 0.171}	0.05	0.13
dodecane(1)+hexadecane(2)	Yang and Wu (2022)	398.83	3	SIGMO	2	{12.032, 0.865}	0.72	1.47
dodecane(1)+hexadecane(2)	Yang and Wu (2022)	398.83	3	RK3	2	{-0.793, -2.419, -0.874}	0	0
dodecane(1)+hexadecane(2)	Yang and Wu (2022)	398.83	3	JOAC3	2	{-0.035, 0.136, -0.043}	0	0
dodecane(1)+hexadecane(2)	Yang and Wu (2022)	398.83	3	SFF	2	{2.962, -3.344, 0.343}	0.02	0.08
dodecane(1)+hexadecane(2)	Yang and Wu (2022)	423.09	3	EBE	1	{0.991}	1.02	1.94
dodecane(1)+hexadecane(2)	Yang and Wu (2022)	423.09	3	WSD	1	{1.004}	1.02	1.93
dodecane(1)+hexadecane(2)	Yang and Wu (2022)	423.09	3	JOAC1	1	{0.015}	1.02	1.95
dodecane(1)+hexadecane(2)	Yang and Wu (2022)	423.09	3	BCRG	1	{0.982}	1.02	1.94
dodecane(1)+hexadecane(2)	Yang and Wu (2022)	423.09	3	CW	2	{0.99999999999999999999`25., 0.004}	1	1.93
dodecane(1)+hexadecane(2)	Yang and Wu (2022)	423.09	3	RK2	2	{-0.446, -2.531}	0.06	0.17
dodecane(1)+hexadecane(2)	Yang and Wu (2022)	423.09	3	JOAC2	2	{-0.014, 0.163}	0.07	0.15
dodecane(1)+hexadecane(2)	Yang and Wu (2022)	423.09	3	FLW	2	{0.872, 1.112}	1.06	1.61
dodecane(1)+hexadecane(2)	Yang and Wu (2022)	423.09	3	QYDH	2	{0.559, 0.075}	0.07	0.22
dodecane(1)+hexadecane(2)	Yang and Wu (2022)	423.09	3	SIGMO	2	{7.178, 1.007}	1.02	1.95
dodecane(1)+hexadecane(2)	Yang and Wu (2022)	423.09	3	RK3	2	{-0.341, -2.627, -0.455}	0	0
dodecane(1)+hexadecane(2)	Yang and Wu (2022)	423.09	3	JOAC3	2	{-0.008, 0.167, -0.019}	0	0.01
dodecane(1)+hexadecane(2)	Yang and Wu (2022)	423.09	3	SFF	2	{1.771, -2.509, 0.612}	0	0
dodecane(1)+hexadecane(2)	Yang and Wu (2022)	447.64	3	EBE	1	{1.104}	1.08	2.95
dodecane(1)+hexadecane(2)	Yang and Wu (2022)	447.64	3	WSD	1	{0.995}	1.09	2.96
dodecane(1)+hexadecane(2)	Yang and Wu (2022)	447.64	3	JOAC1	1	{-0.001}	1.09	2.95
dodecane(1)+hexadecane(2)	Yang and Wu (2022)	447.64	3	BCRG	1	{1.217}	1.08	2.94
dodecane(1)+hexadecane(2)	Yang and Wu (2022)	447.64	3	CW	2	{-0.672, -0.121}	1.08	2.9
dodecane(1)+hexadecane(2)	Yang and Wu (2022)	447.64	3	RK2	2	{0.711, -2.515}	0.9	2.7
dodecane(1)+hexadecane(2)	Yang and Wu (2022)	447.64	3	JOAC2	2	{0.072, 0.19}	0.93	2.79
dodecane(1)+hexadecane(2)	Yang and Wu (2022)	447.64	3	FLW	2	{0.359, 2.322}	1.22	3.65
dodecane(1)+hexadecane(2)	Yang and Wu (2022)	447.64	3	QYDH	2	{0.406, 0.154}	0.93	2.79
dodecane(1)+hexadecane(2)	Yang and Wu (2022)	447.64	3	SIGMO	2	{0.3, 1.165}	1.08	3.23
dodecane(1)+hexadecane(2)	Yang and Wu (2022)	447.64	3	RK3	2	{-0.717, -1.203, 6.187}	0	0
dodecane(1)+hexadecane(2)	Yang and Wu (2022)	447.64	3	JOAC3	2	{-0.037, 0.091, 0.467}	0.03	0.03
dodecane(1)+hexadecane(2)	Yang and Wu (2022)	447.64	3	SFF	2	{0.111, -1.869, 4.413}	0.61	0.98
dodecane(1)+hexadecane(2)	Yang and Wu (2022)	472.92	3	EBE	1	{0.62}	0.67	1.05
dodecane(1)+hexadecane(2)	Yang and Wu (2022)	472.92	3	WSD	1	{1.058}	0.82	1.27
dodecane(1)+hexadecane(2)	Yang and Wu (2022)	472.92	3	JOAC1	1	{0.128}	0.9	1.42
dodecane(1)+hexadecane(2)	Yang and Wu (2022)	472.92	3	BCRG	1	{0.382}	0.62	0.99
dodecane(1)+hexadecane(2)	Yang and Wu (2022)	472.92	3	CW	2	{0.878, 0.242}	0.21	0.62
dodecane(1)+hexadecane(2)	Yang and Wu (2022)	472.92	3	RK2	2	{1.119, -1.628}	0.07	0.2
dodecane(1)+hexadecane(2)	Yang and Wu (2022)	472.92	3	JOAC2	2	{0.119, 0.149}	0.1	0.28
dodecane(1)+hexadecane(2)	Yang and Wu (2022)	472.92	3	FLW	2	{1.386, 0.693}	0.82	1.75
dodecane(1)+hexadecane(2)	Yang and Wu (2022)	472.92	3	QYDH	2	{0.454, 0.499}	0.06	0.17
dodecane(1)+hexadecane(2)	Yang and Wu (2022)	472.92	3	SIGMO	2	{4.59, 1.416}	0.98	1.62
dodecane(1)+hexadecane(2)	Yang and Wu (2022)	472.92	3	RK3	2	{1.025, -1.542, 0.407}	0	0
dodecane(1)+hexadecane(2)	Yang and Wu (2022)	472.92	3	JOAC3	2	{0.108, 0.138, 0.05}	0	0.01
dodecane(1)+hexadecane(2)	Yang and Wu (2022)	472.92	3	SFF	2	{-0.007, -1.137, 1.545}	0	0
dodecane(1)+hexadecane(2)	Yang and Wu (2022)	497.76	3	EBE	1	{0.456}	0.27	0.54
dodecane(1)+hexadecane(2)	Yang and Wu (2022)	497.76	3	WSD	1	{1.108}	0.2	0.41
dodecane(1)+hexadecane(2)	Yang and Wu (2022)	497.76	3	JOAC1	1	{0.229}	0.37	0.67
dodecane(1)+hexadecane(2)	Yang and Wu (2022)	497.76	3	BCRG	1	{0.198}	0.43	0.86
dodecane(1)+hexadecane(2)	Yang and Wu (2022)	497.76	3	CW	2	{0.284, 0.645}	0.04	0.11
dodecane(1)+hexadecane(2)	Yang and Wu (2022)	497.76	3	RK2	2	{1.95, -0.334}	0.03	0.08
dodecane(1)+hexadecane(2)	Yang and Wu (2022)	497.76	3	JOAC2	2	{0.221, 0.06}	0.01	0.01
dodecane(1)+hexadecane(2)	Yang and Wu (2022)	497.76	3	FLW	2	{1.345, 0.64}	0.27	0.81
dodecane(1)+hexadecane(2)	Yang and Wu (2022)	497.76	3	QYDH	2	{0.52, 1.183}	0.06	0.16
dodecane(1)+hexadecane(2)	Yang and Wu (2022)	497.76	3	SIGMO	2	{4.059, 1.737}	0.32	0.65
dodecane(1)+hexadecane(2)	Yang and Wu (2022)	497.76	3	RK3	2	{1.983, -0.364, -0.145}	0	0
dodecane(1)+hexadecane(2)	Yang and Wu (2022)	497.76	3	JOAC3	2	{0.221, 0.06, -0.001}	0	0.01
dodecane(1)+hexadecane(2)	Yang and Wu (2022)	497.76	3	SFF	2	{-0.608, -0.275, 0.866}	0.02	0.08
dodecane(1)+hexadecane(2)	Yang and Wu (2022)	522.73	3	EBE	1	{0.37}	0.48	1.2
dodecane(1)+hexadecane(2)	Yang and Wu (2022)	522.73	3	WSD	1	{1.162}	0.56	1.35
dodecane(1)+hexadecane(2)	Yang and Wu (2022)	522.73	3	JOAC1	1	{0.327}	0.74	1.98
dodecane(1)+hexadecane(2)	Yang and Wu (2022)	522.73	3	BCRG	1	{0.132}	0.63	1.53
dodecane(1)+hexadecane(2)	Yang and Wu (2022)	522.73	3	CW	2	{0.389, 0.874}	0.4	1.2
dodecane(1)+hexadecane(2)	Yang and Wu (2022)	522.73	3	RK2	2	{2.821, -0.717}	0.44	1.32
dodecane(1)+hexadecane(2)	Yang and Wu (2022)	522.73	3	JOAC2	2	{0.369, 0.137}	0.51	1.52
dodecane(1)+hexadecane(2)	Yang and Wu (2022)	522.73	3	FLW	2	{1.288, 0.587}	0.78	2.31
dodecane(1)+hexadecane(2)	Yang and Wu (2022)	522.73	3	QYDH	2	{0.41, 1.457}	0.39	1.15
dodecane(1)+hexadecane(2)	Yang and Wu (2022)	522.73	3	SIGMO	2	{3.941, 1.986}	0.55	1.39
dodecane(1)+hexadecane(2)	Yang and Wu (2022)	522.73	3	RK3	2	{2.358, -0.292, 2.004}	0	0
dodecane(1)+hexadecane(2)	Yang and Wu (2022)	522.73	3	JOAC3	2	{0.31, 0.083, 0.257}	0	0
dodecane(1)+hexadecane(2)	Yang and Wu (2022)	522.73	3	SFF	2	{-0.953, -13.755, 16.814}	0.08	0.23
dodecane(1)+hexadecane(2)	Yang and Wu (2022)	548.12	3	EBE	1	{0.334}	0.84	2.19
dodecane(1)+hexadecane(2)	Yang and Wu (2022)	548.12	3	WSD	1	{1.234}	0.66	1.26
dodecane(1)+hexadecane(2)	Yang and Wu (2022)	548.12	3	JOAC1	1	{0.456}	0.9	2.5
dodecane(1)+hexadecane(2)	Yang and Wu (2022)	548.12	3	BCRG	1	{0.111}	1.26	2.69
dodecane(1)+hexadecane(2)	Yang and Wu (2022)	548.12	3	CW	2	{0.281, 1.061}	0.53	1.58
dodecane(1)+hexadecane(2)	Yang and Wu (2022)	548.12	3	RK2	2	{3.16, -0.536}	0.55	1.66
dodecane(1)+hexadecane(2)	Yang and Wu (2022)	548.12	3	JOAC2	2	{0.513, 0.169}	0.68	2.01
dodecane(1)+hexadecane(2)	Yang and Wu (2022)	548.12	3	FLW	2	{1.029, 0.619}	1.02	3.04
dodecane(1)+hexadecane(2)	Yang and Wu (2022)	548.12	3	QYDH	2	{0.391, 1.547}	0.6	1.05
dodecane(1)+hexadecane(2)	Yang and Wu (2022)	548.12	3	SIGMO	2	{5.434, 2.385}	0.59	1.54
dodecane(1)+hexadecane(2)	Yang and Wu (2022)	548.12	3	RK3	2	{2.677, -0.093, 2.091}	0	0
dodecane(1)+hexadecane(2)	Yang and Wu (2022)	548.12	3	JOAC3	2	{0.435, 0.098, 0.337}	0	0
dodecane(1)+hexadecane(2)	Yang and Wu (2022)	548.12	3	SFF	2	{-1.072, -4.822, 12.423}	0.21	0.6
dodecane(1)+hexadecane(2)	Yang and Wu (2022)	573.16	3	EBE	1	{0.273}	1.41	2.75
dodecane(1)+hexadecane(2)	Yang and Wu (2022)	573.16	3	WSD	1	{1.334}	0.79	2.36
dodecane(1)+hexadecane(2)	Yang and Wu (2022)	573.16	3	JOAC1	1	{0.687}	1.74	3.78
dodecane(1)+hexadecane(2)	Yang and Wu (2022)	573.16	3	BCRG	1	{0.094}	2	3.9
dodecane(1)+hexadecane(2)	Yang and Wu (2022)	573.16	3	CW	2	{0.355, 1.135}	0.51	1.52
dodecane(1)+hexadecane(2)	Yang and Wu (2022)	573.16	3	RK2	2	{3.513, -0.795}	0.56	1.69
dodecane(1)+hexadecane(2)	Yang and Wu (2022)	573.16	3	JOAC2	2	{0.741, 0.311}	0.82	2.44
dodecane(1)+hexadecane(2)	Yang and Wu (2022)	573.16	3	FLW	2	{0.978, 0.54}	1.15	3.43
dodecane(1)+hexadecane(2)	Yang and Wu (2022)	573.16	3	QYDH	2	{0.333, 1.455}	0.59	1.66
dodecane(1)+hexadecane(2)	Yang and Wu (2022)	573.16	3	SIGMO	2	{2.326, 2.708}	0.61	1.64
dodecane(1)+hexadecane(2)	Yang and Wu (2022)	573.16	3	RK3	2	{3.115, -0.43, 1.722}	0	0
dodecane(1)+hexadecane(2)	Yang and Wu (2022)	573.16	3	JOAC3	2	{0.647, 0.225, 0.407}	0.01	0.01
dodecane(1)+hexadecane(2)	Yang and Wu (2022)	573.16	3	SFF	2	{-1.274, -5.444, 12.759}	0.01	0.03

## Sheet: CASE 4A
MIXTURE	REFERENCES	T / K	N-data	model	Nº of coefficients	Coefficients Value	AAD (%)	PDm (%)
methane(1)+ethane(2)	WW2013BAI4 = Baidakov et al. (2013)	193.15	8	EBE	1	{1.611}	1.73	4.84
methane(1)+ethane(2)	WW2013BAI4 = Baidakov et al. (2013)	193.15	8	BCRG	1	{2.713}	2.22	4.05
methane(1)+ethane(2)	WW2013BAI4 = Baidakov et al. (2013)	193.15	8	CW	2	{-0.182, -0.52}	1.37	4.24
methane(1)+ethane(2)	WW2013BAI4 = Baidakov et al. (2013)	193.15	8	RK2	2	{-7.162, -0.59}	1.36	4.2
methane(1)+ethane(2)	WW2013BAI4 = Baidakov et al. (2013)	193.15	8	FLW	2	{7590.092, 1.611}	1.73	4.84
methane(1)+ethane(2)	WW2013BAI4 = Baidakov et al. (2013)	193.15	8	QYDH	2	{1.732, 1.085}	1.26	3.95
methane(1)+ethane(2)	WW2013BAI4 = Baidakov et al. (2013)	193.15	8	SIGMO	2	{0.023, 1.128}	1.26	3.75
methane(1)+ethane(2)	WW2013BAI4 = Baidakov et al. (2013)	193.15	8	RK3	3	{-8.083, -1.258, 4.923}	1.18	3.57
methane(1)+ethane(2)	WW2013BAI4 = Baidakov et al. (2013)	193.15	8	SFF	3	{1.717, -1.268, 0.026}	1.46	4.58
methane(1)+ethane(2)	WW2013BAI4 = Baidakov et al. (2013)	233.15	9	EBE	1	{3.433}	6.5	13.02
methane(1)+ethane(2)	WW2013BAI4 = Baidakov et al. (2013)	233.15	9	BCRG	1	{12.915}	8.77	15.94
methane(1)+ethane(2)	WW2013BAI4 = Baidakov et al. (2013)	233.15	9	CW	2	{0.27, -1.302}	0.93	2.48
methane(1)+ethane(2)	WW2013BAI4 = Baidakov et al. (2013)	233.15	9	RK2	2	{-13.154, 1.784}	0.92	2.52
methane(1)+ethane(2)	WW2013BAI4 = Baidakov et al. (2013)	233.15	9	FLW	2	{2.304E6, 3.433}	6.5	13.02
methane(1)+ethane(2)	WW2013BAI4 = Baidakov et al. (2013)	233.15	9	QYDH	2	{5.785, 1.405}	2.23	4.76
methane(1)+ethane(2)	WW2013BAI4 = Baidakov et al. (2013)	233.15	9	SIGMO	2	{-0.545, 1.484}	2.43	6.43
methane(1)+ethane(2)	WW2013BAI4 = Baidakov et al. (2013)	233.15	9	RK3	3	{-12.84, 0.094, 1.879}	0.91	2.6
methane(1)+ethane(2)	WW2013BAI4 = Baidakov et al. (2013)	233.15	9	SFF	3	{1.247, 0.382, 0.649}	0.93	2.58
methane(1)+ethane(2)	WW2013BAI4 = Baidakov et al. (2013)	253.15	6	EBE	1	{3.841}	7.56	13.67
methane(1)+ethane(2)	WW2013BAI4 = Baidakov et al. (2013)	253.15	6	BCRG	1	{14.471}	9.44	15.82
methane(1)+ethane(2)	WW2013BAI4 = Baidakov et al. (2013)	253.15	6	CW	2	{0.99999999999999999999`25., -1.467}	0.86	1.98
methane(1)+ethane(2)	WW2013BAI4 = Baidakov et al. (2013)	253.15	6	RK2	2	{-15.459, 8.109}	0.49	1.12
methane(1)+ethane(2)	WW2013BAI4 = Baidakov et al. (2013)	253.15	6	FLW	2	{6403.969, 3.84}	7.57	13.69
methane(1)+ethane(2)	WW2013BAI4 = Baidakov et al. (2013)	253.15	6	QYDH	2	{10.076, 1.549}	1.72	3.38
methane(1)+ethane(2)	WW2013BAI4 = Baidakov et al. (2013)	253.15	6	SIGMO	2	{-0.673, 1.654}	1.88	3.76
methane(1)+ethane(2)	WW2013BAI4 = Baidakov et al. (2013)	253.15	6	RK3	3	{-12.829, 0.124, 6.019}	0.48	2.02
methane(1)+ethane(2)	WW2013BAI4 = Baidakov et al. (2013)	253.15	6	SFF	3	{0.785, 2.306, 0.489}	0.45	1.9
methane(1)+ethane(2)	WW2013BAI4 = Baidakov et al. (2013)	263.15	4	EBE	1	{4.45}	4.53	9.79
methane(1)+ethane(2)	WW2013BAI4 = Baidakov et al. (2013)	263.15	4	BCRG	1	{17.886}	6.27	12.27
methane(1)+ethane(2)	WW2013BAI4 = Baidakov et al. (2013)	263.15	4	CW	2	{0.672, -2.102}	0.05	0.18
methane(1)+ethane(2)	WW2013BAI4 = Baidakov et al. (2013)	263.15	4	RK2	2	{-13.19, 3.869}	0.07	0.22
methane(1)+ethane(2)	WW2013BAI4 = Baidakov et al. (2013)	263.15	4	FLW	2	{3.184, 4.367}	4.52	9.79
methane(1)+ethane(2)	WW2013BAI4 = Baidakov et al. (2013)	263.15	4	QYDH	2	{12.223, 1.493}	1.29	3.06
methane(1)+ethane(2)	WW2013BAI4 = Baidakov et al. (2013)	263.15	4	SIGMO	2	{-0.747, 1.58}	1.39	3.39
methane(1)+ethane(2)	WW2013BAI4 = Baidakov et al. (2013)	263.15	4	RK3	3	{-15.22, 9.451, -3.746}	0.03	0.1
methane(1)+ethane(2)	WW2013BAI4 = Baidakov et al. (2013)	263.15	4	SFF	3	{4.558, -2.242, 0.}	1.1	2.8
methane(1)+ethane(2)	WW2013BAI4 = Baidakov et al. (2013)	273.15	3	EBE	1	{5.095}	2.79	6.24
methane(1)+ethane(2)	WW2013BAI4 = Baidakov et al. (2013)	273.15	3	BCRG	1	{19.933}	4.26	9.02
methane(1)+ethane(2)	WW2013BAI4 = Baidakov et al. (2013)	273.15	3	CW	2	{-0.217, -3.111}	0.07	0.21
methane(1)+ethane(2)	WW2013BAI4 = Baidakov et al. (2013)	273.15	3	RK2	2	{-8.92, -1.032}	0.07	0.21
methane(1)+ethane(2)	WW2013BAI4 = Baidakov et al. (2013)	273.15	3	FLW	2	{1.358, 4.832}	2.76	6.18
methane(1)+ethane(2)	WW2013BAI4 = Baidakov et al. (2013)	273.15	3	QYDH	2	{9.391, 1.226}	0.54	1.56
methane(1)+ethane(2)	WW2013BAI4 = Baidakov et al. (2013)	273.15	3	SIGMO	2	{-0.781, 1.255}	0.56	1.65
methane(1)+ethane(2)	WW2013BAI4 = Baidakov et al. (2013)	273.15	3	RK3	3	{-2.747, -16.643, 9.843}	0	0
methane(1)+ethane(2)	WW2013BAI4 = Baidakov et al. (2013)	273.15	3	SFF	3	{5.877, -2.855, 0.001}	0.12	0.3
methane(1)+ethane(2)	WW2013BAI4 = Baidakov et al. (2013)	283.15	4	EBE	1	{6.814}	1.69	3.66
methane(1)+ethane(2)	WW2013BAI4 = Baidakov et al. (2013)	283.15	4	BCRG	1	{32.907}	2.63	5.67
methane(1)+ethane(2)	WW2013BAI4 = Baidakov et al. (2013)	283.15	4	CW	2	{-0.182, -4.45}	0.93	2.12
methane(1)+ethane(2)	WW2013BAI4 = Baidakov et al. (2013)	283.15	4	RK2	2	{-7.945, -0.777}	0.93	2.12
methane(1)+ethane(2)	WW2013BAI4 = Baidakov et al. (2013)	283.15	4	FLW	2	{0.601, 5.838}	1.63	3.53
methane(1)+ethane(2)	WW2013BAI4 = Baidakov et al. (2013)	283.15	4	QYDH	2	{18.854, 1.354}	0.62	1.63
methane(1)+ethane(2)	WW2013BAI4 = Baidakov et al. (2013)	283.15	4	SIGMO	2	{-0.945, 1.377}	0.62	1.68
methane(1)+ethane(2)	WW2013BAI4 = Baidakov et al. (2013)	283.15	4	RK3	3	{317.302, -733.764, 412.718}	0.48	1.9
methane(1)+ethane(2)	WW2013BAI4 = Baidakov et al. (2013)	283.15	4	SFF	3	{-8.012, 15.001, 0.07}	0.87	1.98
methane(1)+propane(2)	WW43W1 = Weinaug and Katz (1943)	258.15	5	EBE	1	{8.349}	24.37	42.38
methane(1)+propane(2)	WW43W1 = Weinaug and Katz (1943)	258.15	5	BCRG	1	{527.022}	31.06	54.1
methane(1)+propane(2)	WW43W1 = Weinaug and Katz (1943)	258.15	5	CW	2	{0.055, -1.637}	1.8	4.36
methane(1)+propane(2)	WW43W1 = Weinaug and Katz (1943)	258.15	5	RK2	2	{-20.398, 0.567}	1.79	4.34
methane(1)+propane(2)	WW43W1 = Weinaug and Katz (1943)	258.15	5	FLW	2	{-1.641, 8.42}	24.16	42.13
methane(1)+propane(2)	WW43W1 = Weinaug and Katz (1943)	258.15	5	QYDH	2	{25.433, 2.423}	6.93	17.26
methane(1)+propane(2)	WW43W1 = Weinaug and Katz (1943)	258.15	5	SIGMO	2	{-0.622, 2.796}	7.71	19.41
methane(1)+propane(2)	WW43W1 = Weinaug and Katz (1943)	258.15	5	RK3	3	{-20.274, -2.867, 11.523}	0.39	1.93
methane(1)+propane(2)	WW43W1 = Weinaug and Katz (1943)	258.15	5	SFF	3	{1.198, 0.737, 0.526}	1.55	4.28
methane(1)+propane(2)	Seneviratne et al. (2017)	272.2	10	EBE	1	{6.14}	32.54	134.11
methane(1)+propane(2)	Seneviratne et al. (2017)	272.2	10	BCRG	1	{115.137}	41.65	148.35
methane(1)+propane(2)	Seneviratne et al. (2017)	272.2	10	CW	2	{0.387, -1.26}	3.13	10.78
methane(1)+propane(2)	Seneviratne et al. (2017)	272.2	10	RK2	2	{-16.121, 3.774}	3.02	11.33
methane(1)+propane(2)	Seneviratne et al. (2017)	272.2	10	FLW	2	{1.958E6, 6.14}	32.54	134.11
methane(1)+propane(2)	Seneviratne et al. (2017)	272.2	10	QYDH	2	{14.256, 2.055}	14.57	92.4
methane(1)+propane(2)	Seneviratne et al. (2017)	272.2	10	SIGMO	2	{-0.589, 2.6}	15.64	90.46
methane(1)+propane(2)	Seneviratne et al. (2017)	272.2	10	RK3	3	{-16.124, 3.759, 0.13}	3	11.39
methane(1)+propane(2)	Seneviratne et al. (2017)	272.2	10	SFF	3	{0.921, 0.947, 0.551}	3.04	11.78
methane(1)+propane(2)	WW43W1 = Weinaug and Katz (1943)	283.15	7	EBE	1	{10.713}	38.59	74.5
methane(1)+propane(2)	WW43W1 = Weinaug and Katz (1943)	283.15	7	BCRG	1	{1953.244}	49.34	79.43
methane(1)+propane(2)	WW43W1 = Weinaug and Katz (1943)	283.15	7	CW	2	{0.06, -1.931}	4.24	12.93
methane(1)+propane(2)	WW43W1 = Weinaug and Katz (1943)	283.15	7	RK2	2	{-16.965, 0.52}	4.21	13.04
methane(1)+propane(2)	WW43W1 = Weinaug and Katz (1943)	283.15	7	FLW	2	{1.170E7, 10.713}	38.59	74.5
methane(1)+propane(2)	WW43W1 = Weinaug and Katz (1943)	283.15	7	QYDH	2	{29.813, 2.173}	13.49	61.36
methane(1)+propane(2)	WW43W1 = Weinaug and Katz (1943)	283.15	7	SIGMO	2	{-0.715, 2.451}	14.38	62.79
methane(1)+propane(2)	WW43W1 = Weinaug and Katz (1943)	283.15	7	RK3	3	{-16.986, 0.784, -0.593}	4.19	12.88
methane(1)+propane(2)	WW43W1 = Weinaug and Katz (1943)	283.15	7	SFF	3	{2.471, -0.486, 0.}	4.69	13.85
methane(1)+propane(2)	Seneviratne et al. (2017)	285.5	9	EBE	1	{11.112}	39.4	85.35
methane(1)+propane(2)	Seneviratne et al. (2017)	285.5	9	BCRG	1	{279.335}	53	180.22
methane(1)+propane(2)	Seneviratne et al. (2017)	285.5	9	CW	2	{-0.003, -1.744}	1.79	5.43
methane(1)+propane(2)	Seneviratne et al. (2017)	285.5	9	RK2	2	{-14.58, -0.02}	1.73	5.39
methane(1)+propane(2)	Seneviratne et al. (2017)	285.5	9	FLW	2	{-11486.459, 11.112}	39.4	85.35
methane(1)+propane(2)	Seneviratne et al. (2017)	285.5	9	QYDH	2	{41.062, 2.751}	15.85	56.94
methane(1)+propane(2)	Seneviratne et al. (2017)	285.5	9	SIGMO	2	{-0.623, 3.196}	17.09	59.16
methane(1)+propane(2)	Seneviratne et al. (2017)	285.5	9	RK3	3	{-14.597, -0.302, 1.133}	1.52	5.63
methane(1)+propane(2)	Seneviratne et al. (2017)	285.5	9	SFF	3	{1.747, -0.007, 0.394}	1.76	5.41
methane(1)+propane(2)	WW43W1 = Weinaug and Katz (1943)	303.15	12	EBE	1	{9.4}	43.92	284.22
methane(1)+propane(2)	WW43W1 = Weinaug and Katz (1943)	303.15	12	BCRG	1	{521.548}	56.84	325.58
methane(1)+propane(2)	WW43W1 = Weinaug and Katz (1943)	303.15	12	CW	2	{-0.477, -2.543}	3.03	14.58
methane(1)+propane(2)	WW43W1 = Weinaug and Katz (1943)	303.15	12	RK2	2	{-13.094, -2.871}	2.8	13.75
methane(1)+propane(2)	WW43W1 = Weinaug and Katz (1943)	303.15	12	FLW	2	{1.052E6, 9.4}	43.92	284.22
methane(1)+propane(2)	WW43W1 = Weinaug and Katz (1943)	303.15	12	QYDH	2	{72.659, 2.712}	19.93	105.19
methane(1)+propane(2)	WW43W1 = Weinaug and Katz (1943)	303.15	12	SIGMO	2	{-0.716, 3.045}	21.21	111.37
methane(1)+propane(2)	WW43W1 = Weinaug and Katz (1943)	303.15	12	RK3	3	{-12.86, -5.803, 5.082}	1.93	8.47
methane(1)+propane(2)	WW43W1 = Weinaug and Katz (1943)	303.15	12	SFF	3	{3.337, -1.528, 0.259}	3.54	15.7
methane(1)+propane(2)	Seneviratne et al. (2017)	303.34	5	EBE	1	{14.846}	46.27	94.53
methane(1)+propane(2)	Seneviratne et al. (2017)	303.34	5	BCRG	1	{19289.388}	54.98	103.57
methane(1)+propane(2)	Seneviratne et al. (2017)	303.34	5	CW	2	{-0.342, -2.456}	2.13	6.82
methane(1)+propane(2)	Seneviratne et al. (2017)	303.34	5	RK2	2	{-13.586, -2.09}	2.06	6.53
methane(1)+propane(2)	Seneviratne et al. (2017)	303.34	5	FLW	2	{948216.684, 14.846}	46.27	94.53
methane(1)+propane(2)	Seneviratne et al. (2017)	303.34	5	QYDH	2	{154.236, 3.184}	20.25	32.34
methane(1)+propane(2)	Seneviratne et al. (2017)	303.34	5	SIGMO	2	{-0.715, 3.607}	21.34	34.93
methane(1)+propane(2)	Seneviratne et al. (2017)	303.34	5	RK3	3	{-13.613, -1.76, -0.926}	1.98	7.39
methane(1)+propane(2)	Seneviratne et al. (2017)	303.34	5	SFF	3	{3.547, -1.651, 0.19}	2.42	7.94
methane(1)+propane(2)	WW43W1 = Weinaug and Katz (1943)	318.15	11	EBE	1	{8.447}	17.72	56.64
methane(1)+propane(2)	WW43W1 = Weinaug and Katz (1943)	318.15	11	BCRG	1	{99.615}	24.21	85.16
methane(1)+propane(2)	WW43W1 = Weinaug and Katz (1943)	318.15	11	CW	2	{-0.433, -3.045}	0.96	2.77
methane(1)+propane(2)	WW43W1 = Weinaug and Katz (1943)	318.15	11	RK2	2	{-11.353, -2.468}	0.92	2.71
methane(1)+propane(2)	WW43W1 = Weinaug and Katz (1943)	318.15	11	FLW	2	{4.028, 8.351}	17.71	56.71
methane(1)+propane(2)	WW43W1 = Weinaug and Katz (1943)	318.15	11	QYDH	2	{45.263, 2.092}	5.2	17.72
methane(1)+propane(2)	WW43W1 = Weinaug and Katz (1943)	318.15	11	SIGMO	2	{-0.821, 2.277}	5.6	18.36
methane(1)+propane(2)	WW43W1 = Weinaug and Katz (1943)	318.15	11	RK3	3	{-9.725, -9.055, 6.342}	0.72	2.63
methane(1)+propane(2)	WW43W1 = Weinaug and Katz (1943)	318.15	11	SFF	3	{2.977, -0.76, 0.92}	1.03	4.57
methane(1)+propane(2)	WW43W1 = Weinaug and Katz (1943)	338.15	6	EBE	1	{16.671}	30.4	92.63
methane(1)+propane(2)	WW43W1 = Weinaug and Katz (1943)	338.15	6	BCRG	1	{3133.28}	45.7	111.24
methane(1)+propane(2)	WW43W1 = Weinaug and Katz (1943)	338.15	6	CW	2	{-1.968, -5.562}	1.31	3.43
methane(1)+propane(2)	WW43W1 = Weinaug and Katz (1943)	338.15	6	RK2	2	{-5.468, -8.112}	1.63	6.23
methane(1)+propane(2)	WW43W1 = Weinaug and Katz (1943)	338.15	6	FLW	2	{0.716, 15.428}	30	92.71
methane(1)+propane(2)	WW43W1 = Weinaug and Katz (1943)	338.15	6	QYDH	2	{302.386, 2.477}	13.28	27.84
methane(1)+propane(2)	WW43W1 = Weinaug and Katz (1943)	338.15	6	SIGMO	2	{-1.018, 2.64}	13.87	28.5
methane(1)+propane(2)	WW43W1 = Weinaug and Katz (1943)	338.15	6	RK3	3	{-11.048, 9.246, -12.935}	0.97	4.33
methane(1)+propane(2)	WW43W1 = Weinaug and Katz (1943)	338.15	6	SFF	3	{5.151, -2.996, 0.553}	4.51	10.93

## Sheet: CASE 4B
MIXTURE	REFERENCES	T / K	N-data	model	Nº of coefficients	Coefficients Value	AAD (%)	PDm (%)
methane(1)+ethane(2)	WW2013BAI4 = Baidakov et al. (2013)	193.15	9	EBE	1	{1.583}	1.97	4.57
methane(1)+ethane(2)	WW2013BAI4 = Baidakov et al. (2013)	193.15	9	BCRG	1	{2.61}	2.44	3.84
methane(1)+ethane(2)	WW2013BAI4 = Baidakov et al. (2013)	193.15	9	CW	2	{-0.069, -0.471}	1.53	4.3
methane(1)+ethane(2)	WW2013BAI4 = Baidakov et al. (2013)	193.15	9	RK2	2	{-6.736, -0.223}	1.52	4.33
methane(1)+ethane(2)	WW2013BAI4 = Baidakov et al. (2013)	193.15	9	FLW	2	{7.721, 1.573}	1.96	4.98
methane(1)+ethane(2)	WW2013BAI4 = Baidakov et al. (2013)	193.15	9	QYDH	2	{1.714, 1.102}	1.29	3.99
methane(1)+ethane(2)	WW2013BAI4 = Baidakov et al. (2013)	193.15	9	SIGMO	2	{0.005, 1.165}	1.28	3.91
methane(1)+ethane(2)	WW2013BAI4 = Baidakov et al. (2013)	193.15	9	RK3	3	{-7.686, -0.568, 6.003}	1.18	3.62
methane(1)+ethane(2)	WW2013BAI4 = Baidakov et al. (2013)	193.15	9	SFF	3	{1.792, -1.346, 0.007}	1.55	4.49
methane(1)+ethane(2)	WW2013BAI4 = Baidakov et al. (2013)	233.15	10	EBE	1	{3.385}	6.08	13.15
methane(1)+ethane(2)	WW2013BAI4 = Baidakov et al. (2013)	233.15	10	BCRG	1	{12.484}	8.06	16
methane(1)+ethane(2)	WW2013BAI4 = Baidakov et al. (2013)	233.15	10	CW	2	{0.373, -1.238}	0.88	2.4
methane(1)+ethane(2)	WW2013BAI4 = Baidakov et al. (2013)	233.15	10	RK2	2	{-13.137, 2.463}	0.88	2.46
methane(1)+ethane(2)	WW2013BAI4 = Baidakov et al. (2013)	233.15	10	FLW	2	{1.243E6, 3.385}	6.08	13.15
methane(1)+ethane(2)	WW2013BAI4 = Baidakov et al. (2013)	233.15	10	QYDH	2	{5.951, 1.433}	2.02	4.55
methane(1)+ethane(2)	WW2013BAI4 = Baidakov et al. (2013)	233.15	10	SIGMO	2	{-0.543, 1.505}	2.2	6.3
methane(1)+ethane(2)	WW2013BAI4 = Baidakov et al. (2013)	233.15	10	RK3	3	{-12.615, -0.309, 2.965}	0.86	2.61
methane(1)+ethane(2)	WW2013BAI4 = Baidakov et al. (2013)	233.15	10	SFF	3	{1.194, 0.553, 0.827}	0.88	2.5
methane(1)+ethane(2)	WW2013BAI4 = Baidakov et al. (2013)	253.15	7	EBE	1	{3.946}	6.4	13.47
methane(1)+ethane(2)	WW2013BAI4 = Baidakov et al. (2013)	253.15	7	BCRG	1	{15.386}	8.11	15.71
methane(1)+ethane(2)	WW2013BAI4 = Baidakov et al. (2013)	253.15	7	CW	2	{0.99999999999999999999`25., -1.499}	0.56	1.35
methane(1)+ethane(2)	WW2013BAI4 = Baidakov et al. (2013)	253.15	7	RK2	2	{-15., 6.715}	0.54	1.56
methane(1)+ethane(2)	WW2013BAI4 = Baidakov et al. (2013)	253.15	7	FLW	2	{149.199, 3.944}	6.4	13.48
methane(1)+ethane(2)	WW2013BAI4 = Baidakov et al. (2013)	253.15	7	QYDH	2	{9.783, 1.512}	1.8	3.61
methane(1)+ethane(2)	WW2013BAI4 = Baidakov et al. (2013)	253.15	7	SIGMO	2	{-0.677, 1.613}	1.93	3.8
methane(1)+ethane(2)	WW2013BAI4 = Baidakov et al. (2013)	253.15	7	RK3	3	{-14.864, 6.299, 0.315}	0.54	1.6
methane(1)+ethane(2)	WW2013BAI4 = Baidakov et al. (2013)	253.15	7	SFF	3	{-2.504, 4.987, 0.078}	0.74	2.15
methane(1)+ethane(2)	WW2013BAI4 = Baidakov et al. (2013)	263.15	5	EBE	1	{4.488}	3.63	9.71
methane(1)+ethane(2)	WW2013BAI4 = Baidakov et al. (2013)	263.15	5	BCRG	1	{18.219}	5.04	12.24
methane(1)+ethane(2)	WW2013BAI4 = Baidakov et al. (2013)	263.15	5	CW	2	{0.595, -2.146}	0.16	0.36
methane(1)+ethane(2)	WW2013BAI4 = Baidakov et al. (2013)	263.15	5	RK2	2	{-12.997, 3.424}	0.17	0.36
methane(1)+ethane(2)	WW2013BAI4 = Baidakov et al. (2013)	263.15	5	FLW	2	{3.113, 4.403}	3.62	9.72
methane(1)+ethane(2)	WW2013BAI4 = Baidakov et al. (2013)	263.15	5	QYDH	2	{12.125, 1.485}	1.13	3.23
methane(1)+ethane(2)	WW2013BAI4 = Baidakov et al. (2013)	263.15	5	SIGMO	2	{-0.749, 1.571}	1.25	3.52
methane(1)+ethane(2)	WW2013BAI4 = Baidakov et al. (2013)	263.15	5	RK3	3	{-13.808, 6.572, -2.7}	0.24	0.75
methane(1)+ethane(2)	WW2013BAI4 = Baidakov et al. (2013)	263.15	5	SFF	3	{1.617, 1.288, 0.287}	0.25	0.46
methane(1)+ethane(2)	WW2013BAI4 = Baidakov et al. (2013)	273.15	4	EBE	1	{5.162}	2.11	6.09
methane(1)+ethane(2)	WW2013BAI4 = Baidakov et al. (2013)	273.15	4	BCRG	1	{20.451}	3.24	8.95
methane(1)+ethane(2)	WW2013BAI4 = Baidakov et al. (2013)	273.15	4	CW	2	{-0.352, -3.184}	0.11	0.41
methane(1)+ethane(2)	WW2013BAI4 = Baidakov et al. (2013)	273.15	4	RK2	2	{-8.544, -1.673}	0.11	0.41
methane(1)+ethane(2)	WW2013BAI4 = Baidakov et al. (2013)	273.15	4	FLW	2	{1.326, 4.893}	2.08	6.03
methane(1)+ethane(2)	WW2013BAI4 = Baidakov et al. (2013)	273.15	4	QYDH	2	{9.162, 1.21}	0.52	1.64
methane(1)+ethane(2)	WW2013BAI4 = Baidakov et al. (2013)	273.15	4	SIGMO	2	{-0.78, 1.237}	0.54	1.73
methane(1)+ethane(2)	WW2013BAI4 = Baidakov et al. (2013)	273.15	4	RK3	3	{-8.109, -2.773, 0.693}	0.1	0.41
methane(1)+ethane(2)	WW2013BAI4 = Baidakov et al. (2013)	273.15	4	SFF	3	{5.059, -2.164, 0.036}	0.15	0.41
methane(1)+ethane(2)	WW2013BAI4 = Baidakov et al. (2013)	283.15	5	EBE	1	{7.444}	1.41	2.97
methane(1)+ethane(2)	WW2013BAI4 = Baidakov et al. (2013)	283.15	5	BCRG	1	{39.52}	2.34	4.3
methane(1)+ethane(2)	WW2013BAI4 = Baidakov et al. (2013)	283.15	5	CW	2	{-2.442, -5.47}	1.07	2.97
methane(1)+ethane(2)	WW2013BAI4 = Baidakov et al. (2013)	283.15	5	RK2	2	{-0.448, -10.437}	1.06	2.97
methane(1)+ethane(2)	WW2013BAI4 = Baidakov et al. (2013)	283.15	5	FLW	2	{0.532, 6.356}	1.35	2.97
methane(1)+ethane(2)	WW2013BAI4 = Baidakov et al. (2013)	283.15	5	QYDH	2	{11.898, 1.156}	0.94	2.97
methane(1)+ethane(2)	WW2013BAI4 = Baidakov et al. (2013)	283.15	5	SIGMO	2	{-0.91, 1.167}	0.95	2.97
methane(1)+ethane(2)	WW2013BAI4 = Baidakov et al. (2013)	283.15	5	RK3	3	{-0.776, -9.698, -0.417}	1.06	2.97
methane(1)+ethane(2)	WW2013BAI4 = Baidakov et al. (2013)	283.15	5	SFF	3	{6.212, -1.885, 0.082}	1.11	2.97
methane(1)+propane(2)	Jiao et al. (2022)	203.97	11	EBE	1	{2.397}	9.22	45.3
methane(1)+propane(2)	Jiao et al. (2022)	203.97	11	BCRG	1	{6.261}	10.9	52.37
methane(1)+propane(2)	Jiao et al. (2022)	203.97	11	CW	2	{0.018, -0.789}	5.06	18.72
methane(1)+propane(2)	Jiao et al. (2022)	203.97	11	RK2	2	{-15.654, 0.144}	5.07	18.75
methane(1)+propane(2)	Jiao et al. (2022)	203.97	11	FLW	2	{1.165, 2.377}	7.46	44.21
methane(1)+propane(2)	Jiao et al. (2022)	203.97	11	QYDH	2	{2.481, 1.035}	6.97	36.77
methane(1)+propane(2)	Jiao et al. (2022)	203.97	11	SIGMO	2	{-0.167, 1.029}	7.34	39.3
methane(1)+propane(2)	Jiao et al. (2022)	203.97	11	RK3	3	{-14.669, -2.713, -13.044}	2.74	6.85
methane(1)+propane(2)	Jiao et al. (2022)	203.97	11	SFF	3	{0.795, 0.023, 4.645}	3.68	12.83
methane(1)+propane(2)	Jiao et al. (2022)	208.53	11	EBE	1	{2.665}	6.38	25.25
methane(1)+propane(2)	Jiao et al. (2022)	208.53	11	BCRG	1	{8.322}	7.65	31.5
methane(1)+propane(2)	Jiao et al. (2022)	208.53	11	CW	2	{0.102, -0.807}	5.46	11.02
methane(1)+propane(2)	Jiao et al. (2022)	208.53	11	RK2	2	{-16.149, 0.886}	5.45	11.06
methane(1)+propane(2)	Jiao et al. (2022)	208.53	11	FLW	2	{-0.735, 2.588}	6.23	24.06
methane(1)+propane(2)	Jiao et al. (2022)	208.53	11	QYDH	2	{3.17, 1.321}	6.26	22.71
methane(1)+propane(2)	Jiao et al. (2022)	208.53	11	SIGMO	2	{-0.366, 1.46}	6.27	24.94
methane(1)+propane(2)	Jiao et al. (2022)	208.53	11	RK3	3	{-14.868, -1.149, -18.898}	2.52	7.97
methane(1)+propane(2)	Jiao et al. (2022)	208.53	11	SFF	3	{0.785, 3.867, 9.638}	5.41	10.99
methane(1)+propane(2)	WW43W1 = Weinaug and Katz (1943)	258.15	6	EBE	1	{8.32}	20.38	42.41
methane(1)+propane(2)	WW43W1 = Weinaug and Katz (1943)	258.15	6	BCRG	1	{516.874}	25.93	54.1
methane(1)+propane(2)	WW43W1 = Weinaug and Katz (1943)	258.15	6	CW	2	{0.064, -1.628}	1.61	4.42
methane(1)+propane(2)	WW43W1 = Weinaug and Katz (1943)	258.15	6	RK2	2	{-20.325, 0.67}	1.59	4.42
methane(1)+propane(2)	WW43W1 = Weinaug and Katz (1943)	258.15	6	FLW	2	{1.252E6, 8.32}	20.38	42.41
methane(1)+propane(2)	WW43W1 = Weinaug and Katz (1943)	258.15	6	QYDH	2	{25.416, 2.426}	5.77	17.03
methane(1)+propane(2)	WW43W1 = Weinaug and Katz (1943)	258.15	6	SIGMO	2	{-0.621, 2.8}	6.42	19.2
methane(1)+propane(2)	WW43W1 = Weinaug and Katz (1943)	258.15	6	RK3	3	{-20.456, 4.306, -12.198}	3.5	9.02
methane(1)+propane(2)	WW43W1 = Weinaug and Katz (1943)	258.15	6	SFF	3	{0.927, 0.979, 0.328}	1.28	3.98
methane(1)+propane(2)	Seneviratne et al. (2017)	272.2	11	EBE	1	{6.098}	29.73	134.19
methane(1)+propane(2)	Seneviratne et al. (2017)	272.2	11	BCRG	1	{111.858}	37.93	148.36
methane(1)+propane(2)	Seneviratne et al. (2017)	272.2	11	CW	2	{0.401, -1.247}	2.95	10.76
methane(1)+propane(2)	Seneviratne et al. (2017)	272.2	11	RK2	2	{-16., 3.909}	2.86	11.26
methane(1)+propane(2)	Seneviratne et al. (2017)	272.2	11	FLW	2	{4.375E6, 6.098}	29.73	134.19
methane(1)+propane(2)	Seneviratne et al. (2017)	272.2	11	QYDH	2	{14.192, 2.058}	13.16	92.39
methane(1)+propane(2)	Seneviratne et al. (2017)	272.2	11	SIGMO	2	{-0.588, 2.606}	14.12	89.8
methane(1)+propane(2)	Seneviratne et al. (2017)	272.2	11	RK3	3	{-16.018, 3.824, 0.775}	2.79	11.61
methane(1)+propane(2)	Seneviratne et al. (2017)	272.2	11	SFF	3	{0.777, 1.09, 0.468}	2.82	11.81
methane(1)+propane(2)	WW43W1 = Weinaug and Katz (1943)	283.15	8	EBE	1	{11.177}	33.88	74.42
methane(1)+propane(2)	WW43W1 = Weinaug and Katz (1943)	283.15	8	BCRG	1	{2617.348}	43.65	79.43
methane(1)+propane(2)	WW43W1 = Weinaug and Katz (1943)	283.15	8	CW	2	{-0.069, -2.055}	3.89	13.26
methane(1)+propane(2)	WW43W1 = Weinaug and Katz (1943)	283.15	8	RK2	2	{-17.581, -0.592}	3.86	13.42
methane(1)+propane(2)	WW43W1 = Weinaug and Katz (1943)	283.15	8	FLW	2	{-969.749, 11.178}	33.88	74.41
methane(1)+propane(2)	WW43W1 = Weinaug and Katz (1943)	283.15	8	QYDH	2	{29.977, 2.131}	12.97	61.73
methane(1)+propane(2)	WW43W1 = Weinaug and Katz (1943)	283.15	8	SIGMO	2	{-0.728, 2.403}	13.82	63.35
methane(1)+propane(2)	WW43W1 = Weinaug and Katz (1943)	283.15	8	RK3	3	{-17.706, 1.023, -3.623}	3.71	12.37
methane(1)+propane(2)	WW43W1 = Weinaug and Katz (1943)	283.15	8	SFF	3	{2.193, -0.247, 0.271}	3.88	13.39
methane(1)+propane(2)	Seneviratne et al. (2017)	285.5	10	EBE	1	{11.379}	35.35	85.29
methane(1)+propane(2)	Seneviratne et al. (2017)	285.5	10	BCRG	1	{279.335}	47.87	186.35
methane(1)+propane(2)	Seneviratne et al. (2017)	285.5	10	CW	2	{-0.089, -1.827}	1.58	5.06
methane(1)+propane(2)	Seneviratne et al. (2017)	285.5	10	RK2	2	{-14.961, -0.657}	1.58	5.02
methane(1)+propane(2)	Seneviratne et al. (2017)	285.5	10	FLW	2	{6.593E11, 11.379}	35.35	85.29
methane(1)+propane(2)	Seneviratne et al. (2017)	285.5	10	QYDH	2	{41.44, 2.731}	15.31	57.09
methane(1)+propane(2)	Seneviratne et al. (2017)	285.5	10	SIGMO	2	{-0.712, 2.376}	16.64	69.42
methane(1)+propane(2)	Seneviratne et al. (2017)	285.5	10	RK3	3	{-14.962, -0.667, 0.017}	1.58	5
methane(1)+propane(2)	Seneviratne et al. (2017)	285.5	10	SFF	3	{2.298, -0.594, 0.11}	1.69	5.26
methane(1)+propane(2)	WW43W1 = Weinaug and Katz (1943)	303.15	13	EBE	1	{9.431}	40.51	284.14
methane(1)+propane(2)	WW43W1 = Weinaug and Katz (1943)	303.15	13	BCRG	1	{530.715}	52.48	325.58
methane(1)+propane(2)	WW43W1 = Weinaug and Katz (1943)	303.15	13	CW	2	{-0.49, -2.556}	2.73	14.44
methane(1)+propane(2)	WW43W1 = Weinaug and Katz (1943)	303.15	13	RK2	2	{-13.125, -2.955}	2.52	13.57
methane(1)+propane(2)	WW43W1 = Weinaug and Katz (1943)	303.15	13	FLW	2	{824755.717, 9.431}	40.51	284.14
methane(1)+propane(2)	WW43W1 = Weinaug and Katz (1943)	303.15	13	QYDH	2	{72.686, 2.709}	18.51	105.22
methane(1)+propane(2)	WW43W1 = Weinaug and Katz (1943)	303.15	13	SIGMO	2	{-0.717, 3.042}	19.71	111.03
methane(1)+propane(2)	WW43W1 = Weinaug and Katz (1943)	303.15	13	RK3	3	{-13.268, -1.02, -4.619}	4.2	14.4
methane(1)+propane(2)	WW43W1 = Weinaug and Katz (1943)	303.15	13	SFF	3	{2.31, -1.465, 2.4}	2.02	12.52
methane(1)+propane(2)	Seneviratne et al. (2017)	303.34	6	EBE	1	{14.605}	38.86	94.58
methane(1)+propane(2)	Seneviratne et al. (2017)	303.34	6	BCRG	1	{16688.268}	46.06	103.57
methane(1)+propane(2)	Seneviratne et al. (2017)	303.34	6	CW	2	{-0.295, -2.411}	2.08	7.44
methane(1)+propane(2)	Seneviratne et al. (2017)	303.34	6	RK2	2	{-13.404, -1.808}	1.94	7.18
methane(1)+propane(2)	Seneviratne et al. (2017)	303.34	6	FLW	2	{302986.091, 14.605}	38.86	94.58
methane(1)+propane(2)	Seneviratne et al. (2017)	303.34	6	QYDH	2	{158.501, 3.218}	16.86	31.32
methane(1)+propane(2)	Seneviratne et al. (2017)	303.34	6	SIGMO	2	{-0.711, 3.646}	17.77	33.93
methane(1)+propane(2)	Seneviratne et al. (2017)	303.34	6	RK3	3	{-13.393, -1.921, 0.256}	1.9	6.99
methane(1)+propane(2)	Seneviratne et al. (2017)	303.34	6	SFF	3	{2.53, -0.655, 0.612}	2.13	7.73
methane(1)+propane(2)	WW43W1 = Weinaug and Katz (1943)	318.15	12	EBE	1	{8.713}	16.17	56.33
methane(1)+propane(2)	WW43W1 = Weinaug and Katz (1943)	318.15	12	BCRG	1	{99.615}	22.31	89.34
methane(1)+propane(2)	WW43W1 = Weinaug and Katz (1943)	318.15	12	CW	2	{-0.606, -3.201}	1.03	2.52
methane(1)+propane(2)	WW43W1 = Weinaug and Katz (1943)	318.15	12	RK2	2	{-11.294, -3.474}	1.02	2.44
methane(1)+propane(2)	WW43W1 = Weinaug and Katz (1943)	318.15	12	FLW	2	{3.748, 8.61}	16.14	56.41
methane(1)+propane(2)	WW43W1 = Weinaug and Katz (1943)	318.15	12	QYDH	2	{44.71, 2.062}	5.21	17.97
methane(1)+propane(2)	WW43W1 = Weinaug and Katz (1943)	318.15	12	SIGMO	2	{-0.829, 2.245}	5.57	18.76
methane(1)+propane(2)	WW43W1 = Weinaug and Katz (1943)	318.15	12	RK3	3	{-10.315, -7.409, 3.759}	1	2.7
methane(1)+propane(2)	WW43W1 = Weinaug and Katz (1943)	318.15	12	SFF	3	{6.564, -4.305, 0.092}	1.11	2.9
methane(1)+propane(2)	WW43W1 = Weinaug and Katz (1943)	338.15	7	EBE	1	{16.633}	26.11	92.64
methane(1)+propane(2)	WW43W1 = Weinaug and Katz (1943)	338.15	7	BCRG	1	{3086.928}	39.2	111.24
methane(1)+propane(2)	WW43W1 = Weinaug and Katz (1943)	338.15	7	CW	2	{-1.943, -5.538}	1.13	3.33
methane(1)+propane(2)	WW43W1 = Weinaug and Katz (1943)	338.15	7	RK2	2	{-5.504, -8.006}	1.38	6.08
methane(1)+propane(2)	WW43W1 = Weinaug and Katz (1943)	338.15	7	FLW	2	{0.717, 15.391}	25.77	92.72
methane(1)+propane(2)	WW43W1 = Weinaug and Katz (1943)	338.15	7	QYDH	2	{302.601, 2.479}	11.35	27.81
methane(1)+propane(2)	WW43W1 = Weinaug and Katz (1943)	338.15	7	SIGMO	2	{-1.018, 2.642}	11.9	28.71
methane(1)+propane(2)	WW43W1 = Weinaug and Katz (1943)	338.15	7	RK3	3	{-6.734, -4.183, -2.849}	1.24	4.74
methane(1)+propane(2)	WW43W1 = Weinaug and Katz (1943)	338.15	7	SFF	3	{4.385, -1.637, 0.721}	6.51	16.29
methane(1)+pentane(2)	Satherley et al. (2018)	313.15	7	EBE	1	{9.571}	34.66	71.05
methane(1)+pentane(2)	Satherley et al. (2018)	313.15	7	BCRG	1	{1019.251}	46.81	80.81
methane(1)+pentane(2)	Satherley et al. (2018)	313.15	7	CW	2	{-0.088, -1.854}	1.67	8.63
methane(1)+pentane(2)	Satherley et al. (2018)	313.15	7	RK2	2	{-24.524, -1.709}	1.64	7.27
methane(1)+pentane(2)	Satherley et al. (2018)	313.15	7	FLW	2	{360596.25, 9.571}	34.66	71.05
methane(1)+pentane(2)	Satherley et al. (2018)	313.15	7	QYDH	2	{24.271, 2.103}	14.35	46.7
methane(1)+pentane(2)	Satherley et al. (2018)	313.15	7	SIGMO	2	{-0.699, 2.374}	15.53	48.55
methane(1)+pentane(2)	Satherley et al. (2018)	313.15	7	RK3	3	{-24.526, -2.598, 3.003}	1.14	6.28
methane(1)+pentane(2)	Satherley et al. (2018)	313.15	7	SFF	3	{1.871, -0.127, 0.42}	1.75	9.54
methane(1)+nonane(2)	Kellizy (1970)	294.261	6	EBE	1	{1.839}	1.9	4.22
methane(1)+nonane(2)	Kellizy (1970)	294.261	6	BCRG	1	{3.277}	2.13	4.58
methane(1)+nonane(2)	Kellizy (1970)	294.261	6	CW	2	{0.99999999999999926793695970862372729625`25., -0.511}	0.79	2.04
methane(1)+nonane(2)	Kellizy (1970)	294.261	6	RK2	2	{-21.706, 12.699}	0.61	1.4
methane(1)+nonane(2)	Kellizy (1970)	294.261	6	FLW	2	{171749.186, 1.839}	1.9	4.22
methane(1)+nonane(2)	Kellizy (1970)	294.261	6	QYDH	2	{2.694, 1.275}	0.55	1.5
methane(1)+nonane(2)	Kellizy (1970)	294.261	6	SIGMO	2	{-0.285, 1.359}	0.61	1.67
methane(1)+nonane(2)	Kellizy (1970)	294.261	6	RK3	3	{-6.973, -45.819, 54.597}	0.35	1.27
methane(1)+nonane(2)	Kellizy (1970)	294.261	6	SFF	3	{0.365, 1.095, 0.911}	0.6	1.32
methane(1)+decane(2)	Kellizy (1970)	277.594	3	EBE	1	{0.324}	5.18	8.64
methane(1)+decane(2)	Kellizy (1970)	277.594	3	BCRG	1	{0.077}	4.7	8.1
methane(1)+decane(2)	Kellizy (1970)	277.594	3	CW	2	{0.99999999999999999999`25., 0.536}	3.32	6.56
methane(1)+decane(2)	Kellizy (1970)	277.594	3	RK2	2	{29.314, -35.241}	0.42	1.26
methane(1)+decane(2)	Kellizy (1970)	277.594	3	FLW	2	{3.466E-8, 0.317}	1.71	5.1
methane(1)+decane(2)	Kellizy (1970)	277.594	3	QYDH	2	{0.138, 0.}	0.57	0.95
methane(1)+decane(2)	Kellizy (1970)	277.594	3	SIGMO	2	{3.903, 1.951}	7.56	12.34
methane(1)+decane(2)	Kellizy (1970)	277.594	3	RK3	3	{28.741, -40.529, 10.209}	0	0
methane(1)+decane(2)	Kellizy (1970)	277.594	3	SFF	3	{-0.019, -3.017, 1.434}	0.02	0.02
methane(1)+decane(2)	Kellizy (1970)	310.928	4	EBE	1	{0.591}	2.35	4.13
methane(1)+decane(2)	Kellizy (1970)	310.928	4	BCRG	1	{0.324}	2.3	4.09
methane(1)+decane(2)	Kellizy (1970)	310.928	4	CW	2	{0.99999999999999999999`25., 0.347}	2.06	3.8
methane(1)+decane(2)	Kellizy (1970)	310.928	4	RK2	2	{25.49, -30.209}	0.41	0.99
methane(1)+decane(2)	Kellizy (1970)	310.928	4	FLW	2	{1.0E-20, 0.497}	0.41	0.91
methane(1)+decane(2)	Kellizy (1970)	310.928	4	QYDH	2	{0.256, 0.425}	0.08	0.16
methane(1)+decane(2)	Kellizy (1970)	310.928	4	SIGMO	2	{5.363, 1.293}	3.06	5.29
methane(1)+decane(2)	Kellizy (1970)	310.928	4	RK3	3	{8.62, 30.272, -51.718}	0.12	0.49
methane(1)+decane(2)	Kellizy (1970)	310.928	4	SFF	3	{1.913, -3.262, 0.223}	0.14	0.37
methane(1)+decane(2)	Kellizy (1970)	344.261	3	EBE	1	{0.66}	0.45	0.86
methane(1)+decane(2)	Kellizy (1970)	344.261	3	BCRG	1	{0.413}	0.44	0.84
methane(1)+decane(2)	Kellizy (1970)	344.261	3	CW	2	{0.99999999999999999999`25., 0.312}	0.36	0.69
methane(1)+decane(2)	Kellizy (1970)	344.261	3	RK2	2	{18.782, -15.782}	0.01	0.02
methane(1)+decane(2)	Kellizy (1970)	344.261	3	FLW	2	{0.102, 0.472}	0.02	0.07
methane(1)+decane(2)	Kellizy (1970)	344.261	3	QYDH	2	{0.39, 0.758}	0.03	0.09
methane(1)+decane(2)	Kellizy (1970)	344.261	3	SIGMO	2	{6.756, 1.176}	0.71	1.31
methane(1)+decane(2)	Kellizy (1970)	344.261	3	RK3	3	{15.691, -7.581, -5.382}	0	0
methane(1)+decane(2)	Kellizy (1970)	344.261	3	SFF	3	{-0.223, -3.741, 1.607}	0.04	0.1
